# Supplementary material for: Diaryliodonium as a double σ-hole donor: the dichotomy of thiocyanate halogen bonding provides divergent solid state arylation by diaryliodonium cations
Source: Royal Society of Chemistry journal article supplement (doi:10.1039/d0qo00678e), 2020-01-01
Supplement: d0qo00678e1.pdf [file d0qo00678e1.pdf]

## SUPPORTING INFORMATION

### Diaryliodonium as a Double $\sigma$ -Hole Donor: The Dichotomy of Thiocyanate Halogen Bonding Provides Divergent Solid State Arylation by Diaryliodonium Cations

Natalia S. Soldatova<sup>1</sup>, Pavel S. Postnikov<sup>2,3</sup>, Vitalii V. Suslonov<sup>1</sup>, Troyana Yu. Kissler<sup>1</sup>, Daniil M. Ivanov<sup>1</sup>, Mekhman S. Yusubov<sup>2\*</sup>, Bartomeu Galmés<sup>4</sup>, Antonio Frontera<sup>4\*</sup>, Vadim Yu. Kukushkin<sup>1,5\*</sup>

- 1 Institute of Chemistry, Saint Petersburg State University, Saint Petersburg 199034, Russian Federation
  - 2 Research School of Chemistry and Applied Biomedical Sciences, Tomsk Polytechnic University, Tomsk 634034, Russian Federation
  - 3 Department of Solid State Engineering, Institute of Chemical Technology, Prague 16628, Czech Republic
  - 4 Department of Chemistry, Universitat de les Illes Balear, Crta. de Valldemossa km 7.7, 07122 Palma de Mallorca (Balears), Spain
  - 5 South Ural State University, 76, Lenin Av., Chelyabinsk, 454080, Russian Federation.
- \* Correspondence: [yusubov@mail.ru](mailto:yusubov@mail.ru), [toni.frontera@uib.es](mailto:toni.frontera@uib.es), [v.kukushkin@spbu.ru](mailto:v.kukushkin@spbu.ru)

#### Table of Contents:

|                                                                                        |     |
|----------------------------------------------------------------------------------------|-----|
| <b>Table S1.</b> Crystal data and structure refinement for <b>3–7</b> .....            | S2  |
| <b>Table S2.</b> Crystal data and structure refinement for <b>8</b> and <b>9</b> ..... | S3  |
| Additional interactions observed in the crystal packing of <b>3</b> and <b>8</b> ..... | S4  |
| Synthesis of diaryliodonium trifluoroacetates .....                                    | S5  |
| Powder XRD data .....                                                                  | S8  |
| Thermolysis of diaryliodonium thiocyanates <b>4</b> , <b>8–9</b> .....                 | S11 |
| Mass-spectrum (EI) of thermolysis products of <b>4</b> , <b>8–9</b> .....              | S21 |
| Cartesian coordinates of the compounds used in the DFT study .....                     | S40 |
| References .....                                                                       | S49 |

**Table S1.** Crystal data and structure refinement for **3–7**.

| Identification code                         | <b>3</b>                                                            | <b>4</b>                                                            | <b>5</b>                                                            | <b>6</b>                                                            | <b>7</b>                                                            |
|---------------------------------------------|---------------------------------------------------------------------|---------------------------------------------------------------------|---------------------------------------------------------------------|---------------------------------------------------------------------|---------------------------------------------------------------------|
| CCDC number                                 | 2000276                                                             | 2000277                                                             | 2000278                                                             | 2000279                                                             | 2000280                                                             |
| Empirical formula                           | C <sub>13</sub> H <sub>10</sub> INS                                 | C <sub>16</sub> H <sub>16</sub> INO <sub>3</sub> S                  | C <sub>16</sub> H <sub>15</sub> FINO <sub>3</sub> S                 | C <sub>16</sub> H <sub>16</sub> INOS                                | C <sub>18</sub> H <sub>20</sub> INO <sub>3</sub> S                  |
| Formula weight                              | 339.18                                                              | 429.26                                                              | 447.25                                                              | 397.26                                                              | 457.31                                                              |
| Temperature/K                               | 100(2)                                                              | 100(2)                                                              | 100(2)                                                              | 100(2)                                                              | 100(2)                                                              |
| Crystal system                              | monoclinic                                                          | triclinic                                                           | monoclinic                                                          | triclinic                                                           | triclinic                                                           |
| Space group                                 | P2 <sub>1</sub> /n                                                  | P-1                                                                 | P2 <sub>1</sub> /c                                                  | P-1                                                                 | P-1                                                                 |
| a/Å                                         | 7.5458(5)                                                           | 7.9290(4)                                                           | 9.8222(4)                                                           | 7.9702(4)                                                           | 8.68740(10)                                                         |
| b/Å                                         | 11.1302(8)                                                          | 10.6799(5)                                                          | 23.0680(10)                                                         | 9.5118(4)                                                           | 9.16050(10)                                                         |
| c/Å                                         | 15.0196(10)                                                         | 10.9498(9)                                                          | 8.0455(4)                                                           | 11.5477(5)                                                          | 11.76420(10)                                                        |
| α/°                                         | 90                                                                  | 99.640(5)                                                           | 90                                                                  | 102.282(4)                                                          | 95.5680(10)                                                         |
| β/°                                         | 91.316(6)                                                           | 102.654(6)                                                          | 108.998(5)                                                          | 90.743(4)                                                           | 93.4270(10)                                                         |
| γ/°                                         | 90                                                                  | 107.017(4)                                                          | 90                                                                  | 107.413(4)                                                          | 99.6570(10)                                                         |
| Volume/Å <sup>3</sup>                       | 1261.11(15)                                                         | 838.04(9)                                                           | 1723.64(14)                                                         | 813.44(7)                                                           | 915.821(17)                                                         |
| Z                                           | 4                                                                   | 2                                                                   | 4                                                                   | 2                                                                   | 2                                                                   |
| ρ <sub>calc</sub> g/cm <sup>3</sup>         | 1.786                                                               | 1.701                                                               | 1.724                                                               | 1.622                                                               | 1.658                                                               |
| μ/mm <sup>-1</sup>                          | 2.676                                                               | 2.046                                                               | 2.001                                                               | 2.092                                                               | 14.934                                                              |
| F(000)                                      | 656.0                                                               | 424.0                                                               | 880.0                                                               | 392.0                                                               | 456.0                                                               |
| Crystal size/mm <sup>3</sup>                | 0.21 × 0.19 × 0.18                                                  | 0.25 × 0.21 × 0.18                                                  | 0.19 × 0.18 × 0.15                                                  | 0.20 × 0.18 × 0.16                                                  | 0.214 × 0.195 × 0.142                                               |
| Radiation                                   | MoKα<br>(λ = 0.71073)                                               | MoKα<br>(λ = 0.71073)                                               | MoKα<br>(λ = 0.71073)                                               | MoKα<br>(λ = 0.71073)                                               | CuKα<br>(λ = 1.54184)                                               |
| 2θ range for data collection/°              | 5.426 to 64.412                                                     | 5.604 to 64.364                                                     | 5.632 to 54.99                                                      | 5.374 to 55                                                         | 7.574 to 129.992                                                    |
| Index ranges                                | -10 ≤ h ≤ 10,<br>-16 ≤ k ≤ 10,<br>-12 ≤ l ≤ 22                      | -10 ≤ h ≤ 11,<br>-15 ≤ k ≤ 14,<br>-16 ≤ l ≤ 15                      | -12 ≤ h ≤ 12,<br>-27 ≤ k ≤ 29,<br>-10 ≤ l ≤ 8                       | -9 ≤ h ≤ 10,<br>-12 ≤ k ≤ 11,<br>-14 ≤ l ≤ 14                       | -10 ≤ h ≤ 9,<br>-10 ≤ k ≤ 10,<br>-13 ≤ l ≤ 13                       |
| Reflections collected                       | 7469                                                                | 9033                                                                | 9191                                                                | 6571                                                                | 11872                                                               |
| Independent reflections                     | 3991<br>[R <sub>int</sub> = 0.0313,<br>R <sub>sigma</sub> = 0.0495] | 5289<br>[R <sub>int</sub> = 0.0318,<br>R <sub>sigma</sub> = 0.0538] | 3968<br>[R <sub>int</sub> = 0.0242,<br>R <sub>sigma</sub> = 0.0319] | 3730<br>[R <sub>int</sub> = 0.0246,<br>R <sub>sigma</sub> = 0.0407] | 3114<br>[R <sub>int</sub> = 0.0556,<br>R <sub>sigma</sub> = 0.0416] |
| Data/restraints/parameters                  | 3991/0/145                                                          | 5289/0/202                                                          | 3968/0/211                                                          | 3730/0/184                                                          | 3114/0/204                                                          |
| Goodness-of-fit on F <sup>2</sup>           | 1.020                                                               | 1.039                                                               | 1.072                                                               | 1.034                                                               | 1.055                                                               |
| Final R indexes [I ≥ 2σ (I)]                | R <sub>1</sub> = 0.0287,<br>wR <sub>2</sub> = 0.0496                | R <sub>1</sub> = 0.0302,<br>wR <sub>2</sub> = 0.0622                | R <sub>1</sub> = 0.0227,<br>wR <sub>2</sub> = 0.0462                | R <sub>1</sub> = 0.0236,<br>wR <sub>2</sub> = 0.0488                | R <sub>1</sub> = 0.0348,<br>wR <sub>2</sub> = 0.0885                |
| Final R indexes [all data]                  | R <sub>1</sub> = 0.0399,<br>wR <sub>2</sub> = 0.0541                | R <sub>1</sub> = 0.0370,<br>wR <sub>2</sub> = 0.0661                | R <sub>1</sub> = 0.0265,<br>wR <sub>2</sub> = 0.0476                | R <sub>1</sub> = 0.0267,<br>wR <sub>2</sub> = 0.0500                | R <sub>1</sub> = 0.0352,<br>wR <sub>2</sub> = 0.0889                |
| Largest diff. peak/hole / e·Å <sup>-3</sup> | 0.80/-0.80                                                          | 0.75/-0.90                                                          | 0.47/-0.48                                                          | 0.49/-0.41                                                          | 1.16/-2.04                                                          |

**Table S2.** Crystal data and structure refinement for **8** and **9**.

| Identification code                         | <b>8</b>                                                            | <b>9</b>                                                            |
|---------------------------------------------|---------------------------------------------------------------------|---------------------------------------------------------------------|
| CCDC number                                 | 2000281                                                             | 2000282                                                             |
| Empirical formula                           | C <sub>16</sub> H <sub>15</sub> ClINO <sub>3</sub> S                | C <sub>16</sub> H <sub>15</sub> BrINO <sub>3</sub> S                |
| Formula weight                              | 463.70                                                              | 508.16                                                              |
| Temperature/K                               | 100(2)                                                              | 100(2)                                                              |
| Crystal system                              | triclinic                                                           | triclinic                                                           |
| Space group                                 | P-1                                                                 | P-1                                                                 |
| a/Å                                         | 8.4080(3)                                                           | 8.3448(5)                                                           |
| b/Å                                         | 10.5039(4)                                                          | 10.7012(8)                                                          |
| c/Å                                         | 11.2572(4)                                                          | 11.2708(9)                                                          |
| α/°                                         | 67.872(3)                                                           | 67.245(7)                                                           |
| β/°                                         | 70.296(3)                                                           | 70.464(6)                                                           |
| γ/°                                         | 82.896(3)                                                           | 83.175(5)                                                           |
| Volume/Å <sup>3</sup>                       | 867.04(6)                                                           | 874.64(12)                                                          |
| Z                                           | 2                                                                   | 2                                                                   |
| ρ <sub>calc</sub> g/cm <sup>3</sup>         | 1.776                                                               | 1.930                                                               |
| μ/mm <sup>-1</sup>                          | 2.134                                                               | 18.294                                                              |
| F(000)                                      | 456.0                                                               | 492.0                                                               |
| Crystal size/mm <sup>3</sup>                | 0.19 × 0.17 × 0.13                                                  | 0.16 × 0.15 × 0.1                                                   |
| Radiation                                   | MoKα<br>(λ = 0.71073)                                               | CuKα<br>(λ = 1.54184)                                               |
| 2θ range for data collection/°              | 5.482 to 54.996                                                     | 8.962 to 140.866                                                    |
| Index ranges                                | -10 ≤ h ≤ 10,<br>-13 ≤ k ≤ 13,<br>-14 ≤ l ≤ 14                      | -10 ≤ h ≤ 10,<br>-13 ≤ k ≤ 9,<br>-13 ≤ l ≤ 13                       |
| Reflections collected                       | 14517                                                               | 8682                                                                |
| Independent reflections                     | 3975<br>[R <sub>int</sub> = 0.0278,<br>R <sub>sigma</sub> = 0.0257] | 3323<br>[R <sub>int</sub> = 0.0524,<br>R <sub>sigma</sub> = 0.0565] |
| Data/restraints/parameters                  | 3975/0/211                                                          | 3323/0/211                                                          |
| Goodness-of-fit on F <sup>2</sup>           | 1.039                                                               | 1.027                                                               |
| Final R indexes [I ≥ 2σ (I)]                | R <sub>1</sub> = 0.0164,<br>wR <sub>2</sub> = 0.0374                | R <sub>1</sub> = 0.0375,<br>wR <sub>2</sub> = 0.0951                |
| Final R indexes [all data]                  | R <sub>1</sub> = 0.0180,<br>wR <sub>2</sub> = 0.0382                | R <sub>1</sub> = 0.0402,<br>wR <sub>2</sub> = 0.0968                |
| Largest diff. peak/hole / e·Å <sup>-3</sup> | 0.40/-0.31                                                          | 0.97/-1.18                                                          |

## Additional interactions observed in the crystal packing of **3** and **8**

In Figure S1 we show partial views the X-ray packing of compounds **3** (a) and **8** (b), where the thiocyanate anions have been omitted for clarity. Both compounds exhibit different packing architectures and interactions governing them. In compound **3**, the packing is dominated (among others) by  $\pi$ - $\pi$  stacking interactions (red dashed lines) and also C-H $\cdots$  $\pi$  involving the aromatic C-H atoms (see blue dashed lines). In compound **8**, the presence of the methoxy groups directs the formation of multiple CH<sub>3</sub> $\cdots$  $\pi$  interactions (represented as blue dashed lines) in addition to C-H $\cdots$  $\pi$  also involving aromatic C-H groups. Moreover, I $\cdots$  $\pi$  interactions are also established (blue dashed lines). This analysis of the crystal packing of **3** and **8** clearly supports that the negligible difference between the stabilities of the two different types of heterotetrameric motifs, can be easily overcome by packing effects since a multitude of noncovalent interactions are established. These interactions likely govern the formation of four or eight-membered supramolecular rings in the solid state.

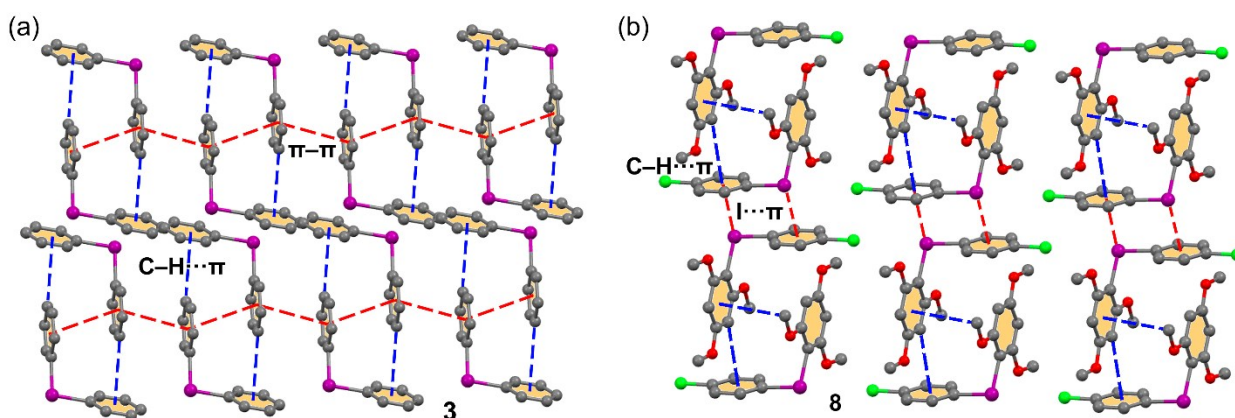

**Figure S1.** (a) Partial view of the X-ray of **3** with indication of the  $\pi$ - $\pi$  stacking (red dashed lines) and C-H $\cdots$  $\pi$  (blue dashed lines) interactions. (b) Partial view of the X-ray of **8** with indication of the CH<sub>3</sub>- $\pi$  and C-H $\cdots$  $\pi$  (blue dashed lines) interactions and I $\cdots$  $\pi$  interactions (red dashed lines).

## Synthesis of diaryliodonium trifluoroacetates

Diaryliodonium trifluoroacetates **S1–S7** were obtained by Method A<sup>1</sup> or Method B:

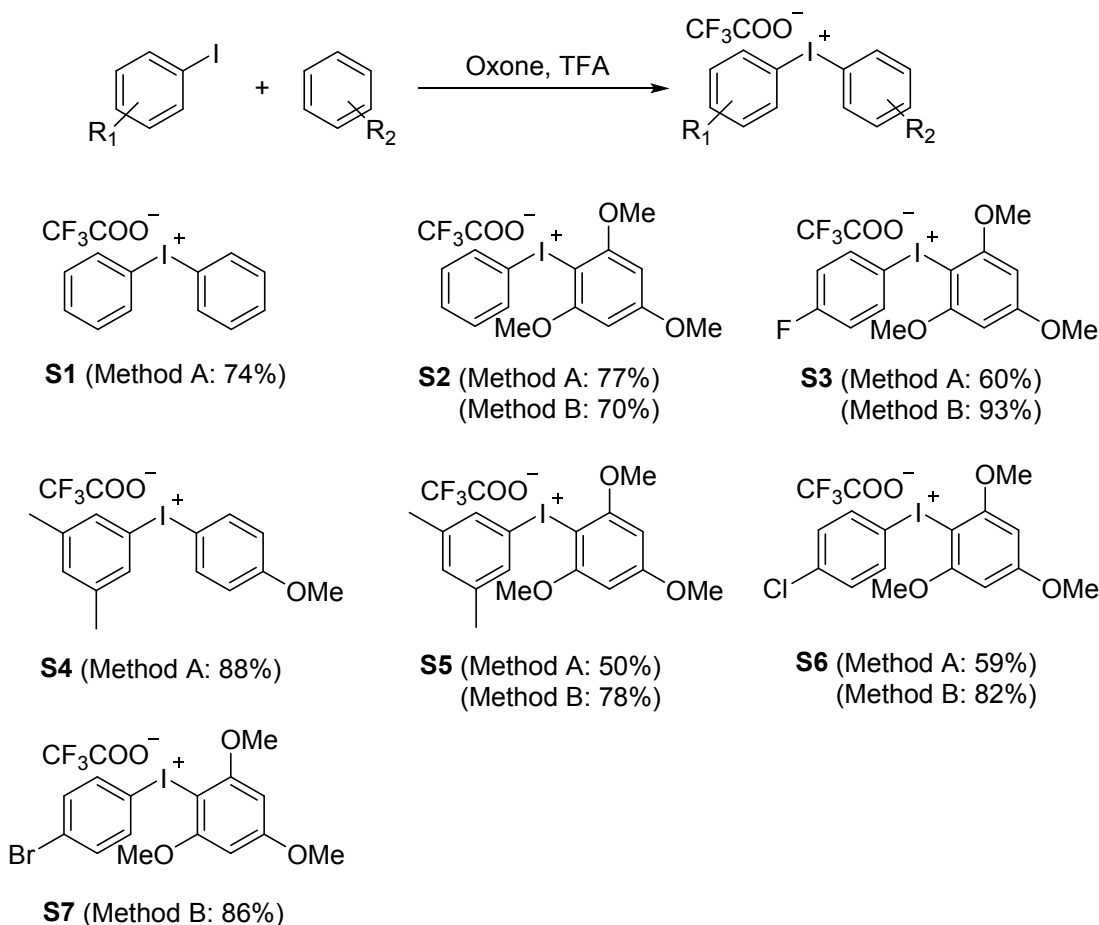

### Method A

Diaryliodonium trifluoroacetates **S1–S6** were prepared by the previously reported procedure in flow.<sup>1</sup>

Reagent mixture **1**: Iodoarene (0.898 mmol, 100  $\mu$ L) and TFA (1.39 mL) were dissolved  $\text{CH}_2\text{Cl}_2$  to achieve a total volume of 10 mL.

Reagent mixture **2**: Arene (1.037–1.087 mmol) or boronic acid (1.087 mmol) and TFA (1.53 mL) were dissolved  $\text{CH}_2\text{Cl}_2$  to achieve a total volume of 11 mL.

Reagent mixture **1** was pumped through the Oxone-filled cartridge using a syringe pump at a flow rate of 0.11 mL/min. After 15.5 minutes, reagent mixture **2** was started to pump with a second syringe pump with 0.11 mL/min. After the reagent mixture **1** addition, the syringe with a mixture of reagents was immediately replaced with a syringe with  $\text{CH}_2\text{Cl}_2$  (10 mL) and  $\text{CH}_2\text{Cl}_2$  was pumped with 0.11 mL/min until the end of the pumping reagent mixture **2**. Then flow rate was increased to 0.22 mL/min for 5 min, then and addition continued until the end of the  $\text{CH}_2\text{Cl}_2$  in the syringe with 0.5 mL/min flow rate. The solvent was removed from the resulting solution *in vacuo* at 40 °C and the residue was diluted with water (5 mL). The product was extracted with

CH<sub>2</sub>Cl<sub>2</sub> (3 × 5 mL). The organic layer was dried with Na<sub>2</sub>SO<sub>4</sub> and the solvent was removed *in vacuo*. Then diethyl ether (5 mL) was added to the residue and a precipitate was formed, the suspension was stirred for 10 min, then the product was filtered off and washed with diethyl ether (3×5 mL) and hexane (10 mL). The obtained product was dried *in vacuo* (10 mbar) at ambient temperature.

### Method B

This batch procedure for synthesis of **S2–S3**, **S5–S7** is based on previously reported flow synthesis of diaryliodonium trifluoroacetates.<sup>1</sup>

Oxone (1.234 g, 2 mmol) and iodoarene (2 mmol) were added to mixture of DCM and TFA (3 mL, 1:1 v/v). The reaction mixture was stirred for 20 min at ambient temperature. Reaction was monitored by TLC (Eluent: Hexane:EtOAc 10:1 v/v), whereupon the solvent was evaporated to dryness at 40 °C, and solid residue was suspended in DCM (25 mL) and stirred for 30 min. The suspension was filtered off and an inorganic residue was washed with 25 mL of DCM. The solvent was removed to 3–5 mL residue in a flask and trifluoroethanol (TFE) (1.5 mL) and 1,3,5-trimethoxybenzene (2.1 mmol, 353 mg) were added to the mixture and stirring was continued for 30 min at ambient temperature. The solvent was evaporated at 40 °C and cold Et<sub>2</sub>O (10 mL) was added to the residue. Product was filtered off and washed with cold Et<sub>2</sub>O (3×5 mL). The product was dried *in vacuo* (10 mbar) at ambient temperature.

**Diphenyliodonium trifluoroacetate (S1)**.<sup>1</sup> Obtained in 74% yield (Method A). <sup>1</sup>H NMR (400 MHz, DMSO-*d*<sub>6</sub>) δ: 8.24 (d, *J* = 7.6 Hz, 4H), 7.67 (t, *J* = 7.6 Hz, 2H), 7.53 (t, *J* = 7.6 Hz, 4H).

**Phenyl(2,4,6-trimethoxyphenyl)iodonium trifluoroacetate (S2)**.<sup>1,2</sup> Obtained in 77% yield (Method A) and 70% (Method B). <sup>1</sup>H NMR (400 MHz, DMSO-*d*<sub>6</sub>) δ: 7.91 (d, *J* = 7.2 Hz, 2H), 7.61 (t, *J* = 7.6 Hz, 1H), 7.47 (t, *J* = 7.6 Hz, 2H), 6.46 (s, 2H), 3.94 (s, 6H), 3.87 (s, 3H).

**(4-fluorophenyl)(2,4,6-trimethoxyphenyl)iodonium trifluoroacetate (S3)**.<sup>1,2</sup> Obtained in 60% yield (Method A) and 93% (Method B). <sup>1</sup>H NMR (400 MHz, DMSO-*d*<sub>6</sub>) δ: 8.00–7.93 (m, 2H), 7.33 (t, *J* = 8.8 Hz, 2H), 6.46 (s, 2H), 3.94 (s, 6H), 3.87 (s, 3H).

**(3,5-Dimethylphenyl)(4-methoxyphenyl)iodonium trifluoroacetate (S4)**.<sup>1</sup> Obtained in 88% yield (Method A). <sup>1</sup>H NMR (400 MHz, CDCl<sub>3</sub>) δ: 7.85 (d, *J* = 8.0 Hz, 2H), 7.51 (s, 2H), 7.12 (s, 1H), 6.89 (d, *J* = 8.4 Hz, 2H), 3.81 (s, 3H), 2.29 (s, 6H).

**(3,5-dimethylphenyl)(2,4,6-trimethoxyphenyl)iodonium trifluoroacetate (S5)**.<sup>1</sup> Obtained in 50% yield (Method A) and 78% (Method B). <sup>1</sup>H NMR (400 MHz, CDCl<sub>3</sub>) δ: 7.51 (s, 2H), 7.07 (s, 1H), 6.16 (s, 2H), 3.88 (s, 6H), 3.86 (s, 3H), 2.28 (s, 6H).

**(4-chlorophenyl)(2,4,6-trimethoxyphenyl)iodonium trifluoroacetate (S6).**<sup>1,2</sup> Obtained in 59% yield (Method A) and 82% (Method B). <sup>1</sup>H NMR (400 MHz, CDCl<sub>3</sub>) δ: 7.84 (d, *J* = 8.8 Hz, 2H), 7.30 (d, *J* = 8.8 Hz, 2H), 6.17 (s, 2H), 3.89 (s, 6H), 3.86 (s, 3H).

**(4-bromophenyl)(2,4,6-trimethoxyphenyl)iodonium trifluoroacetate (S7).**<sup>2</sup> Obtained in 86% (Method B). <sup>1</sup>H NMR (400 MHz, DMSO-*d*<sub>6</sub>) δ: 7.83 (d, *J* = 8.8 Hz, 2H), 7.67 (d, *J* = 8.4 Hz, 2H), 6.47 (s, 2H), 3.94 (s, 6H), 3.87 (s, 3H).

## Powder XRD data

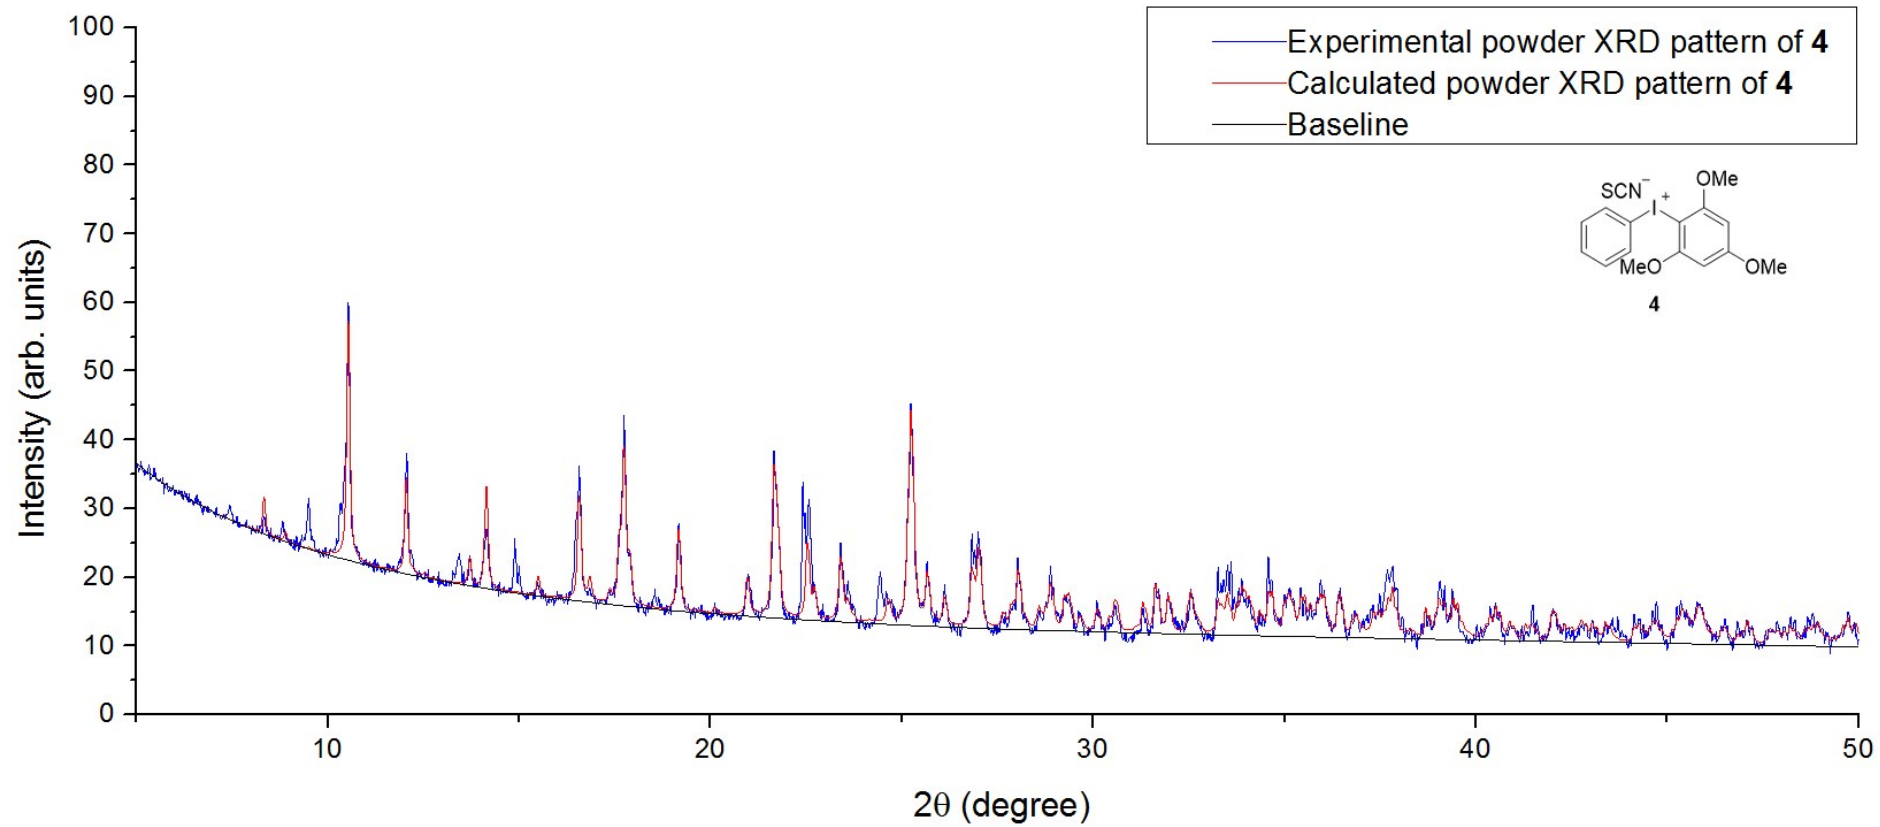



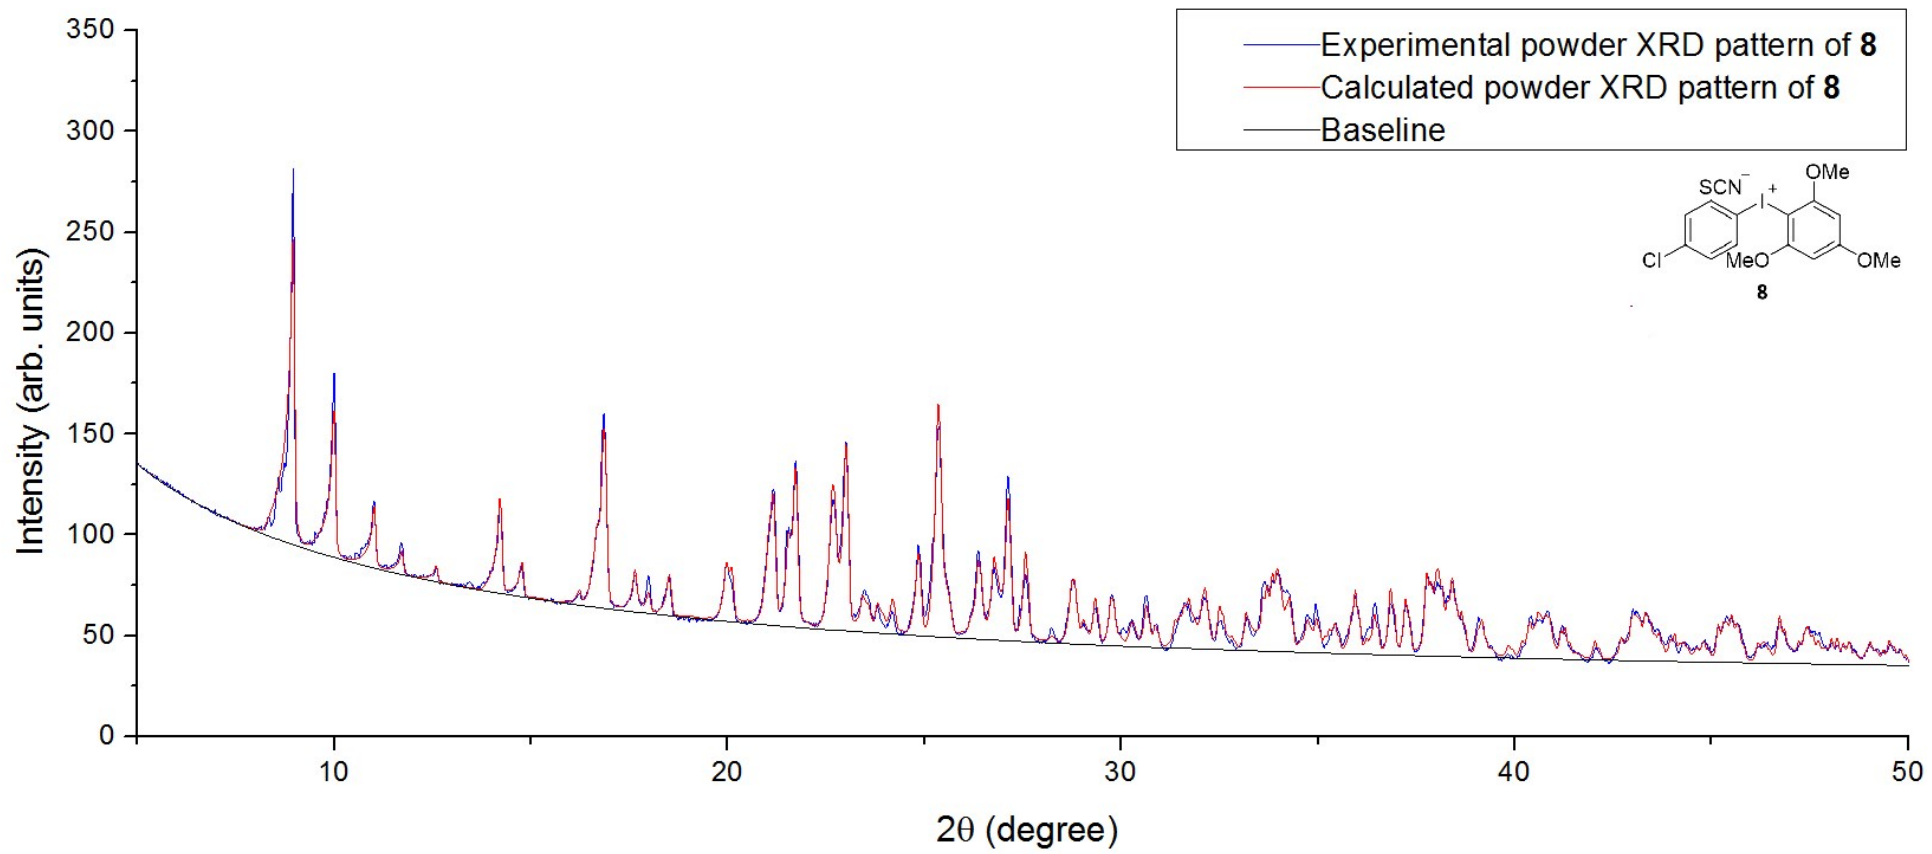

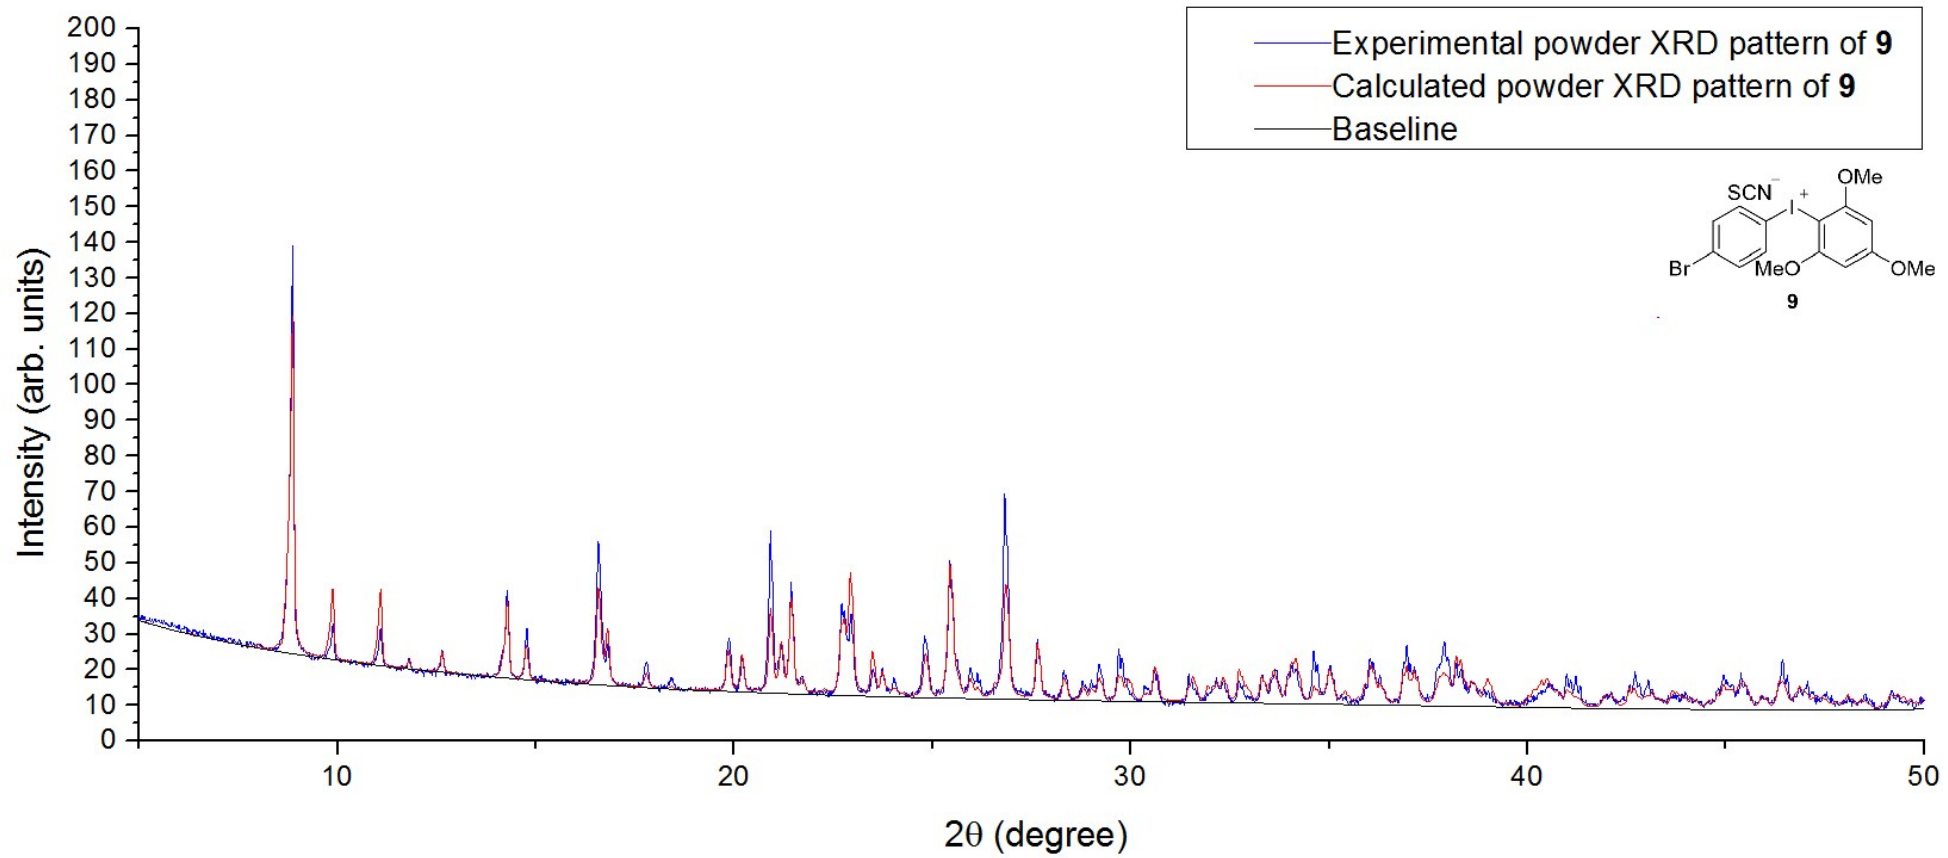

## Thermolysis of diaryliodonium thiocyanates **4**, **8–9**

**Table S3.** Detailed ratio of thermolysis products<sup>a</sup>

| 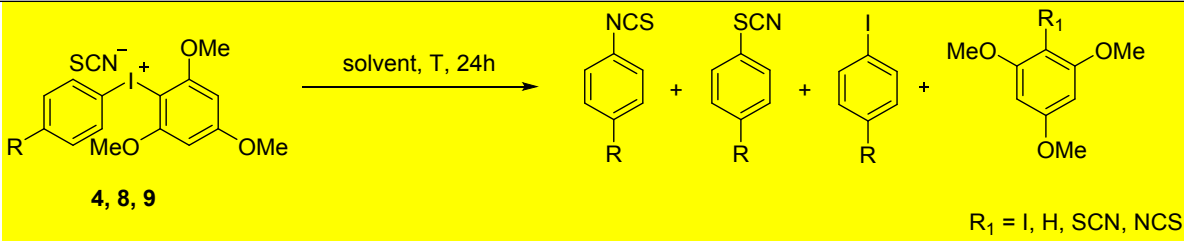 |           |                   |                  |                   |                  |                   |                  |                   |                  |                   |                  |                   |                  |                   |
|------------------------------------------------------------------------------------|-----------|-------------------|------------------|-------------------|------------------|-------------------|------------------|-------------------|------------------|-------------------|------------------|-------------------|------------------|-------------------|
| Entry                                                                              | Substrate | Products ratio, % |                  |                   |                  |                   |                  |                   |                  |                   |                  |                   |                  |                   |
|                                                                                    |           | ArNCS             |                  | ArSCN             |                  | ArI               |                  | TMPI              |                  | TMP               |                  | TMPSCN            |                  | TMPNCS            |
|                                                                                    |           | GCMS <sup>c</sup> | NMR <sup>b</sup> | GCMS <sup>c</sup> |
| 1                                                                                  | <b>4</b>  | 2                 | 2                | 29                | 38               | 4                 | 6                | 59                | 46               | 5                 | 6                | 2                 | 2                | –                 |
| 2                                                                                  | <b>4</b>  | –                 | 1                | 31                | 31               | 15                | 15               | 32                | 29               | 12                | 11               | 10                | 13               | –                 |
| 3                                                                                  | <b>8</b>  | 24                | 27               | 13                | 18               | 3                 | 5                | 52                | 43               | 2                 | 2                | 5                 | 5                | 1                 |
| 4                                                                                  | <b>8</b>  | –                 | –                | 15                | 19               | 20                | 21               | 31                | 26               | 8                 | 8                | 25                | 26               | <1                |
| 5                                                                                  | <b>9</b>  | 25                | 28               | 18                | 22               | 2                 | 1                | 53                | 47               | –                 | –                | <1                | <1               | <1                |
| 6                                                                                  | <b>9</b>  | –                 | –                | 23                | 27               | 21                | 20               | 30                | 24               | 6                 | 7                | 21                | 22               | –                 |

<sup>a</sup> Reactions were performed in a sealed NMR tube; <sup>b</sup> Calculated by NMR spectra; <sup>c</sup> According to the GCMS analysis;

Consistence of the solid phase composition of **4**, **8–9** to the single crystal XRD data was checked by powder XRD (see Powder XRD data). Powder of **8** (or **9**) obtained by the anion metathesis was used; powder of **4** was obtained by the recrystallization **4** in acetone (Table 3).

**Thermolysis of **4**, **8–9** in solid state (Entry 1, 3, 5).** Diaryliodonium thiocyanate (0.02 mmol) was heated in neat in an NMR tube at 100 °C for 24 h, whereupon the residue was diluted with DMSO-*d*<sub>6</sub> (0.6 mL) and monitored by <sup>1</sup>H NMR.

**Thermolysis of **4**, **8–9** in solution (Entry 2, 4, 6).** Diaryliodonium thiocyanate (0.02 mmol) was heated in a solution of DMSO-*d*<sub>6</sub> in an NMR tube at 100 °C for 24 h. Then reaction mixture was then monitored by <sup>1</sup>H NMR.

**Preparation of samples for GS-MS monitoring (Entry 1–6).** The reaction mixture in DMSO-*d*<sub>6</sub> was diluted with water (2 mL) and products were extracted with EtOAc (3×2 mL). The extract was dried over Na<sub>2</sub>SO<sub>4</sub> and flushed off through silica column (0.25 g). Additionally, silica column was washed with EtOAc (2 mL). Resulting solution in EtOAc was analyzed by GCMS.<sup>3</sup>

Final products ratio was calculated by using GCMS data and thus obtained values agree with the <sup>1</sup>H NMR data. According to <sup>1</sup>H NMR spectroscopy, the products in cases of Entries 2, 4, and 6 contain traces of the identified byproduct. However, side processes do not affect a ratio between ArSCN and ArNSC.

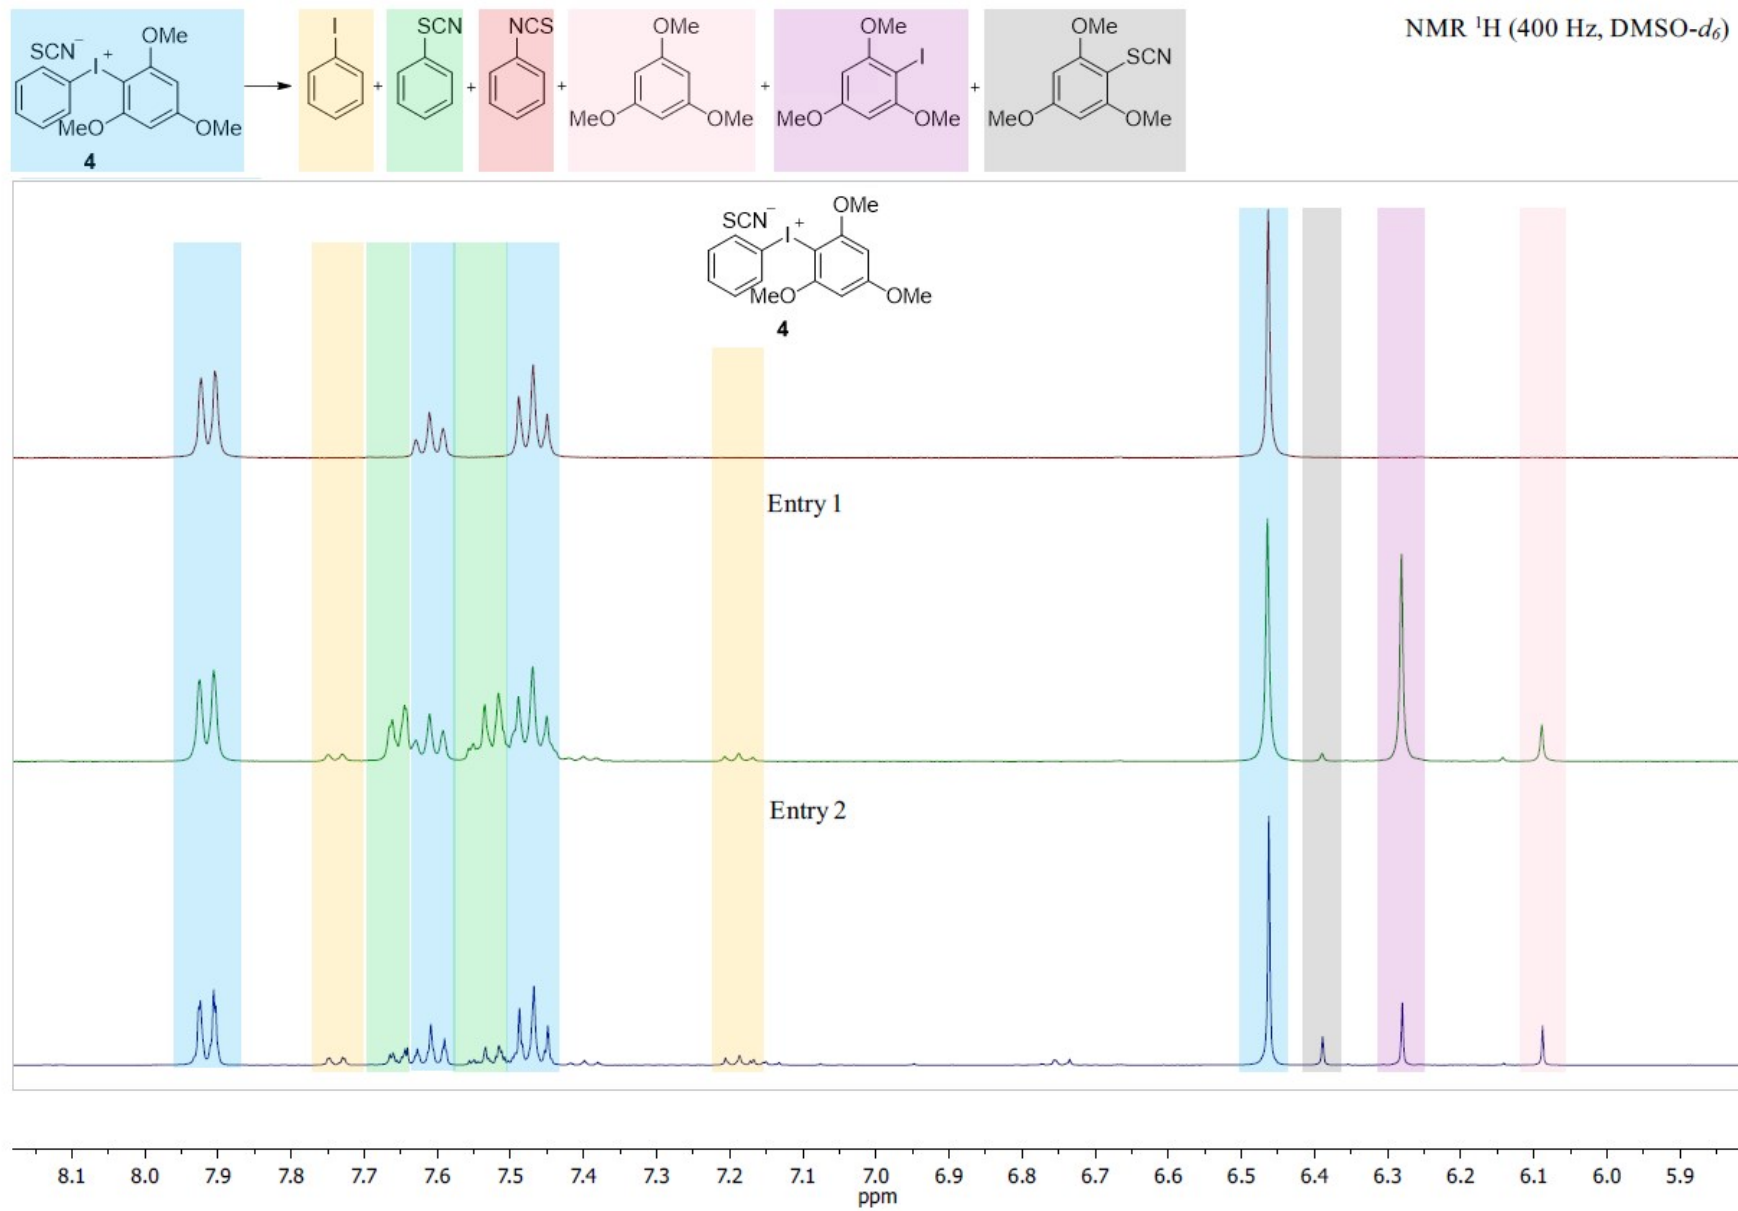

Entry 1

Chromatogram

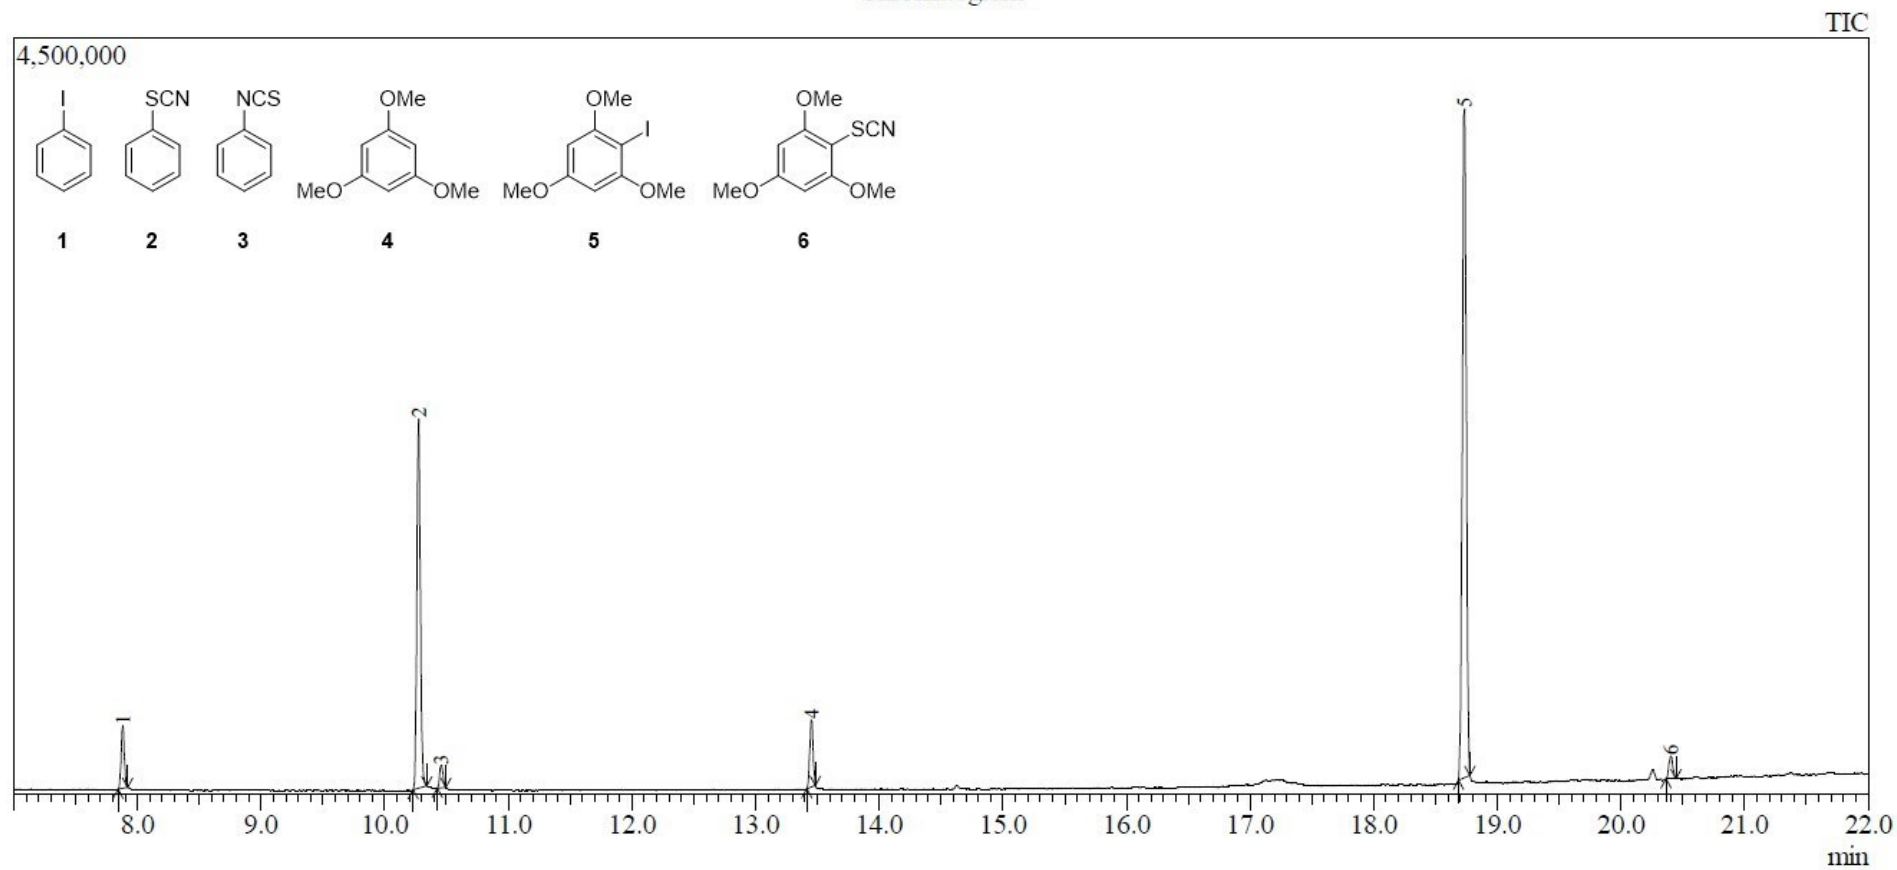

| Peak# | R. Time | Area     | Area%  | Height  | Height% | A/H  |
|-------|---------|----------|--------|---------|---------|------|
| 1     | 7.880   | 665588   | 4.34   | 372484  | 5.15    | 1.79 |
| 2     | 10.274  | 4384009  | 28.59  | 2200171 | 30.45   | 1.99 |
| 3     | 10.457  | 261601   | 1.71   | 135334  | 1.87    | 1.93 |
| 4     | 13.452  | 753110   | 4.91   | 400139  | 5.54    | 1.88 |
| 5     | 18.733  | 8974286  | 58.52  | 3983591 | 55.13   | 2.25 |
| 6     | 20.404  | 296291   | 1.93   | 134365  | 1.86    | 2.21 |
|       |         | 15334885 | 100.00 | 7226084 | 100.00  |      |

Entry 2

Chromatogram

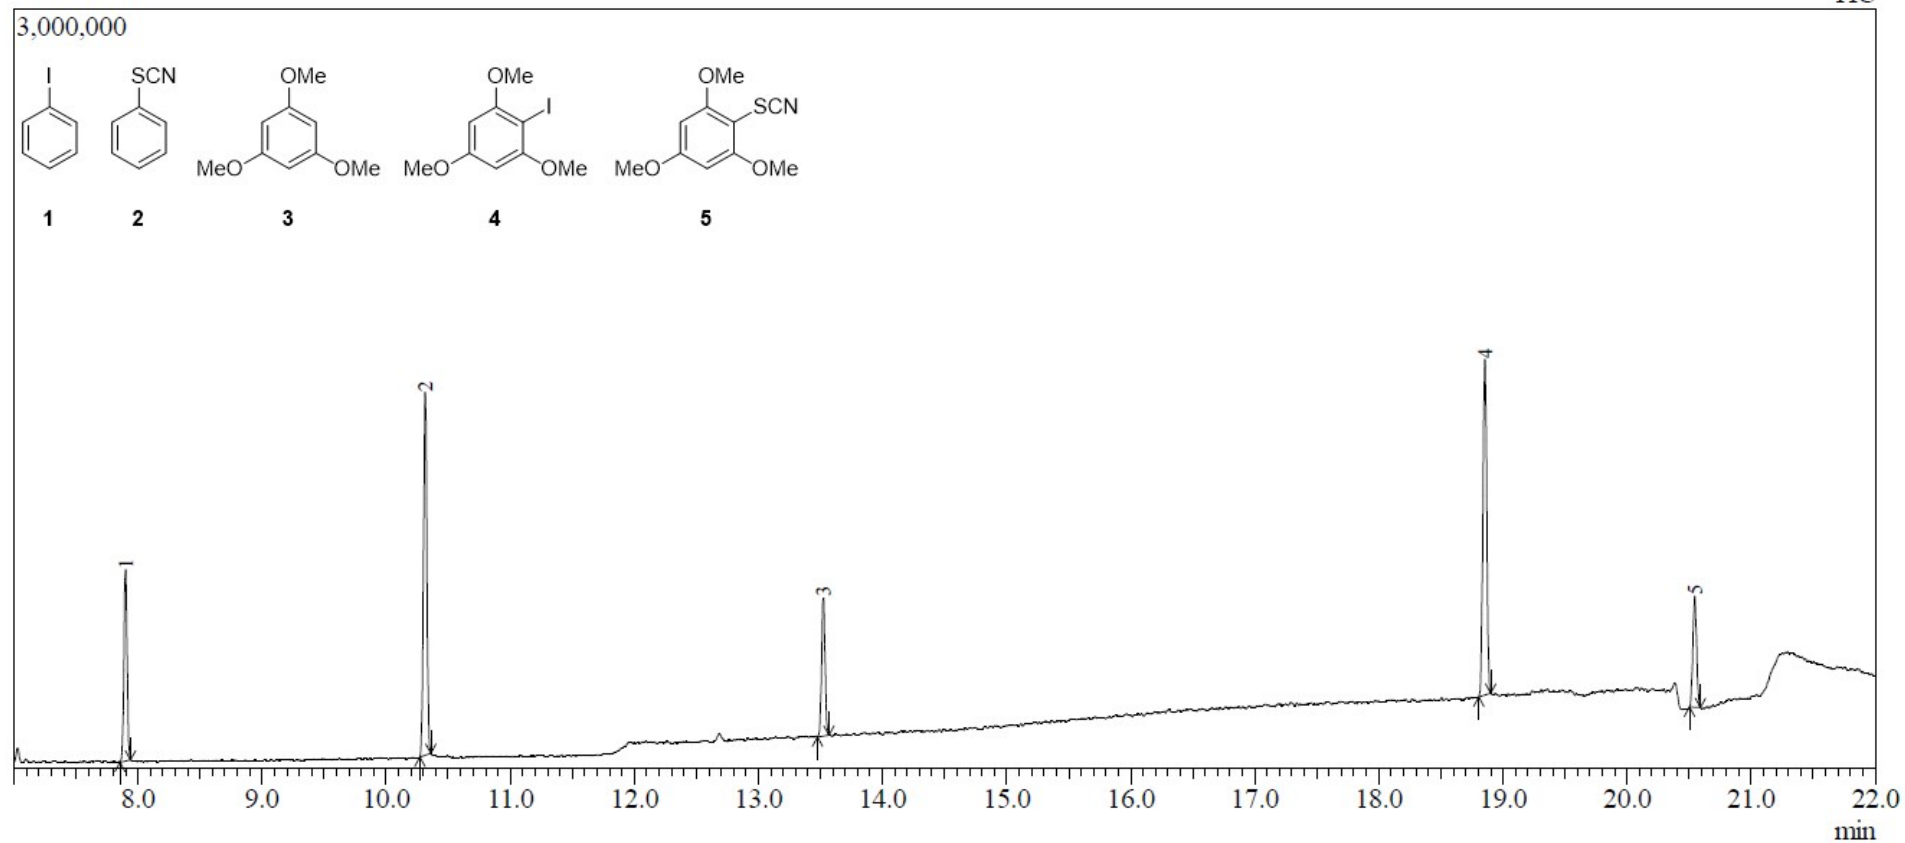

| Peak# | R.Time | Area    | Area%  | Peak Report TIC |         | A/H  |
|-------|--------|---------|--------|-----------------|---------|------|
|       |        |         |        | Height          | Height% |      |
| 1     | 7.899  | 1360525 | 15.24  | 756041          | 16.79   | 1.80 |
| 2     | 10.315 | 2732089 | 30.60  | 1432825         | 31.82   | 1.91 |
| 3     | 13.523 | 1076220 | 12.05  | 545715          | 12.12   | 1.97 |
| 4     | 18.854 | 2833943 | 31.74  | 1326642         | 29.47   | 2.14 |
| 5     | 20.545 | 926678  | 10.38  | 441045          | 9.80    | 2.10 |
|       |        | 8929455 | 100.00 | 4502268         | 100.00  |      |

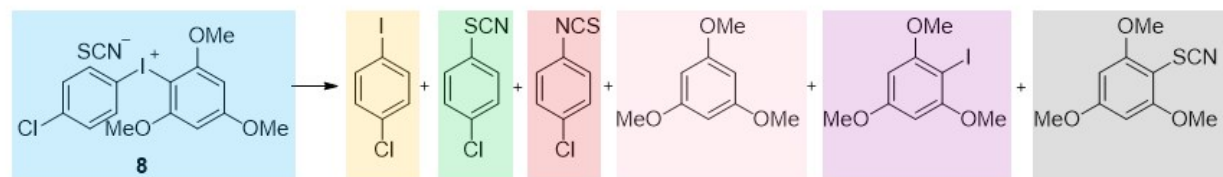

NMR  $^1\text{H}$  (400 Hz,  $\text{DMSO-}d_6$ )

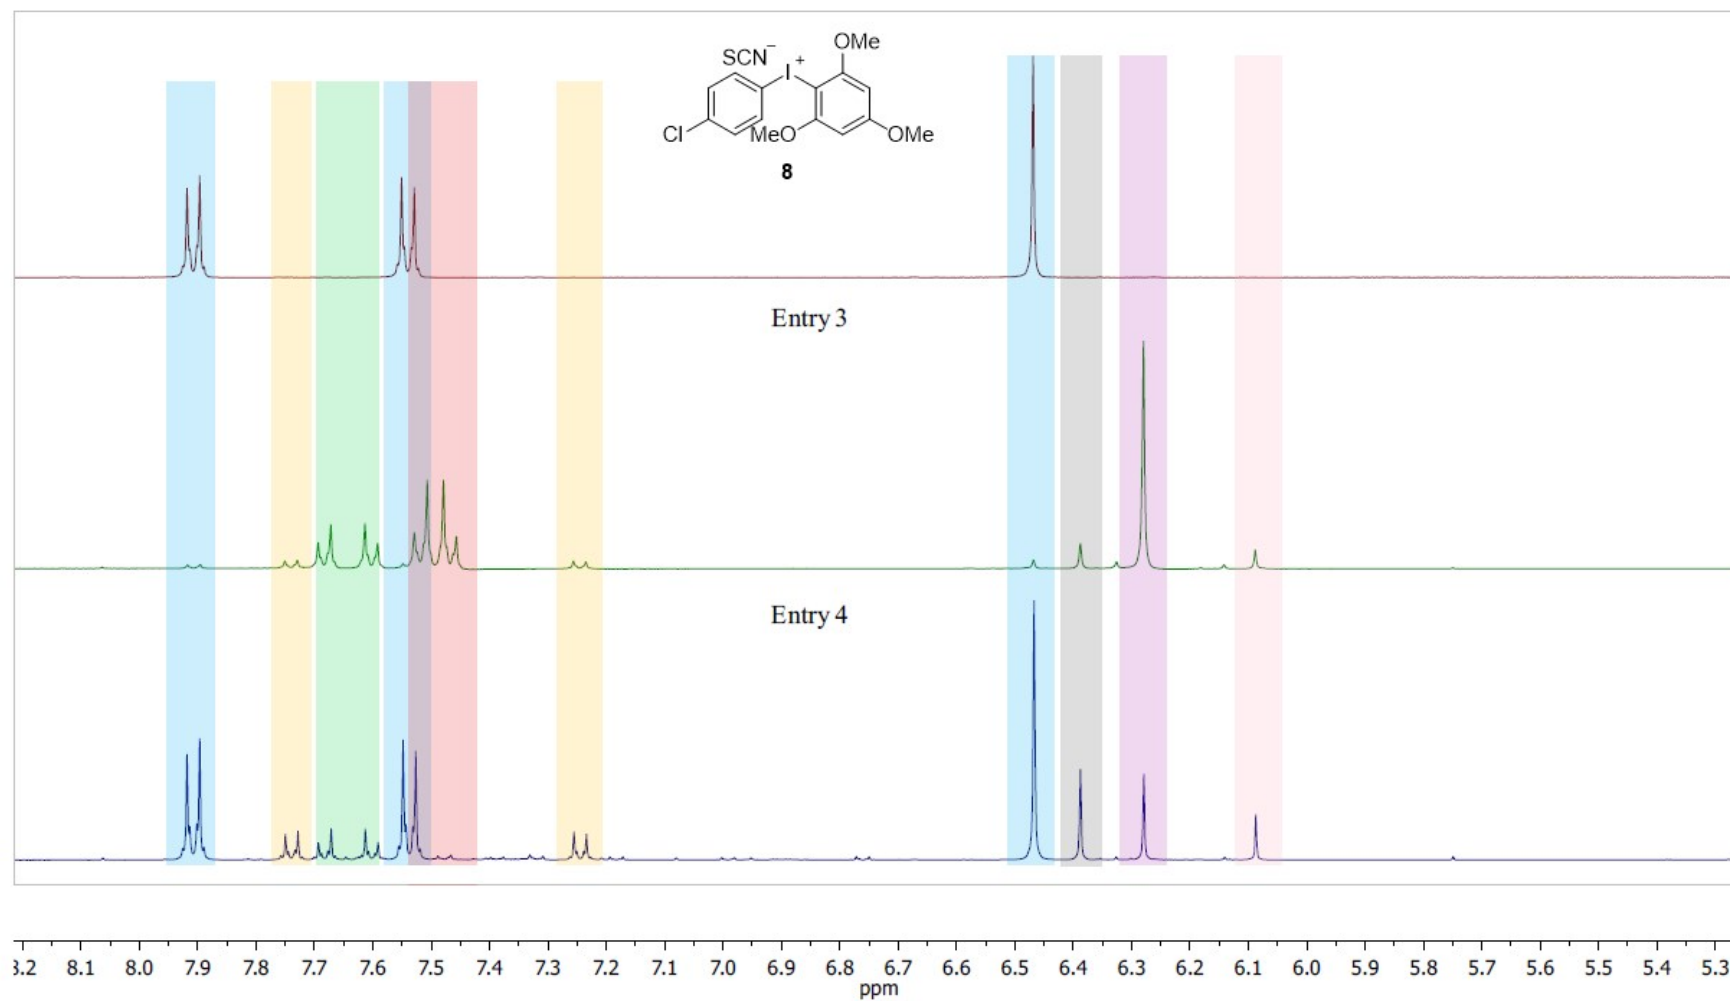

Entry 3

Chromatogram

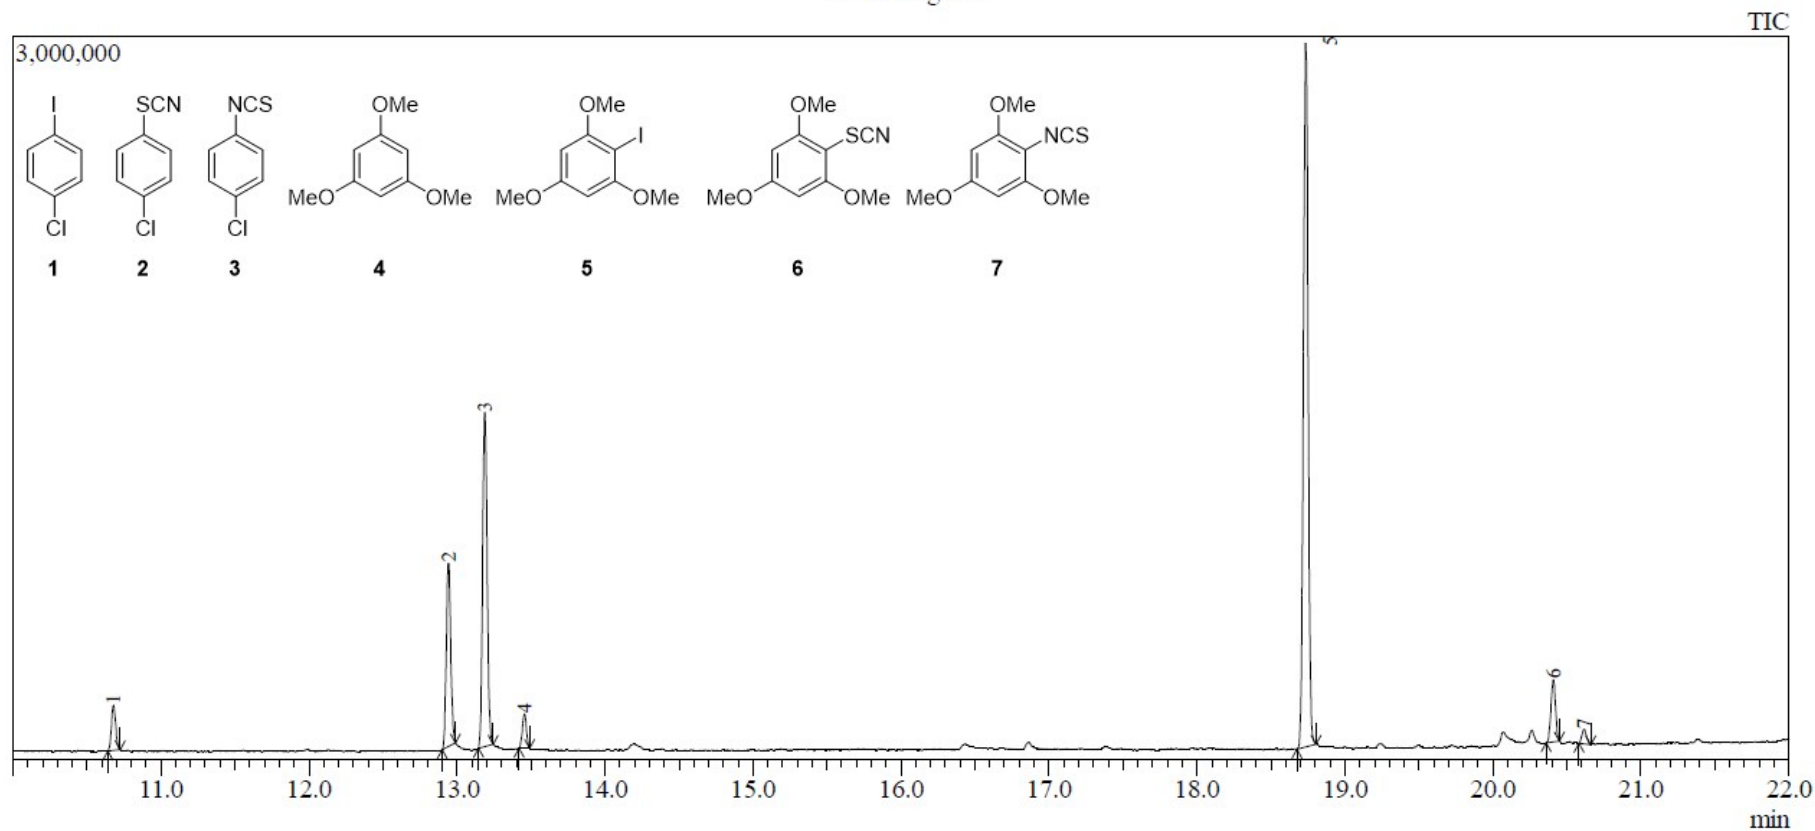

Peak Report TIC

| Peak# | R.Time | Area    | Area% | Height  | Height% | A/H  |
|-------|--------|---------|-------|---------|---------|------|
| 1     | 10.679 | 372226  | 3.03  | 187125  | 3.28    | 1.99 |
| 2     | 12.942 | 1585034 | 12.90 | 759102  | 13.30   | 2.09 |
| 3     | 13.187 | 2930473 | 23.86 | 1382350 | 24.23   | 2.12 |
| 4     | 13.456 | 272790  | 2.22  | 143448  | 2.51    | 1.90 |
| 5     | 18.736 | 6434364 | 52.38 | 2914320 | 51.08   | 2.21 |
| 6     | 20.408 | 560227  | 4.56  | 259064  | 4.54    | 2.16 |
| 7     | 20.616 | 128947  | 1.05  | 60247   | 1.06    | 2.14 |



Entry 4

Chromatogram

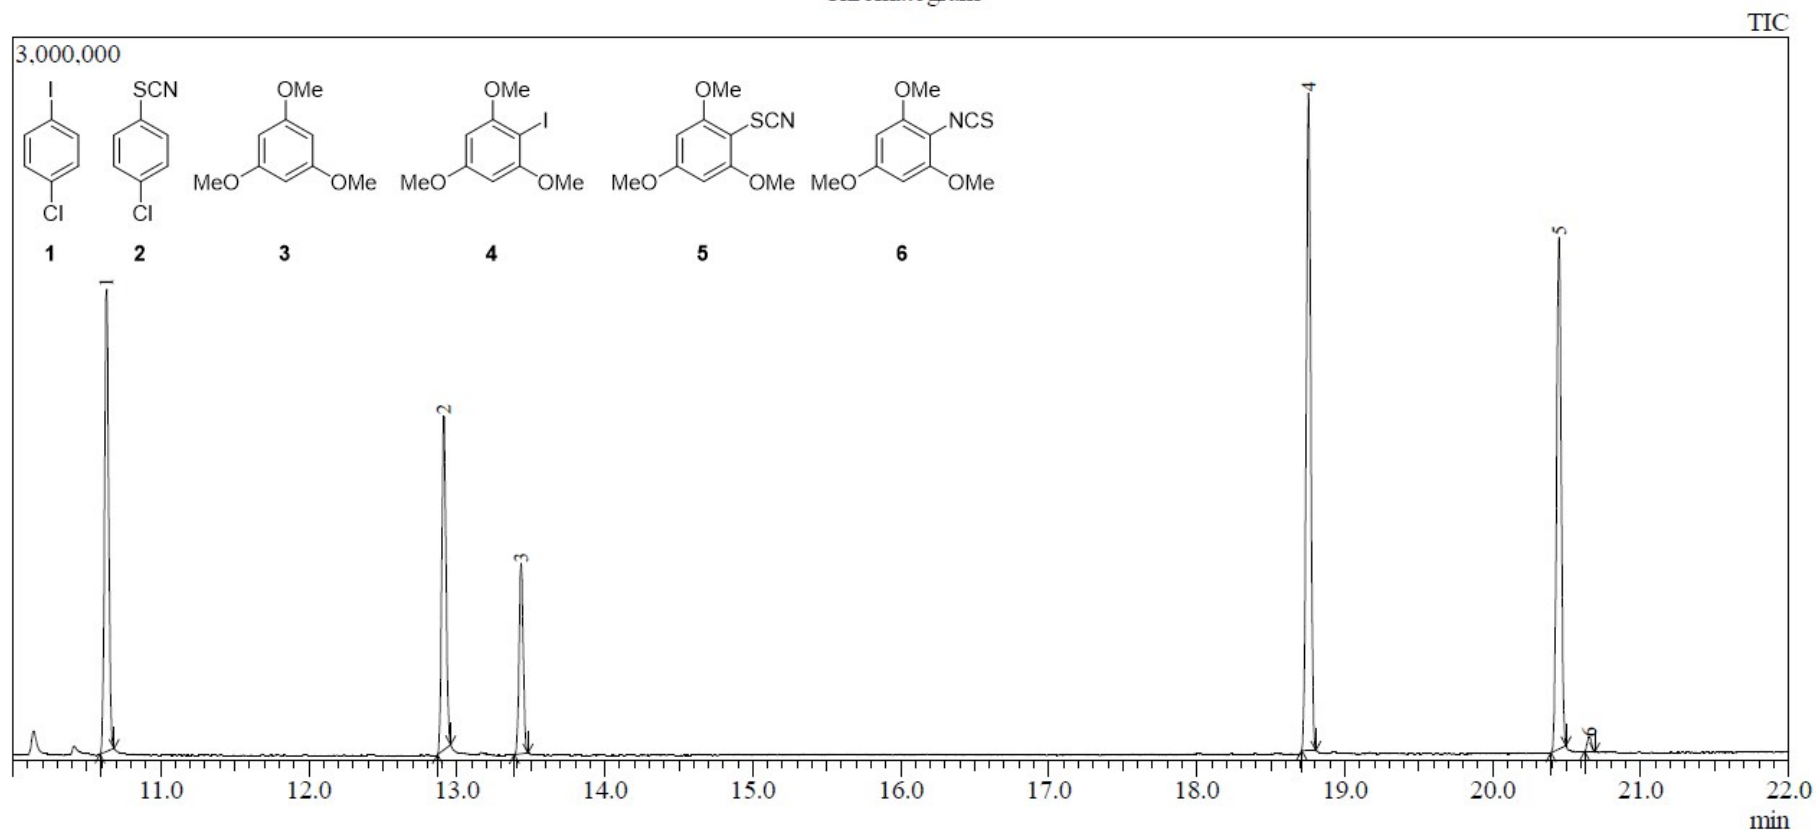

| Peak# | R.Time | Area     | Area%  | Peak Report TIC |         | A/H  |
|-------|--------|----------|--------|-----------------|---------|------|
|       |        |          |        | Height          | Height% |      |
| 1     | 10.633 | 3671864  | 19.96  | 1914135         | 21.31   | 1.92 |
| 2     | 12.912 | 2801889  | 15.23  | 1384802         | 15.41   | 2.02 |
| 3     | 13.434 | 1528770  | 8.31   | 788390          | 8.78    | 1.94 |
| 4     | 18.755 | 5657692  | 30.76  | 2719870         | 30.27   | 2.08 |
| 5     | 20.448 | 4609361  | 25.06  | 2118072         | 23.58   | 2.18 |
| 6     | 20.653 | 122406   | 0.67   | 58988           | 0.66    | 2.08 |
|       |        | 18391982 | 100.00 | 8984257         | 100.00  |      |

NMR  $^1\text{H}$  (400 Hz,  $\text{DMSO-}d_6$ )

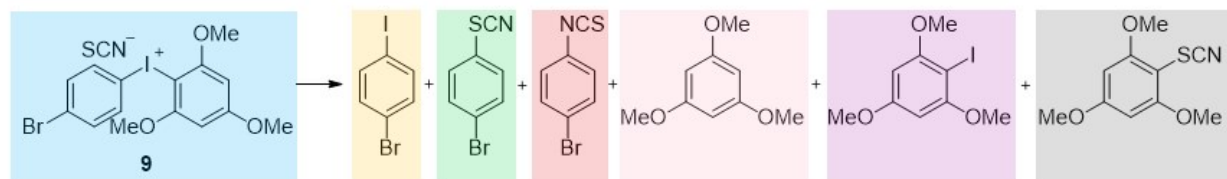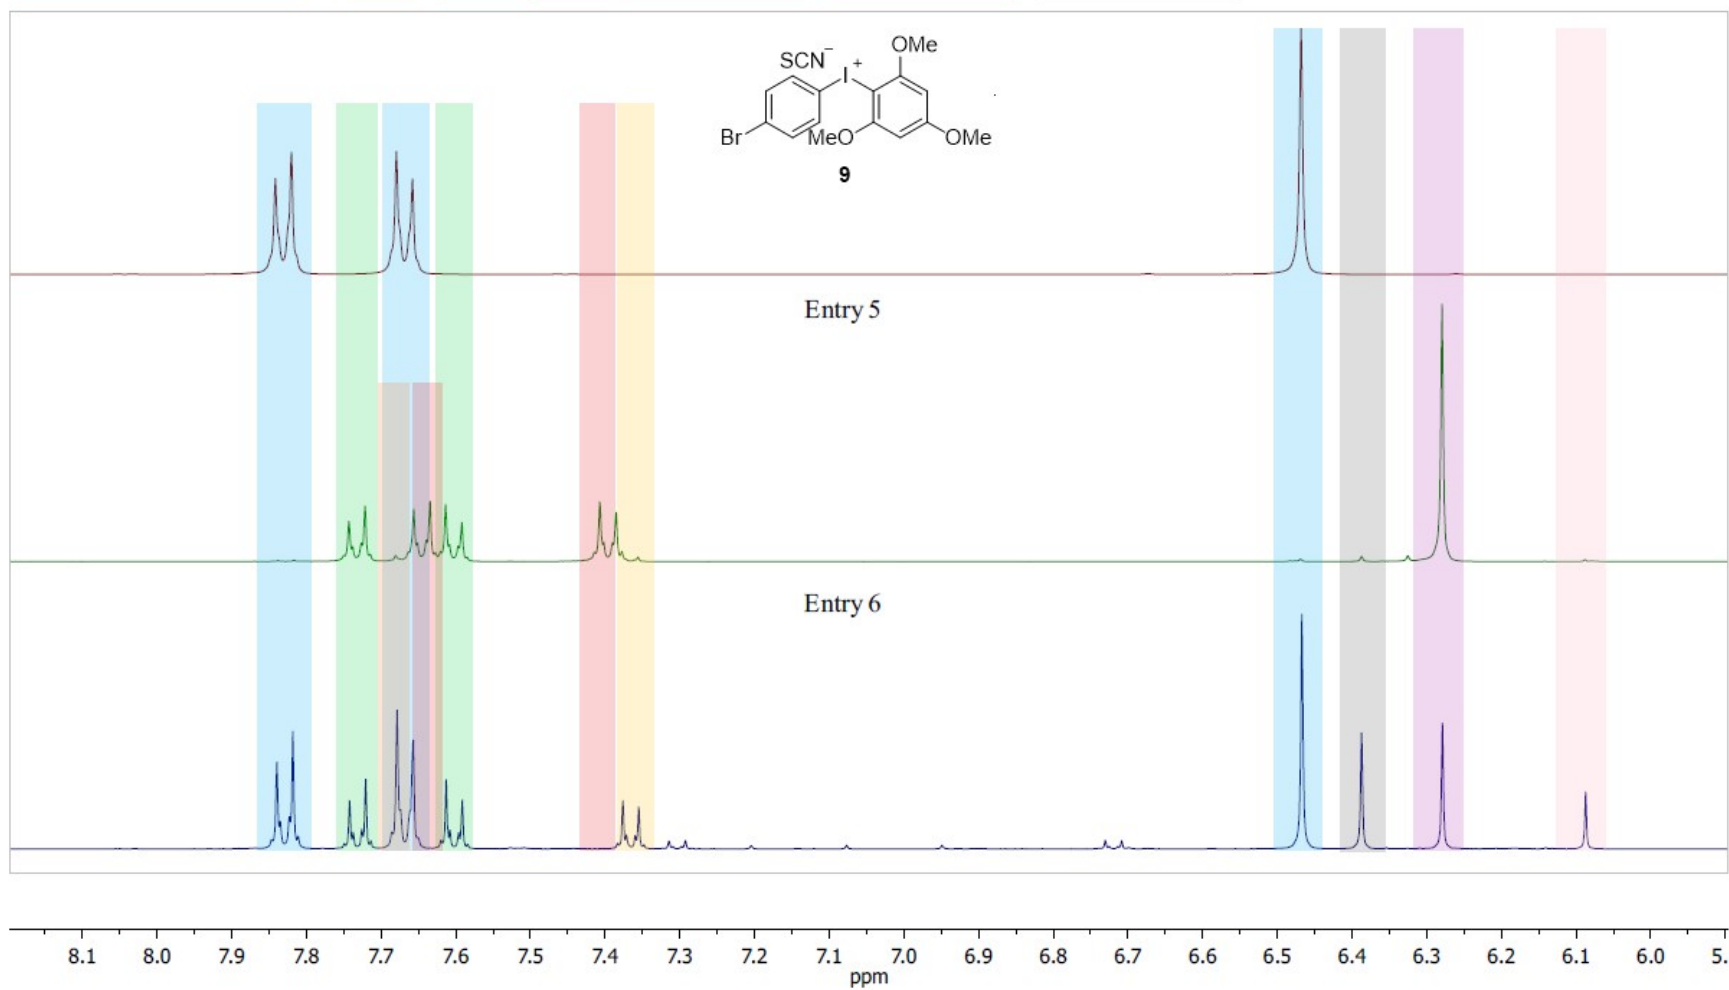

Entry 5

Chromatogram

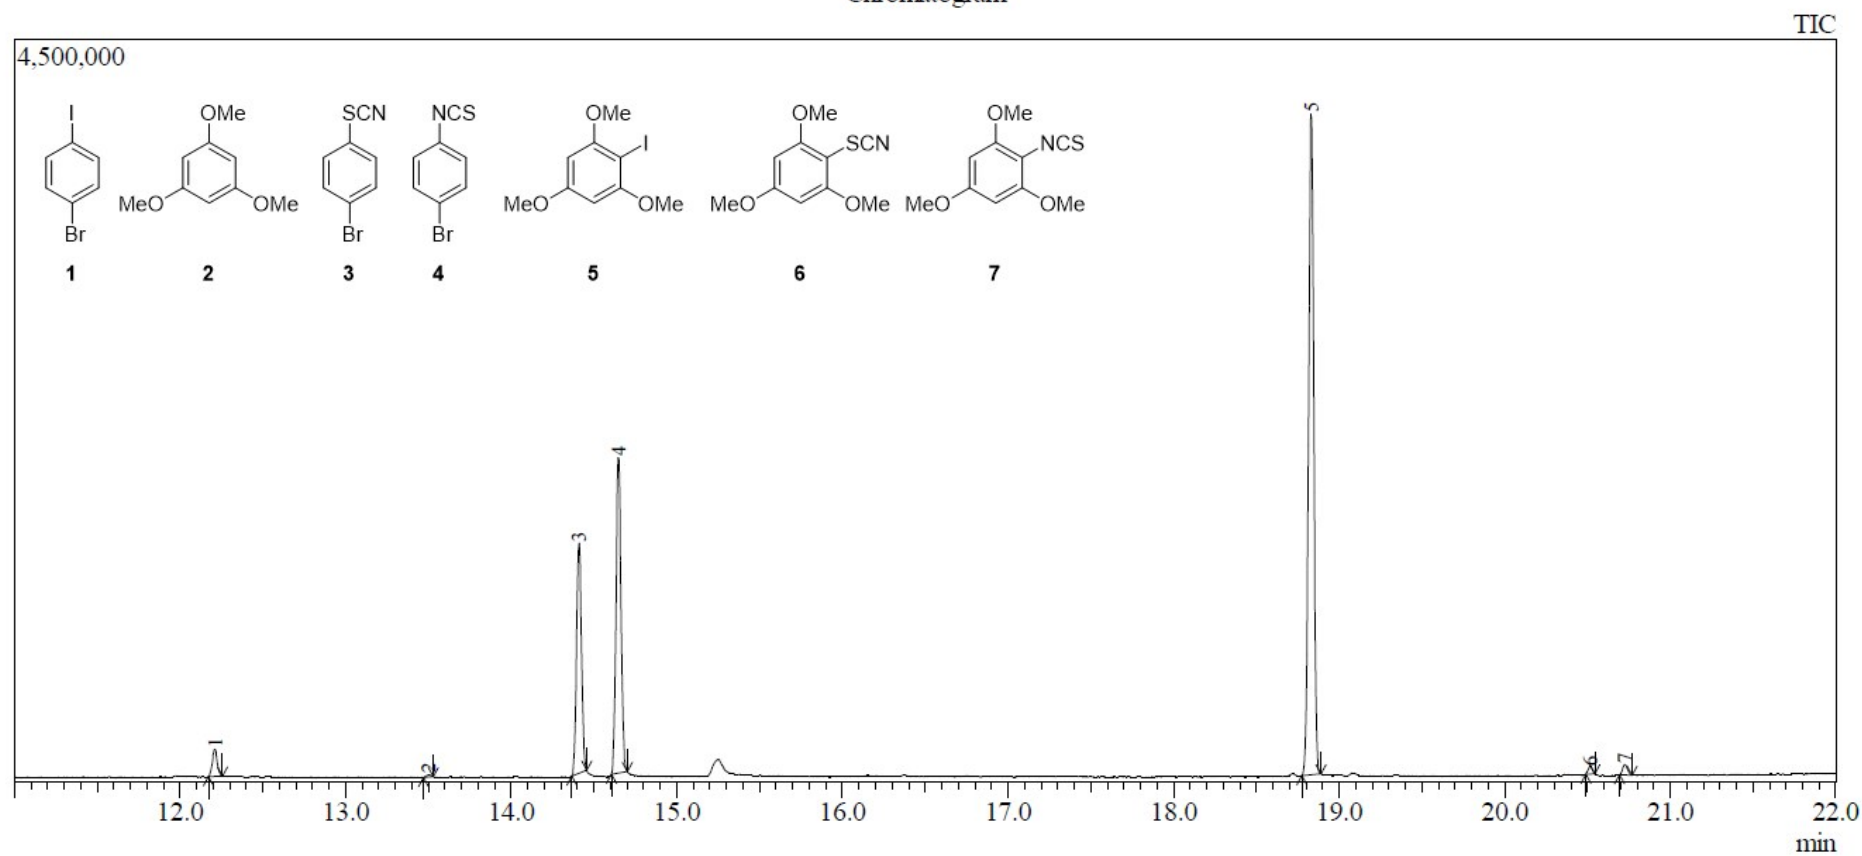

Peak Report TIC

| Peak# | R.Time | Area    | Area% | Height  | Height% | A/H  |
|-------|--------|---------|-------|---------|---------|------|
| 1     | 12.209 | 341063  | 2.12  | 166784  | 2.19    | 2.04 |
| 2     | 13.502 | 24989   | 0.16  | 14086   | 0.19    | 1.77 |
| 3     | 14.409 | 2882980 | 17.91 | 1394799 | 18.34   | 2.07 |
| 4     | 14.647 | 4026786 | 25.01 | 1913294 | 25.16   | 2.10 |
| 5     | 18.832 | 8612191 | 53.49 | 4004661 | 52.67   | 2.15 |
| 6     | 20.517 | 82555   | 0.51  | 46764   | 0.62    | 1.77 |
| 7     | 20.726 | 129482  | 0.80  | 62989   | 0.83    | 2.06 |

# Entry 6

Chromatogram

TIC

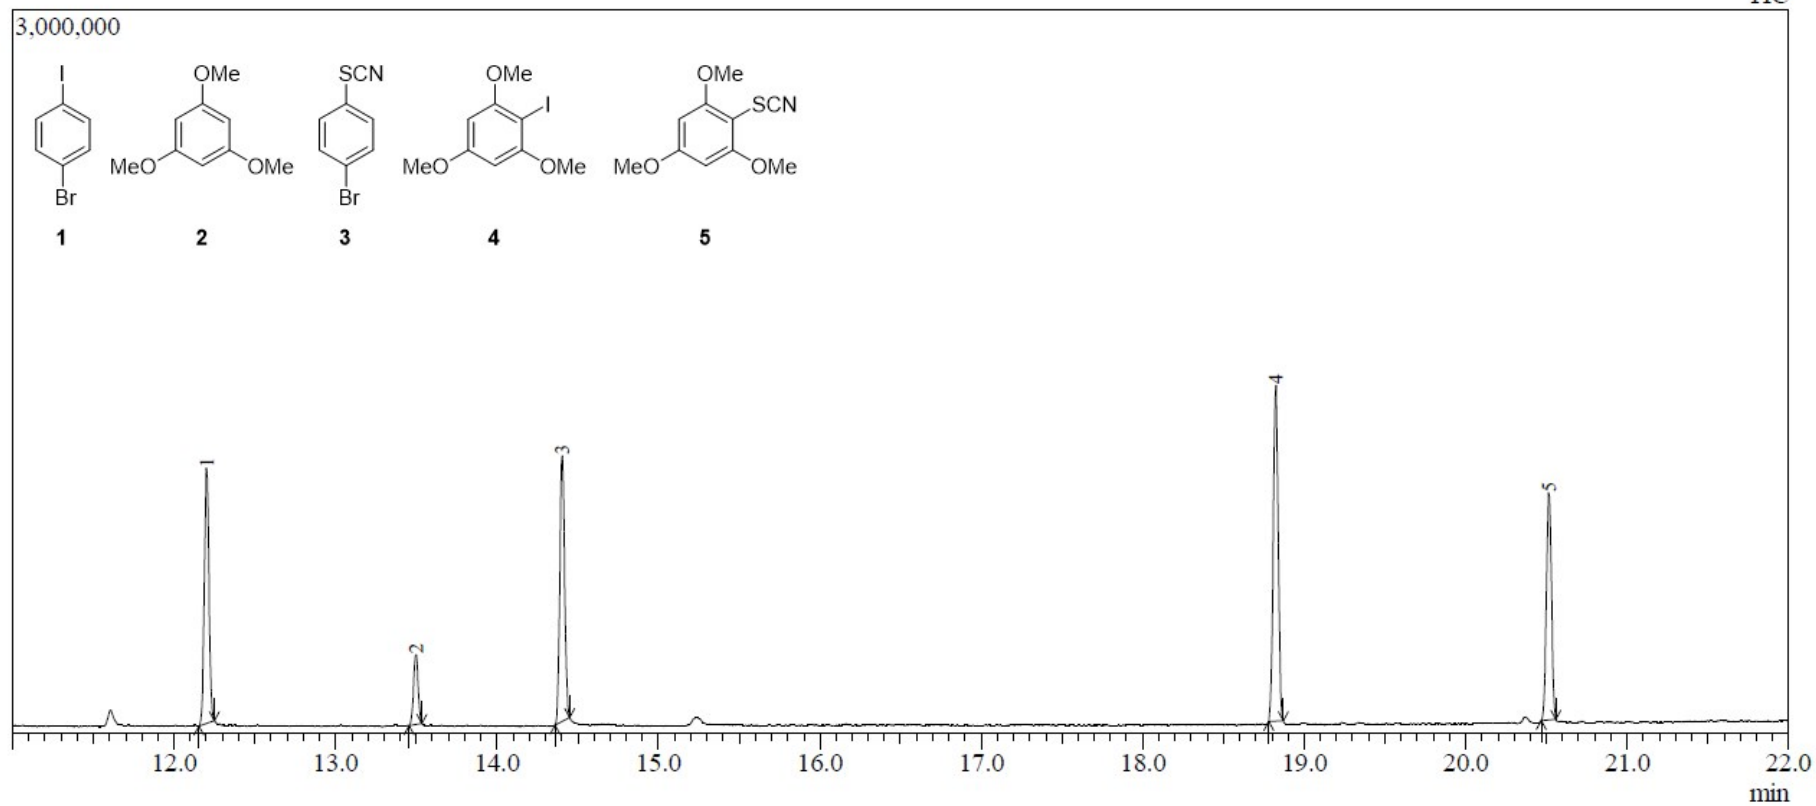

| Peak Report TIC |        |         |        |         |         |      |
|-----------------|--------|---------|--------|---------|---------|------|
| Peak#           | R.Time | Area    | Area%  | Height  | Height% | A/H  |
| 1               | 12.202 | 2145771 | 21.50  | 1056637 | 22.11   | 2.03 |
| 2               | 13.498 | 563869  | 5.65   | 288669  | 6.04    | 1.95 |
| 3               | 14.404 | 2273595 | 22.78  | 1099429 | 23.01   | 2.07 |
| 4               | 18.824 | 2948675 | 29.54  | 1391740 | 29.12   | 2.12 |
| 5               | 20.516 | 2050058 | 20.54  | 942240  | 19.72   | 2.18 |
|                 |        | 9981968 | 100.00 | 4778715 | 100.00  |      |

## Mass-spectrum (EI) of thermolysis products of 4, 8–9

### Iodobenzene<sup>4</sup>

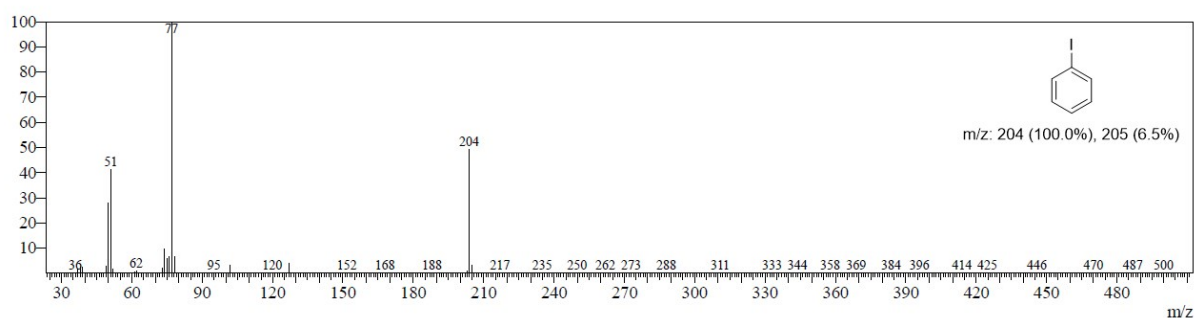

### Thiocyanatobenzene<sup>5</sup>

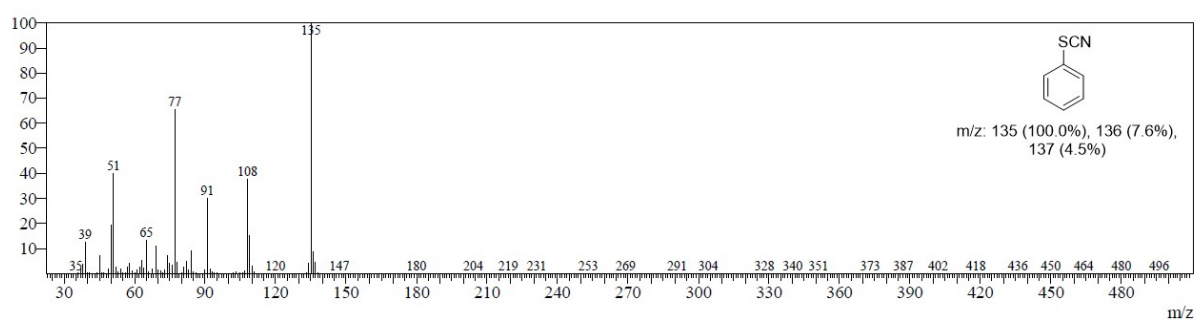

### Isothiocyanatobenzene<sup>4</sup>

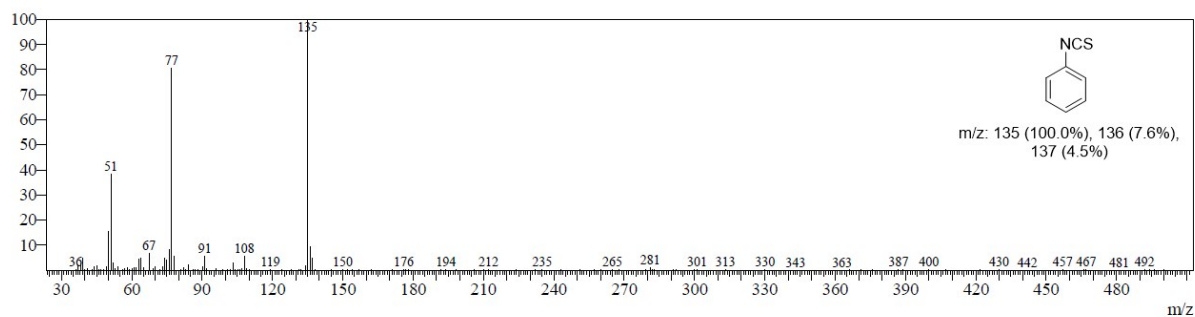

### 1-chloro-4-iodobenzene<sup>4</sup>

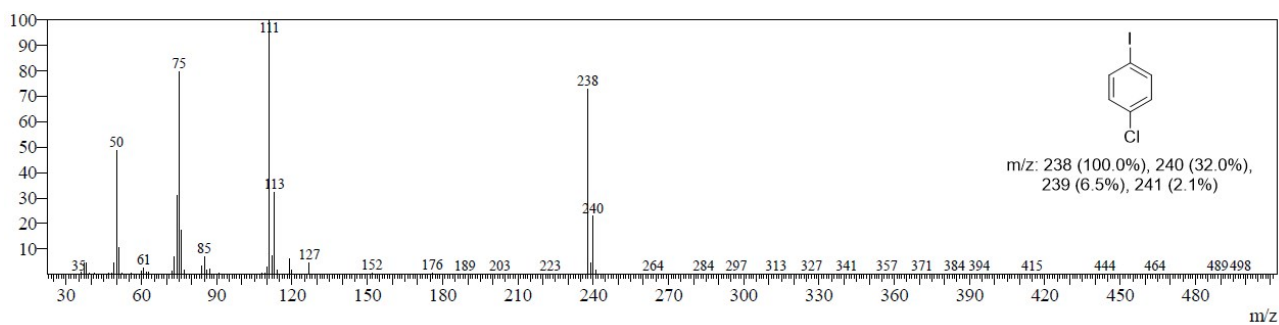

### 1-chloro-4-thiocyanatobenzene<sup>5</sup>

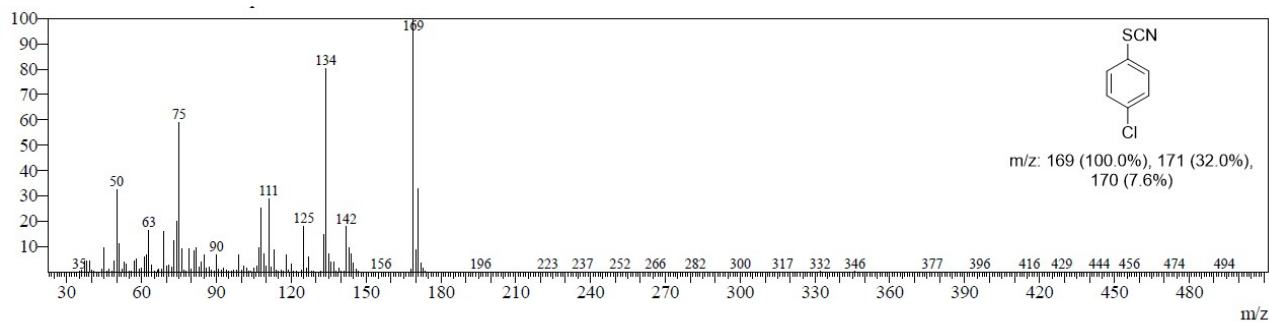

### 1-chloro-4-isothiocyanatobenzene<sup>4</sup>

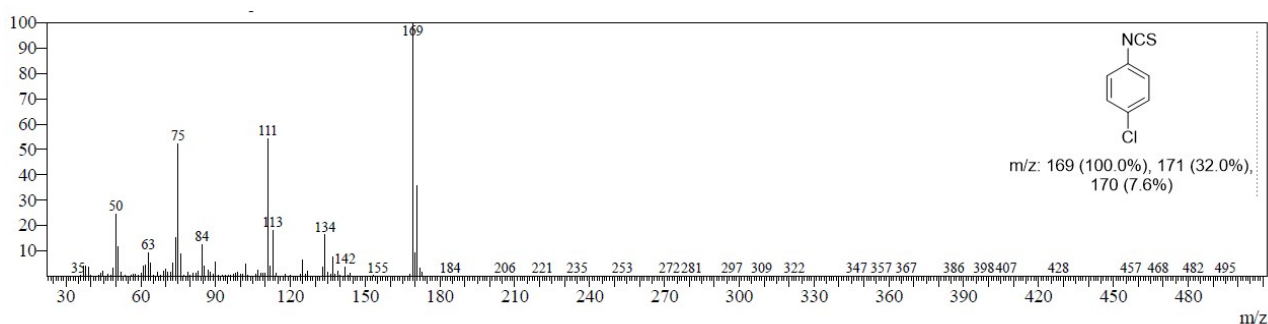

### 1-bromo-4-iodobenzene<sup>4</sup>

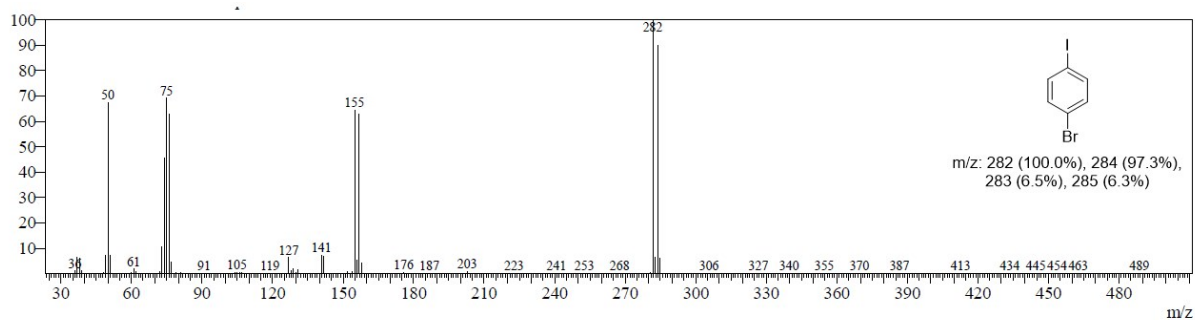

### 1-bromo-4-thiocyanatobenzene<sup>5</sup>

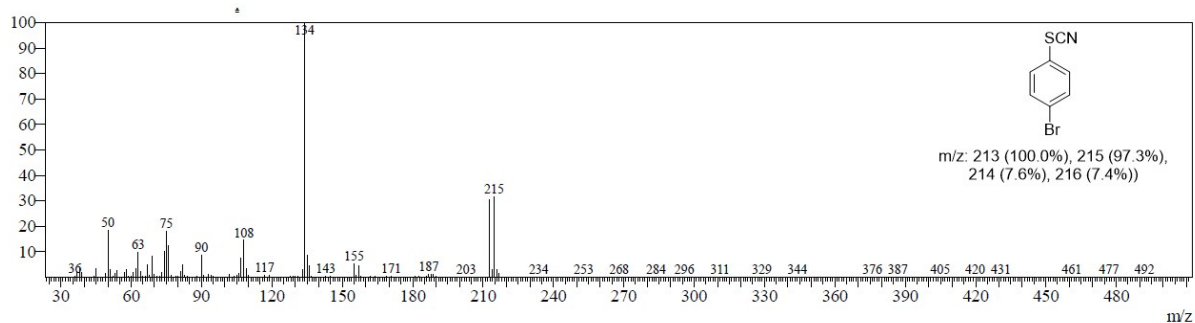

### 1-bromo-4-isothiocyanatobenzene<sup>4</sup>

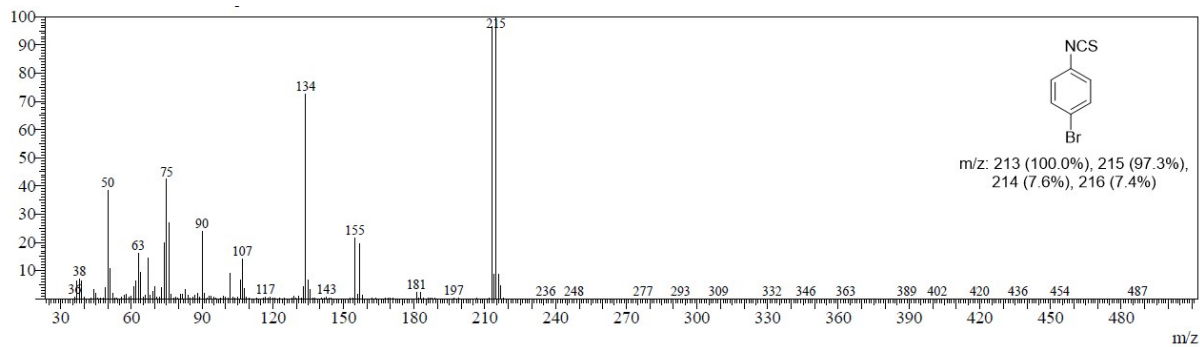

### 1,3,5-trimethoxybenzene<sup>4</sup>

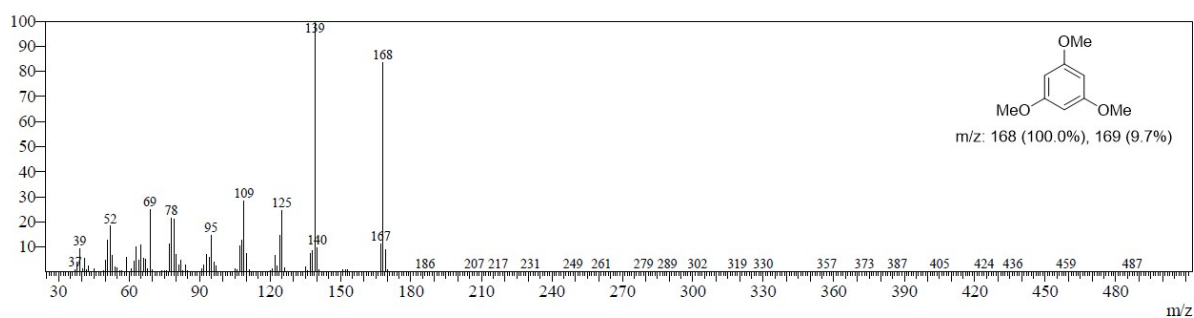

### 2-iodo-1,3,5-trimethoxybenzene<sup>6</sup>

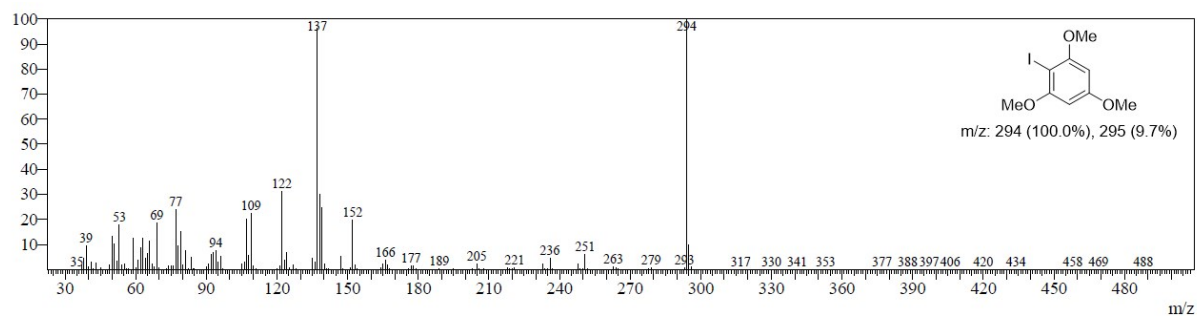

### 1,3,5-trimethoxy-2-thiocyanatobenzene<sup>7</sup>

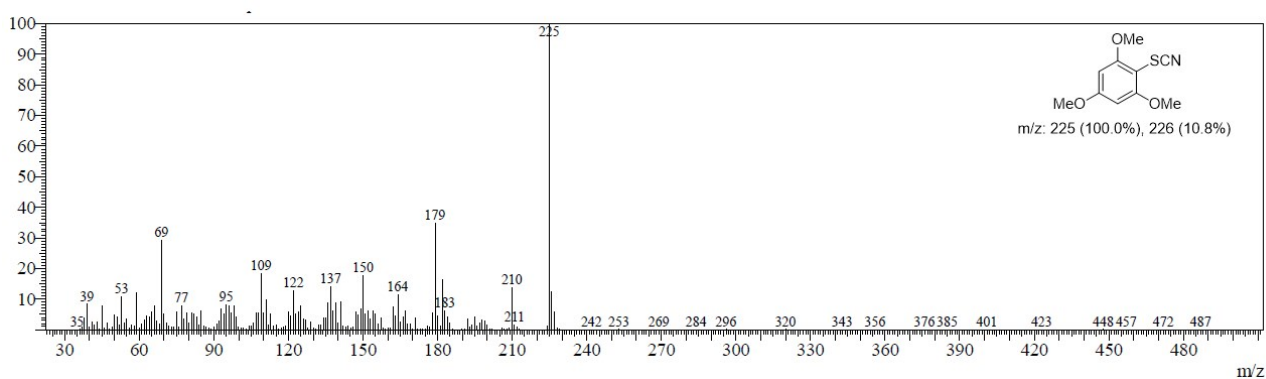

# 1,3,5-trimethoxy-2-isothiocyanatobenzene

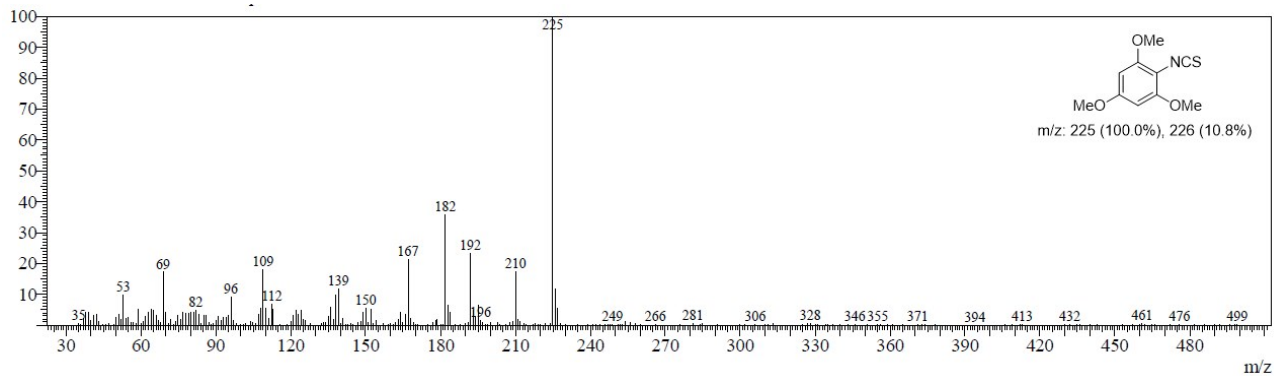



# NMR spectra of products 3-9

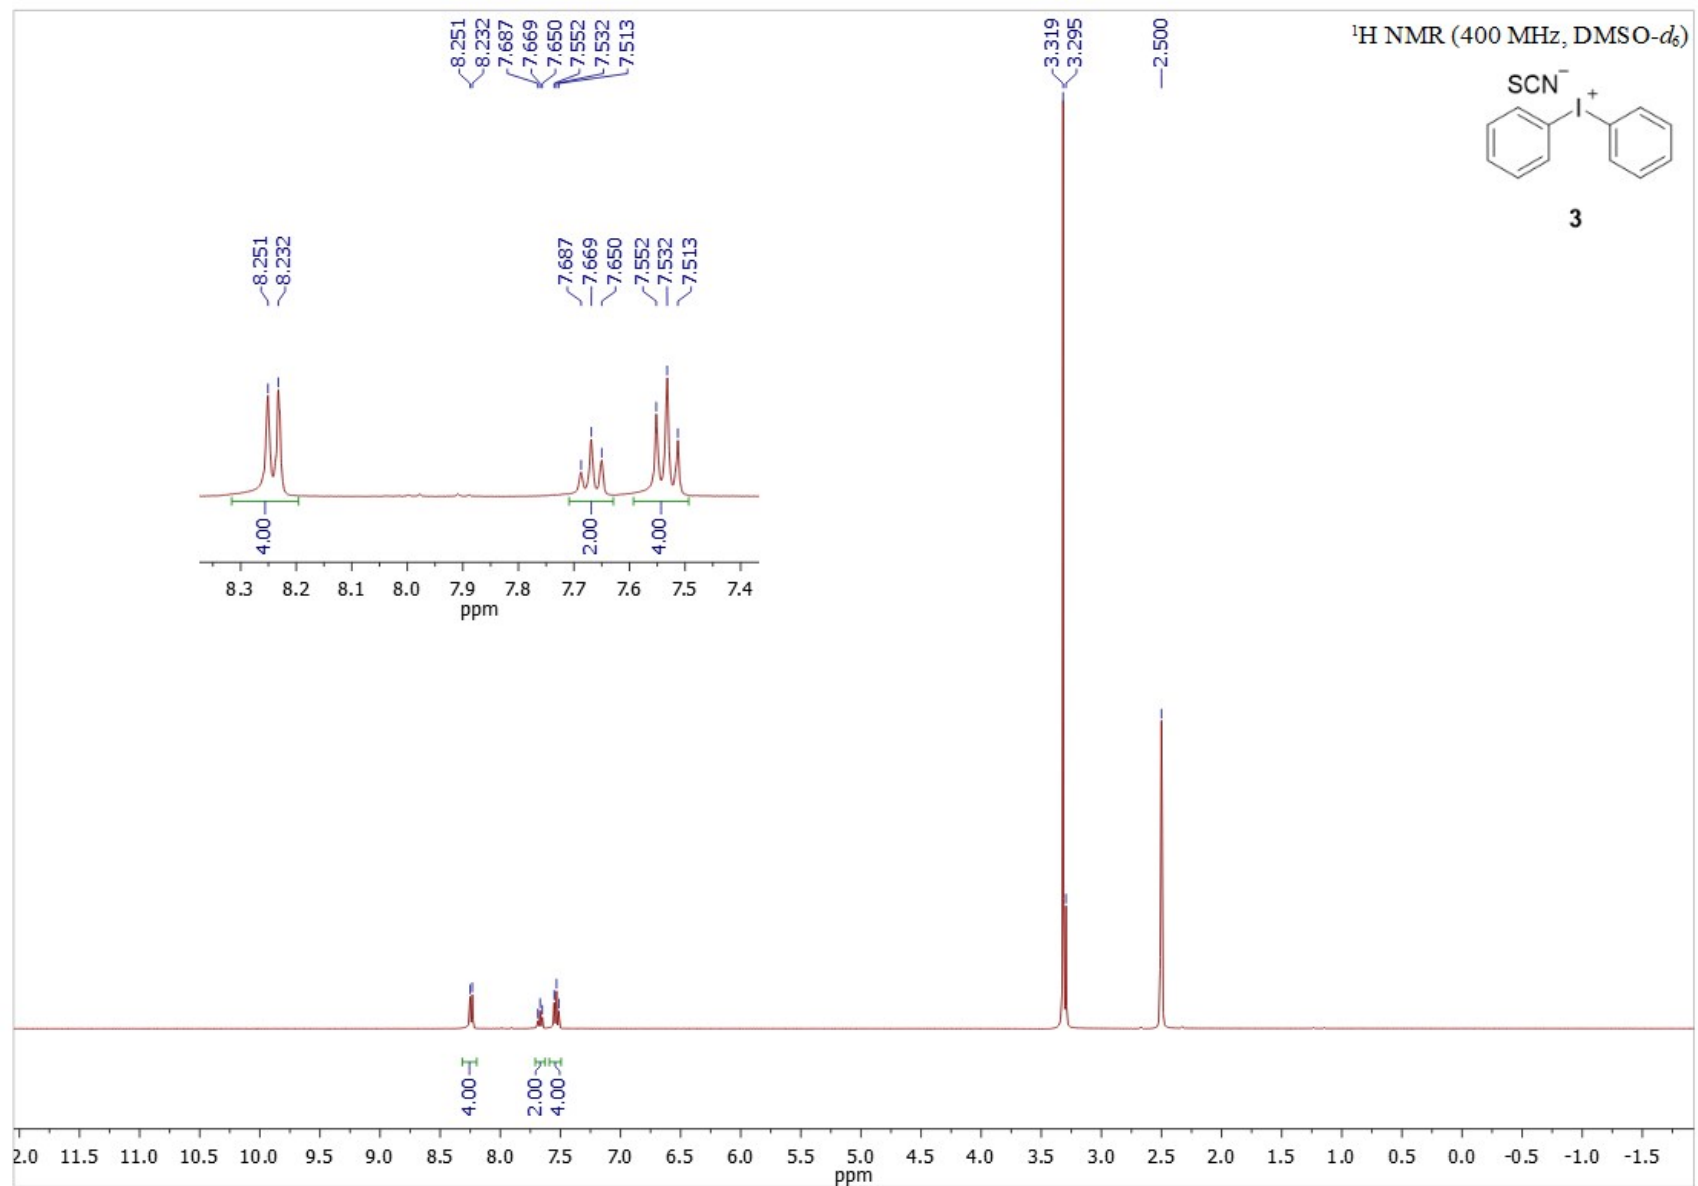

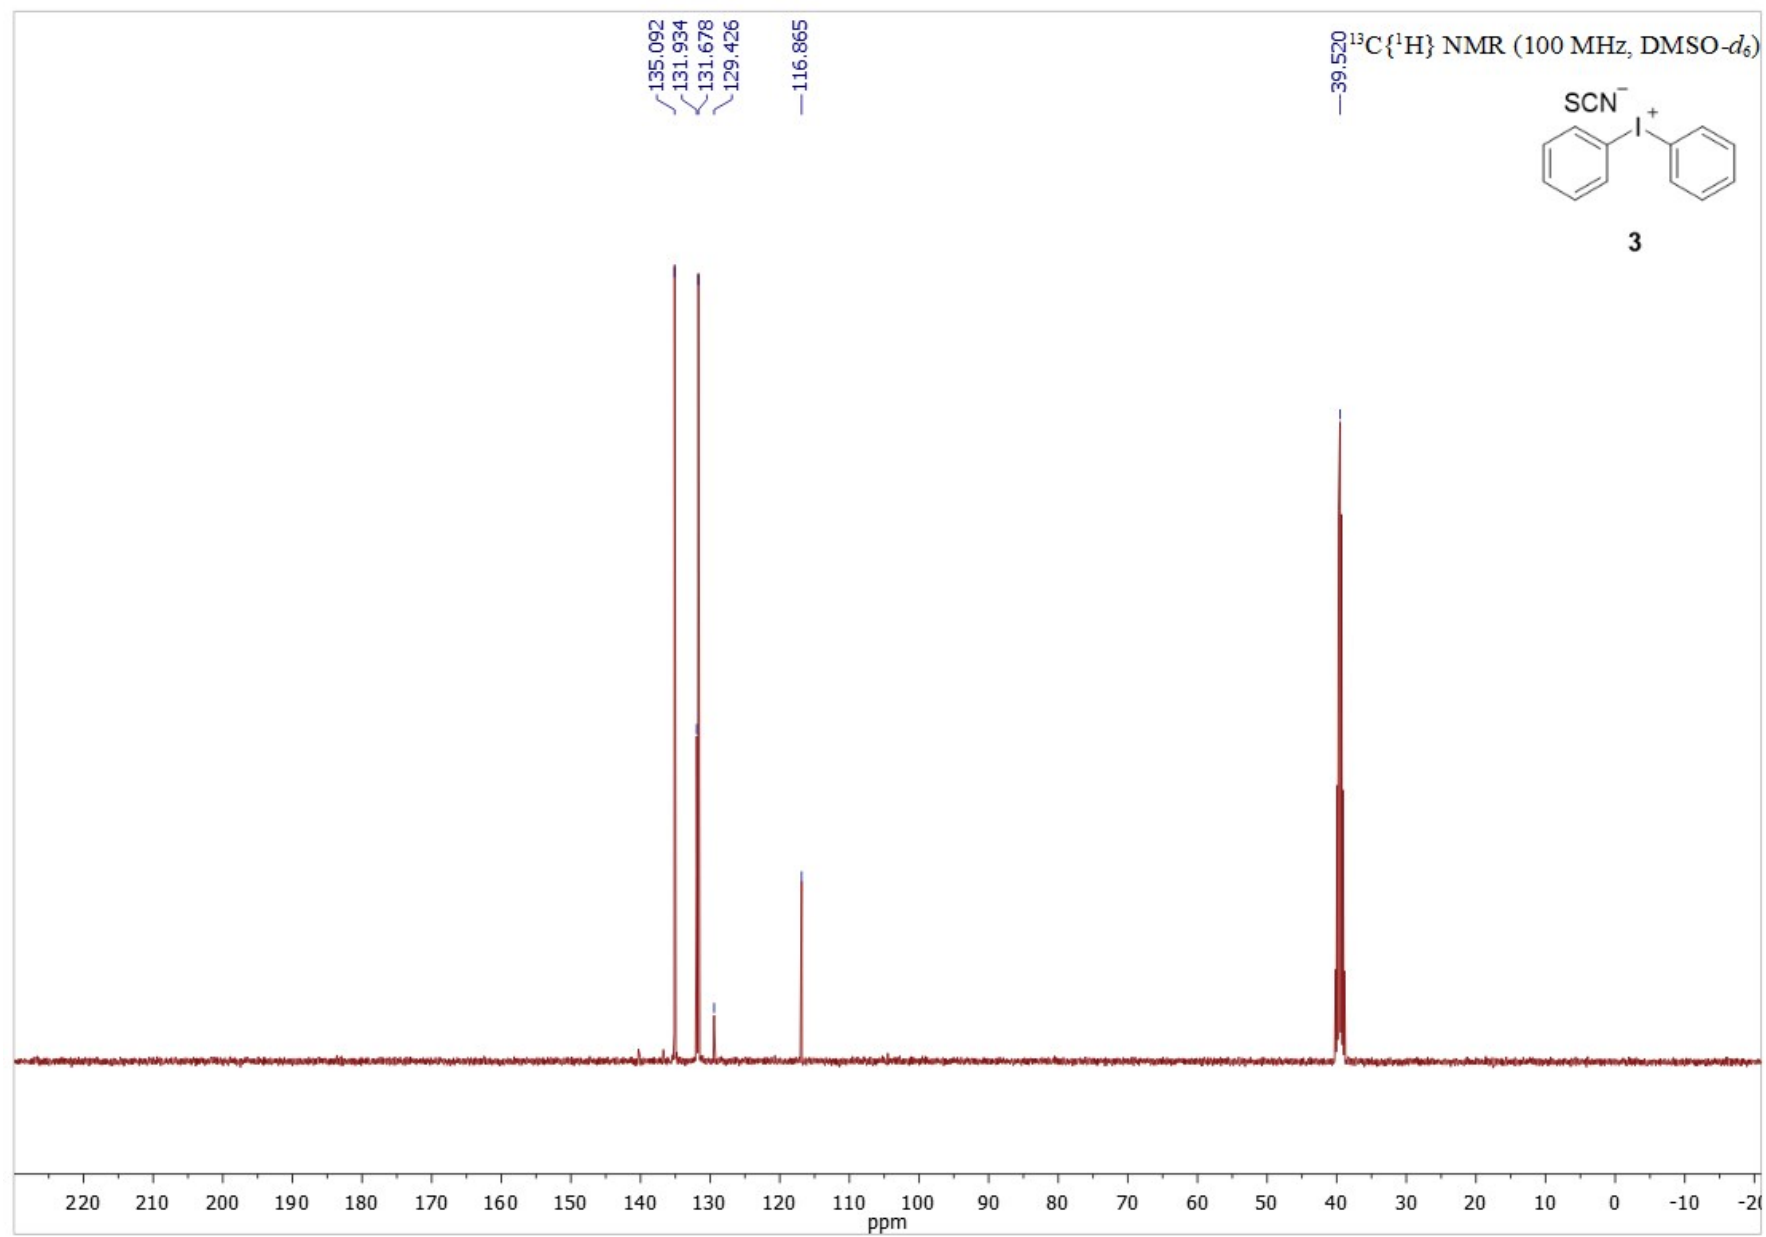

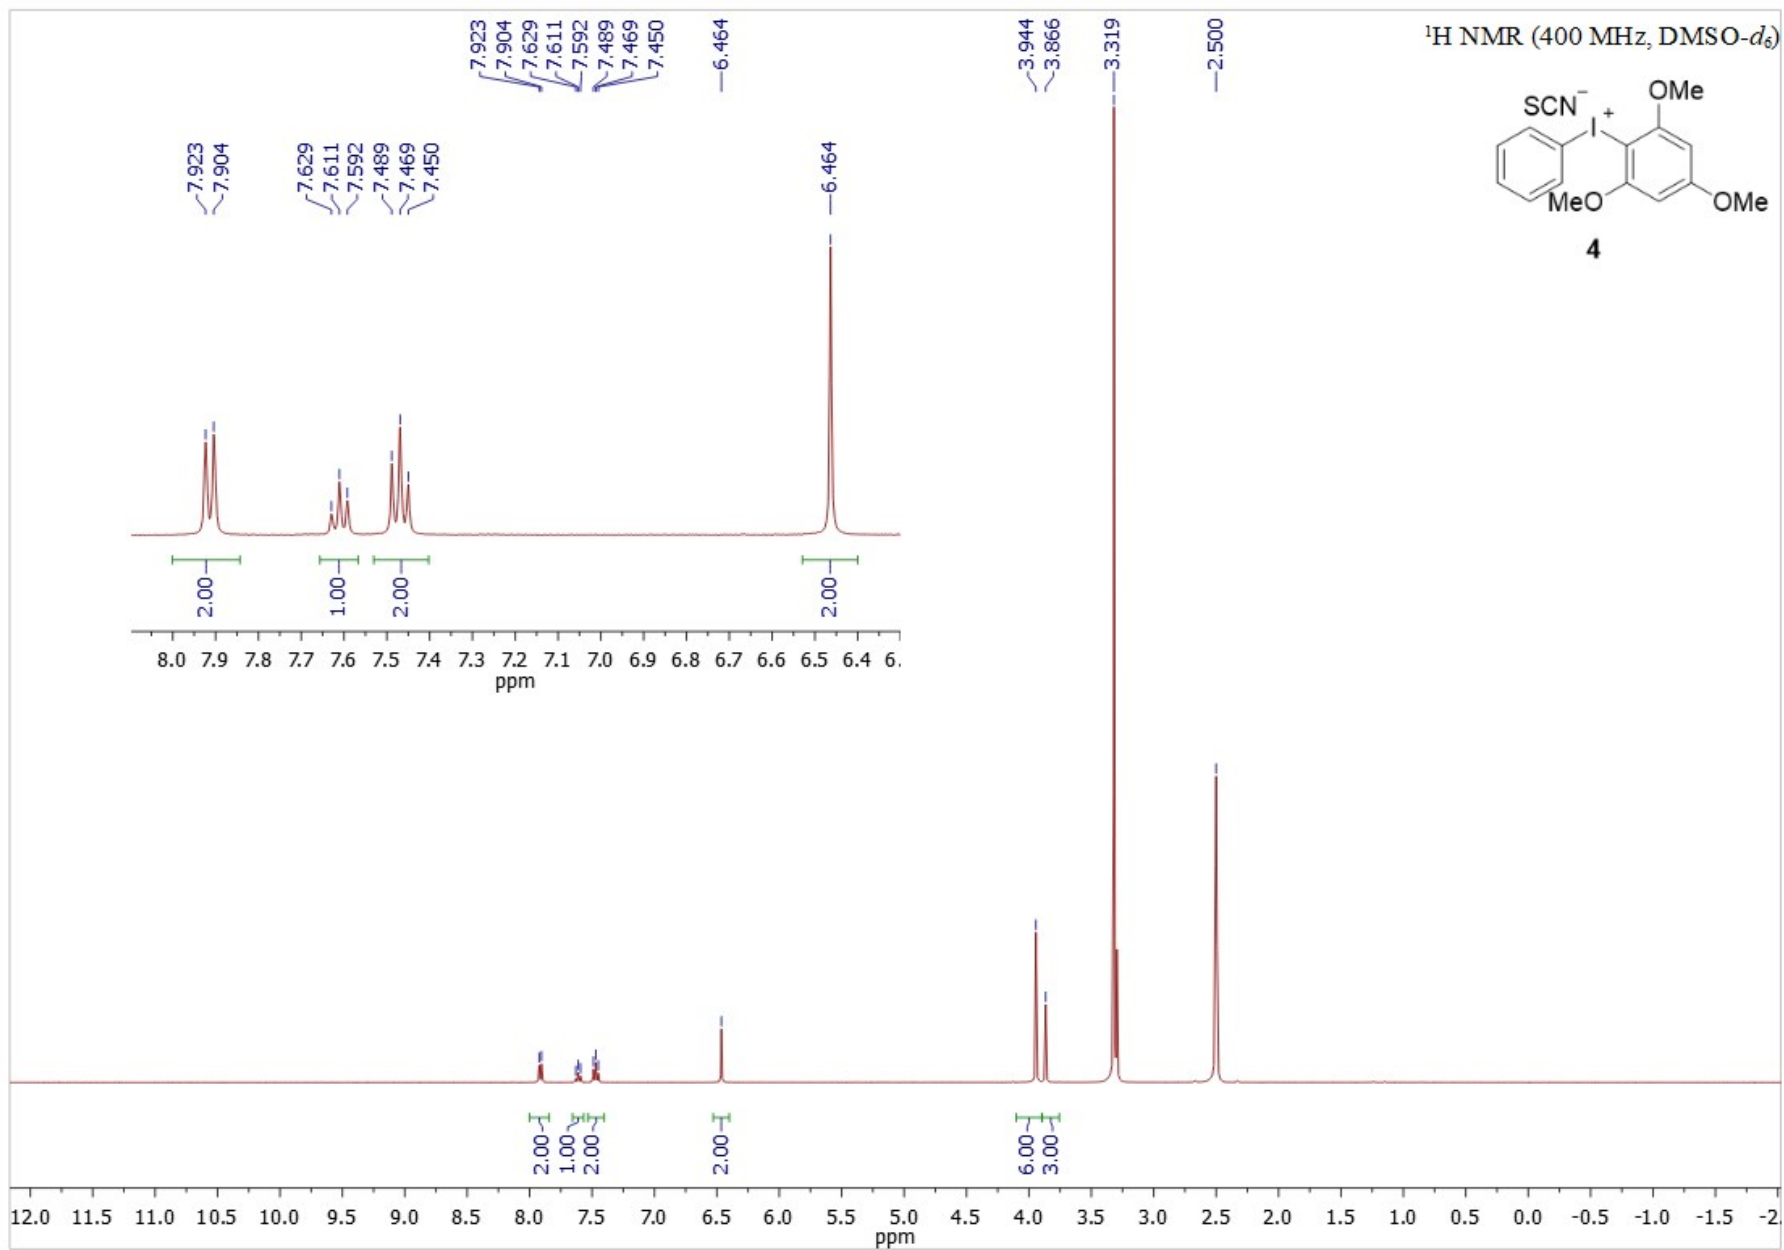

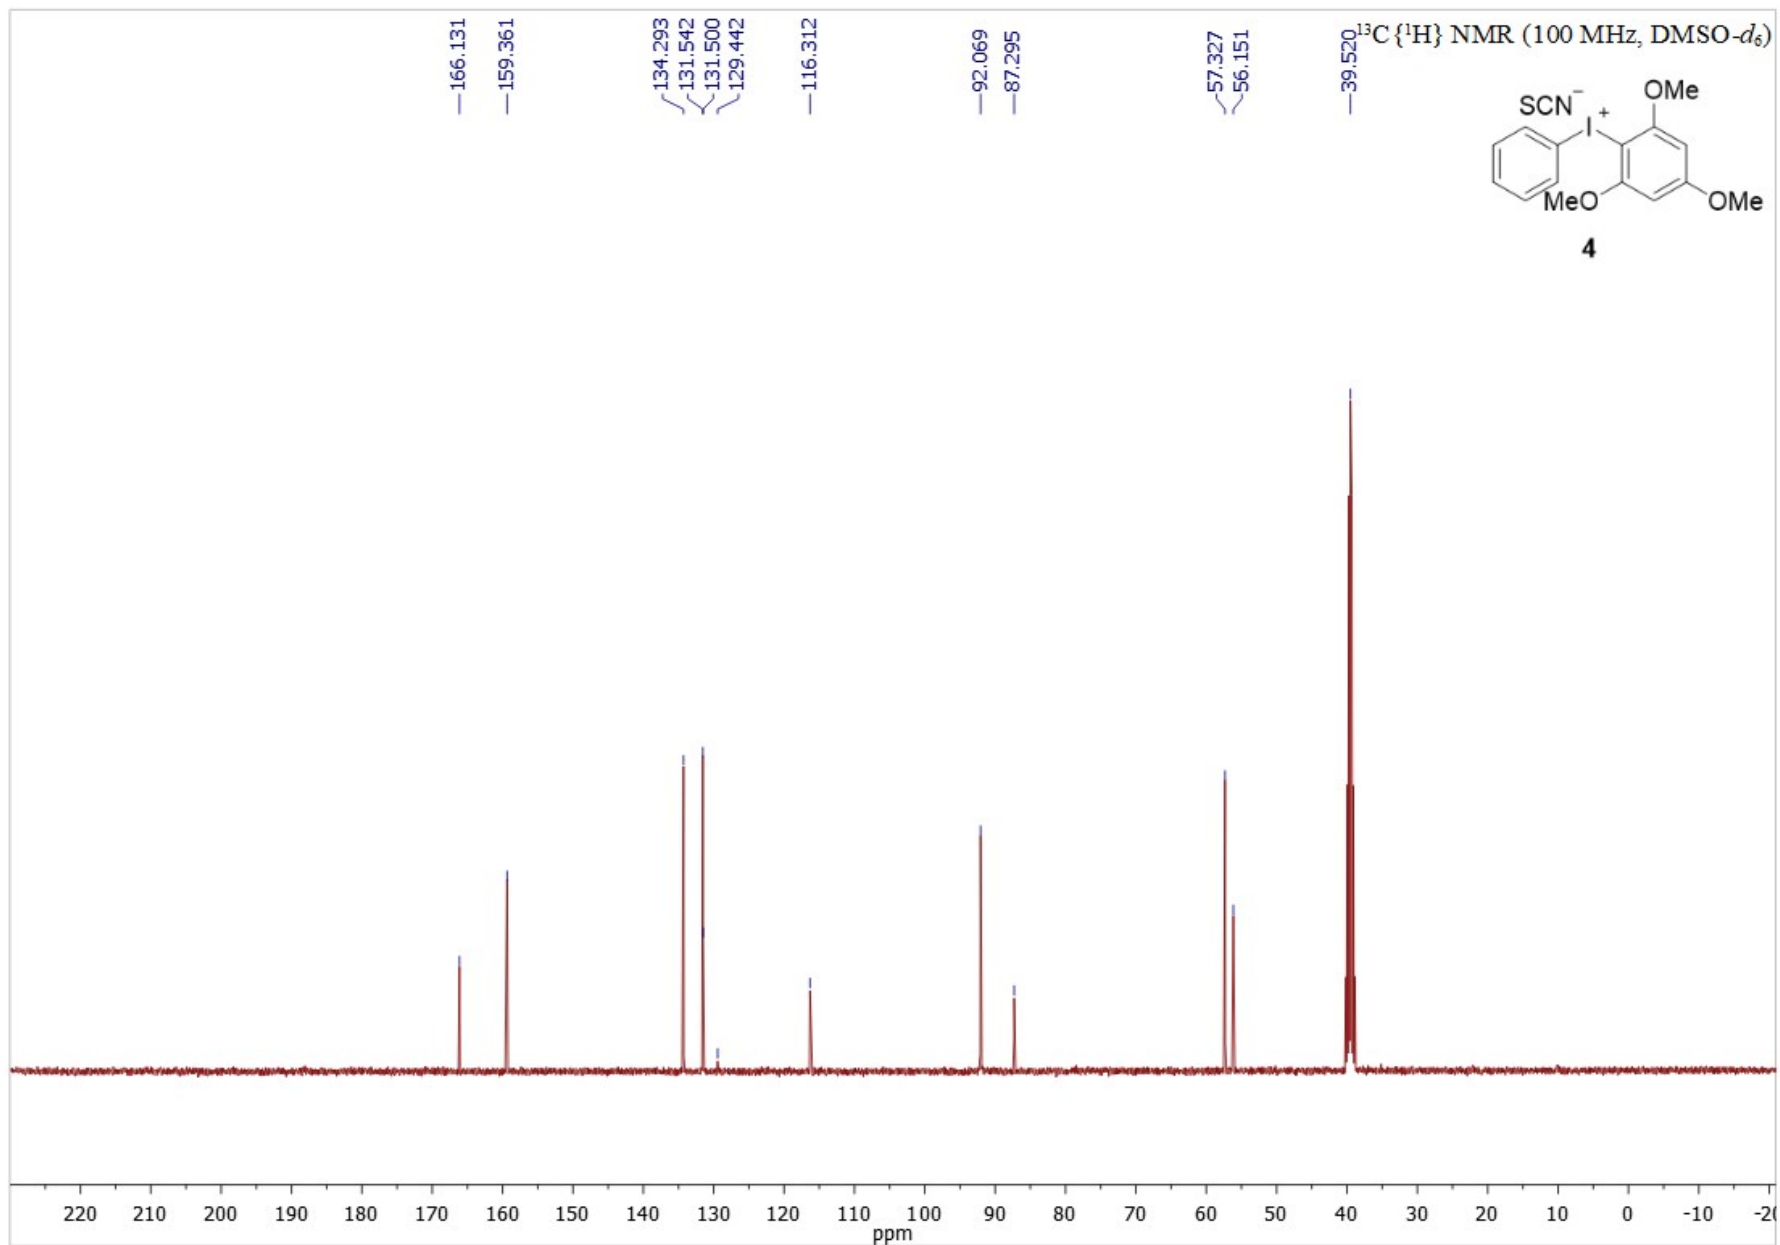

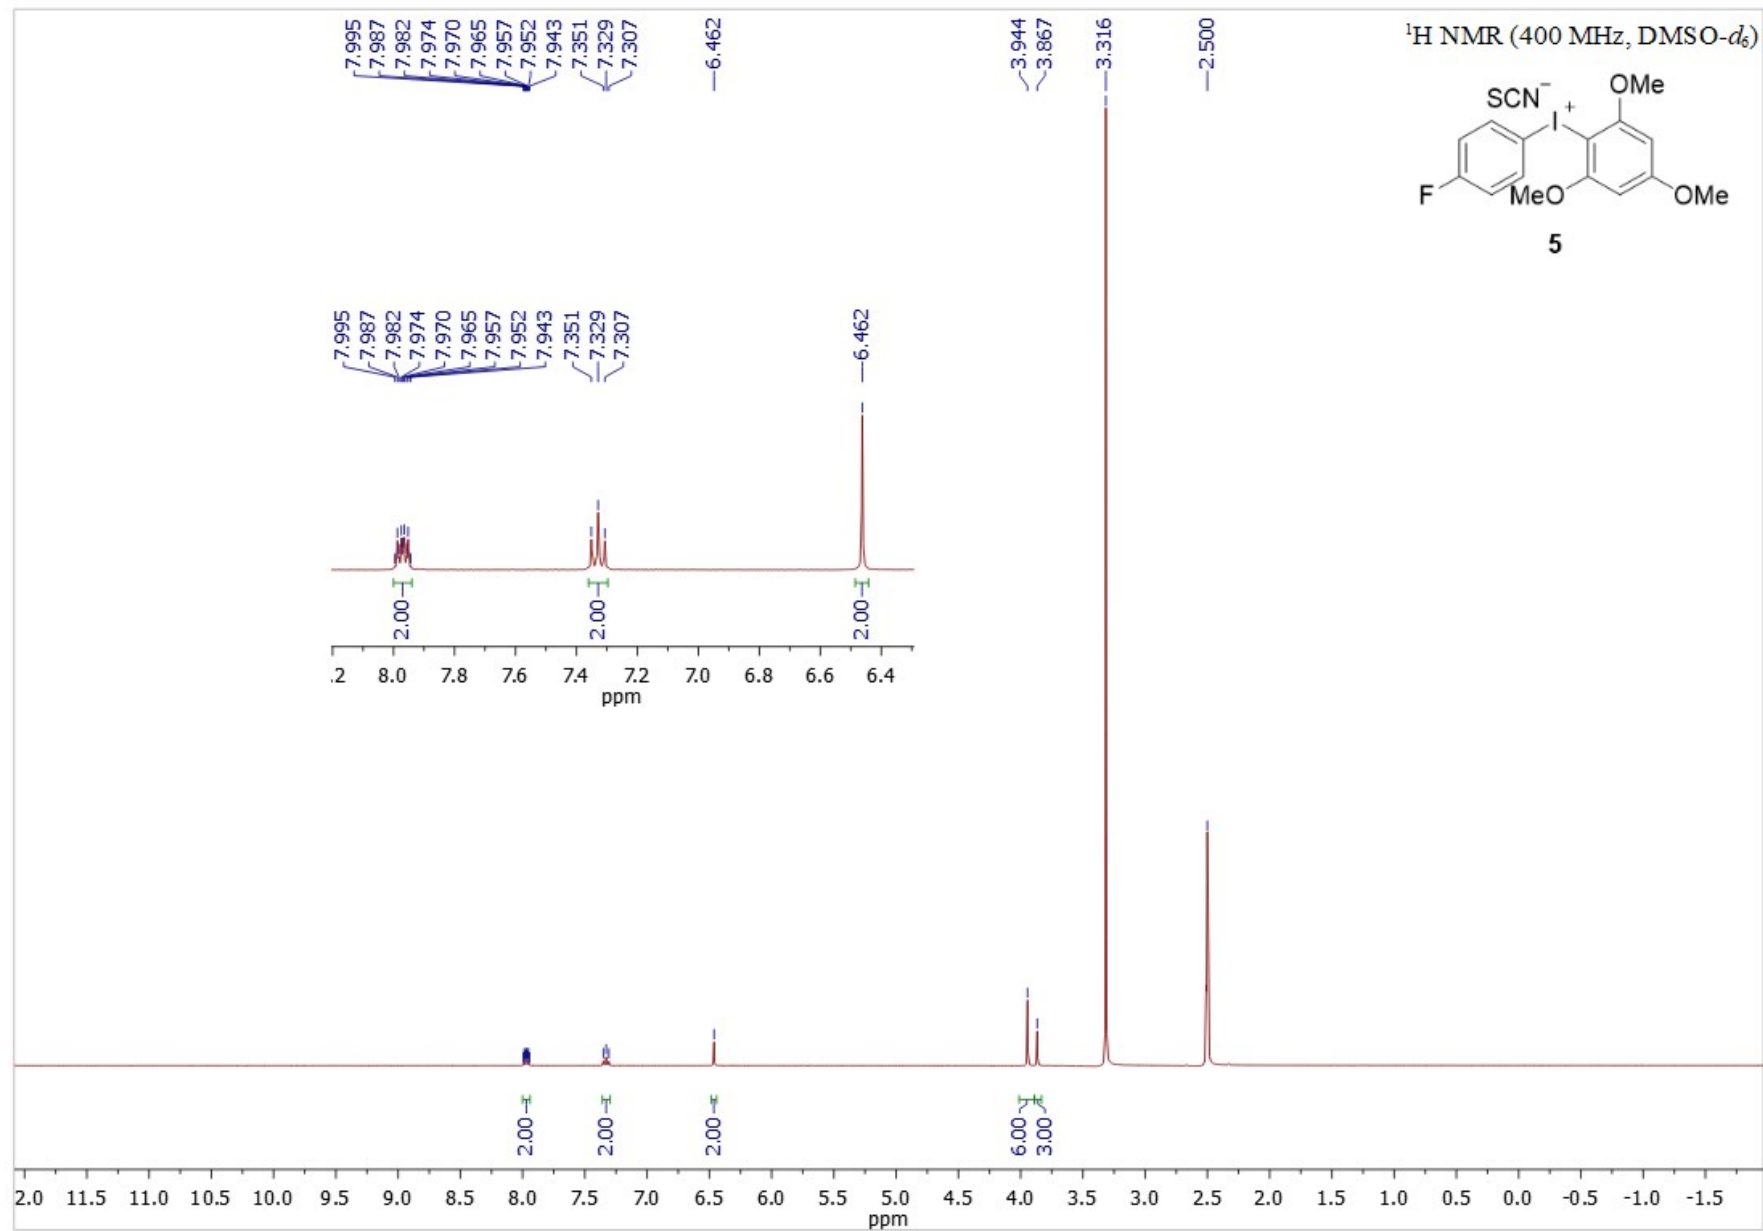

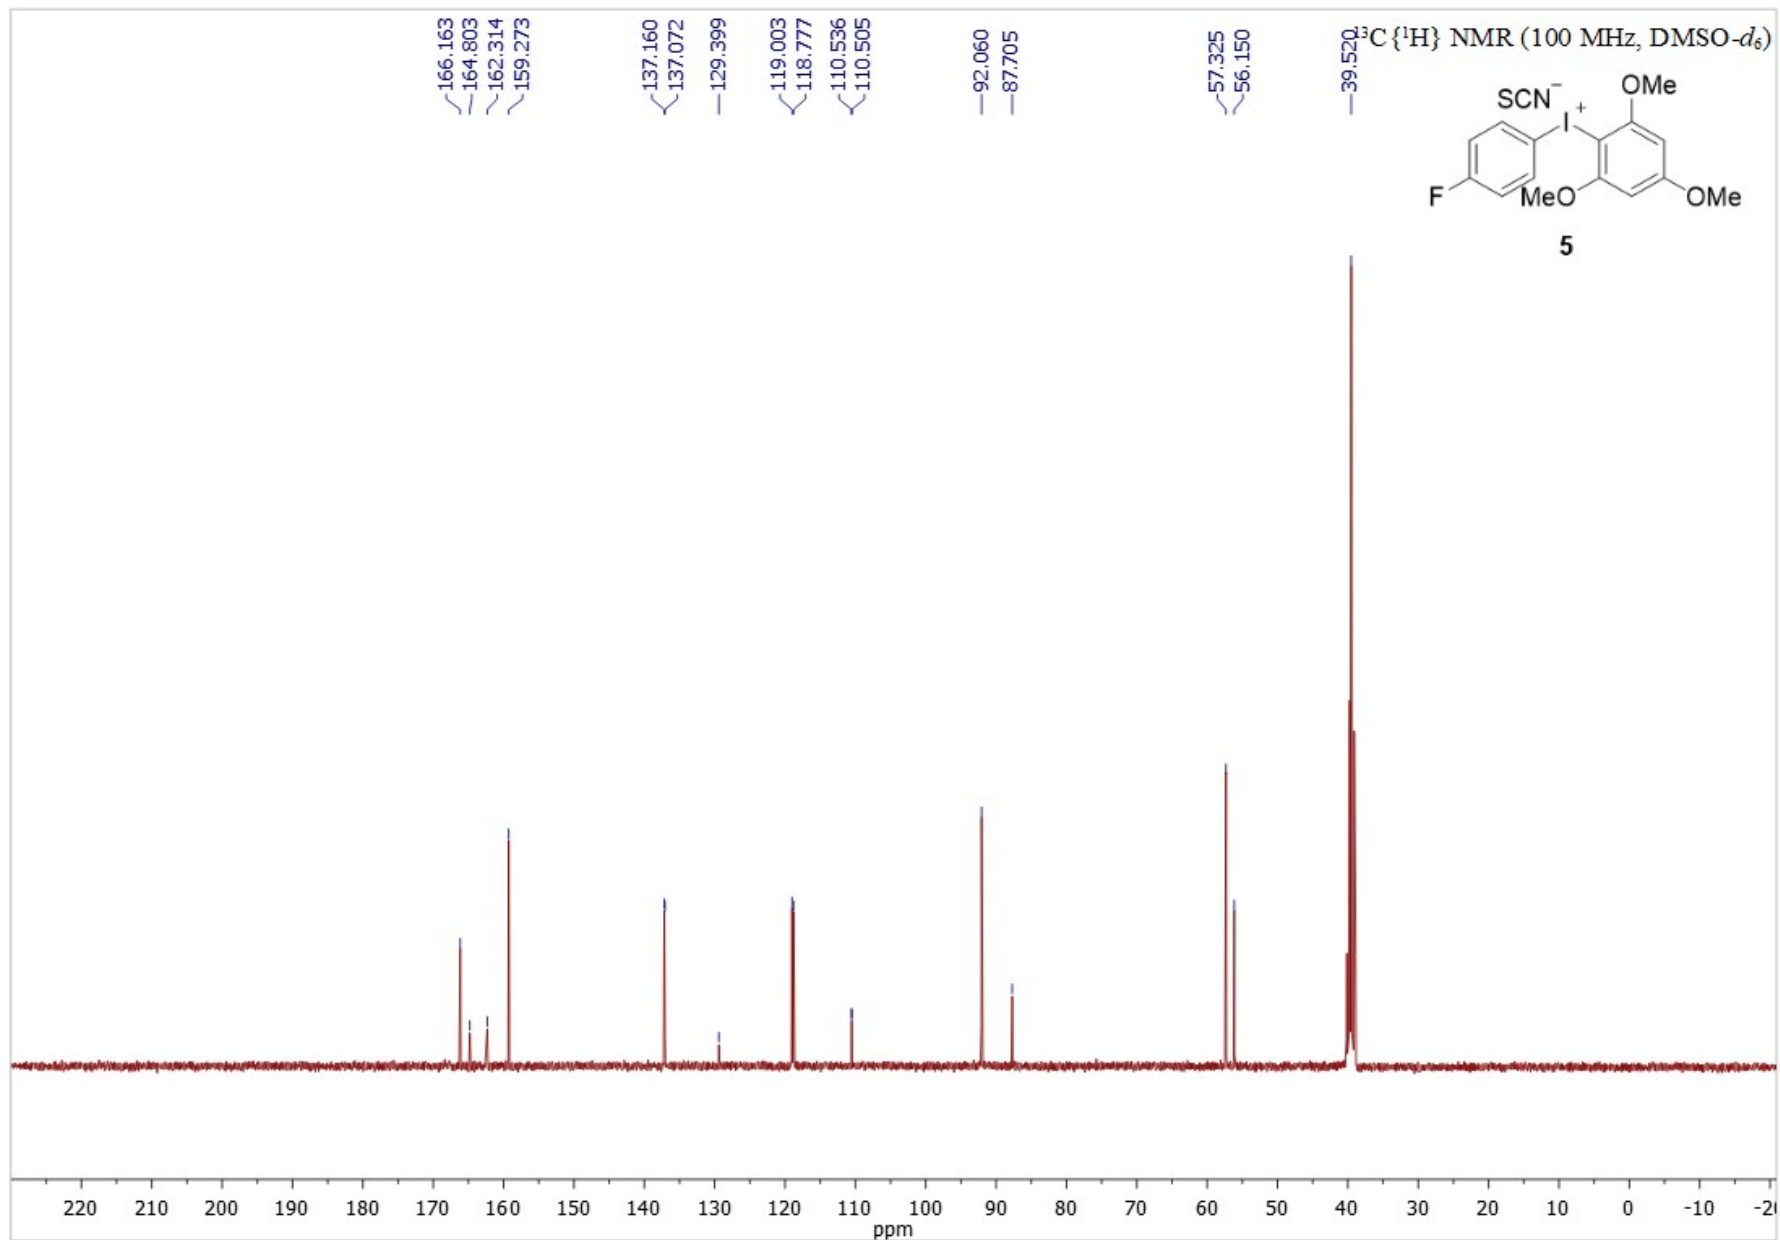

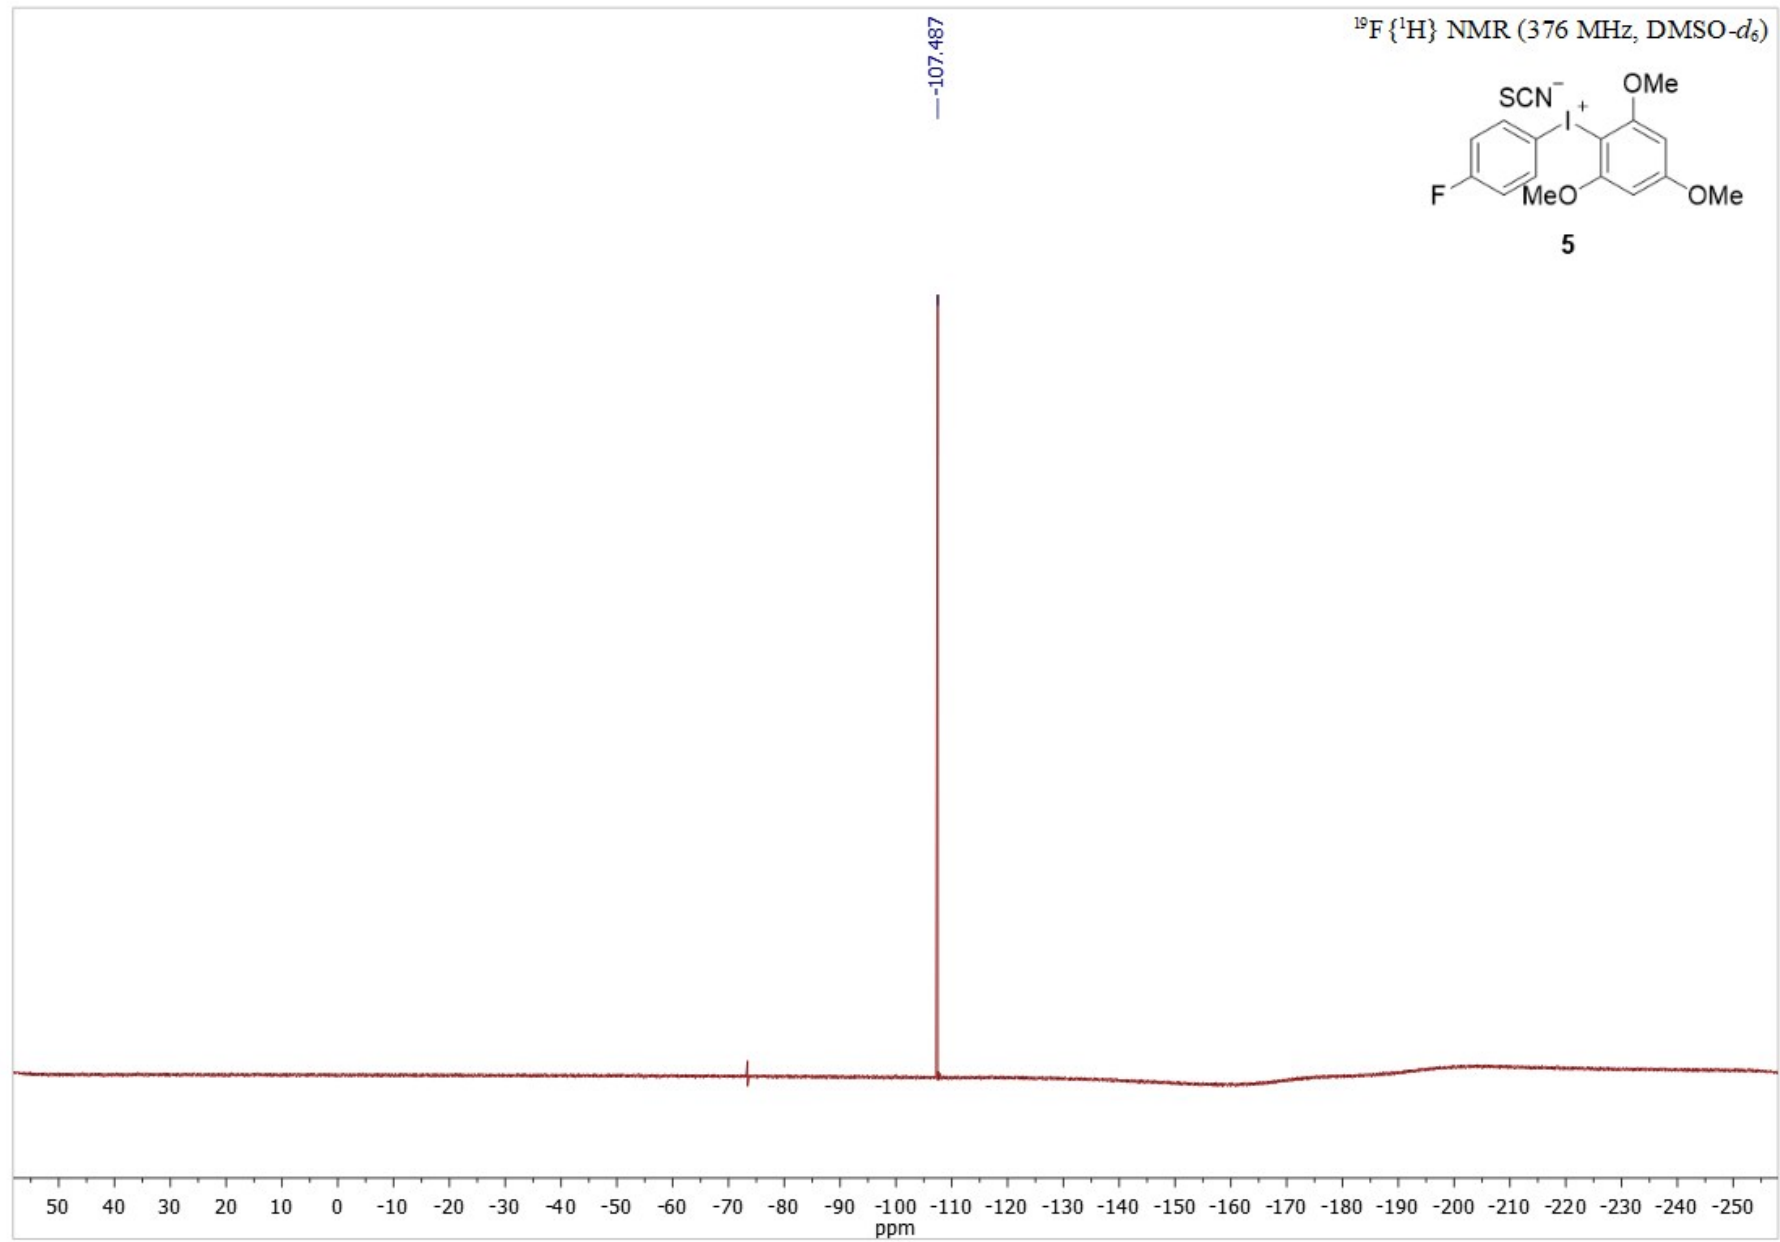

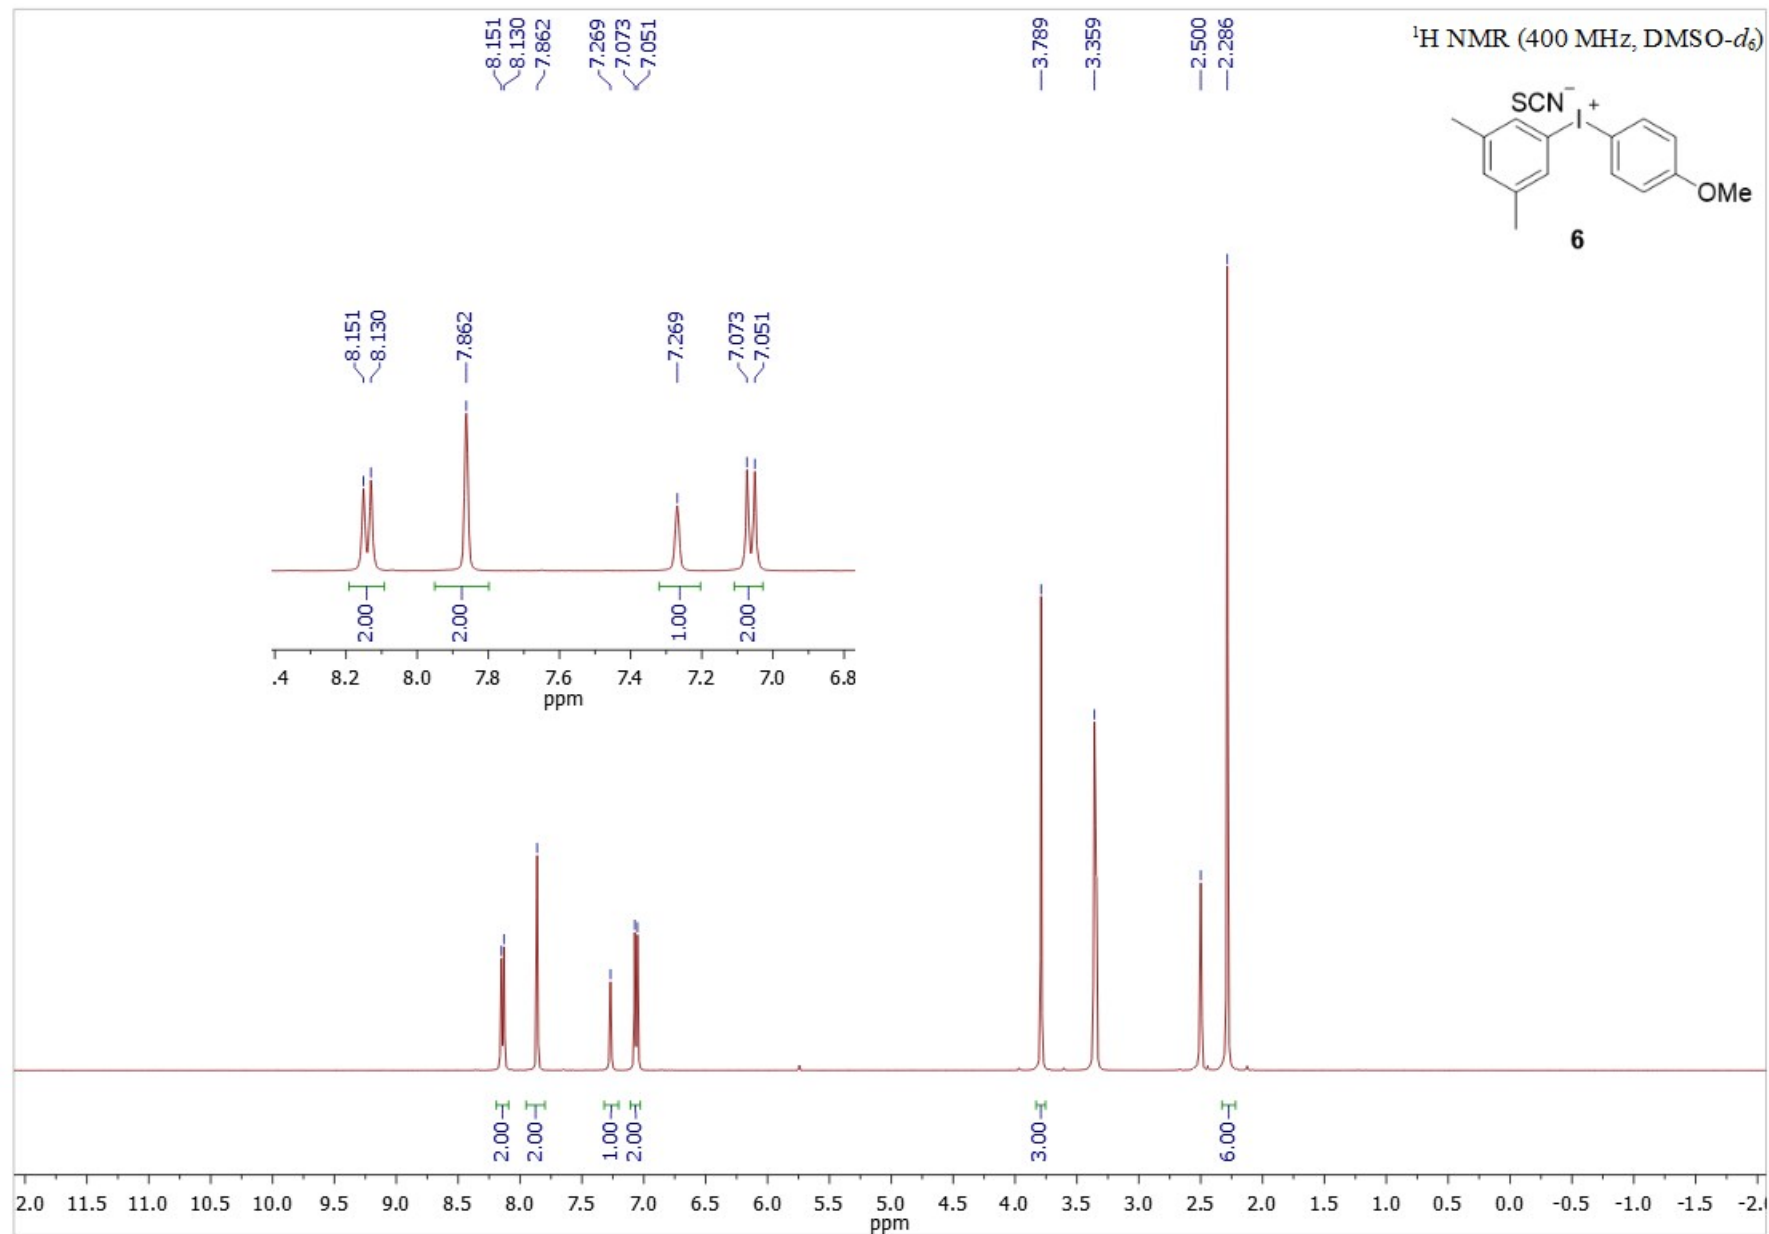



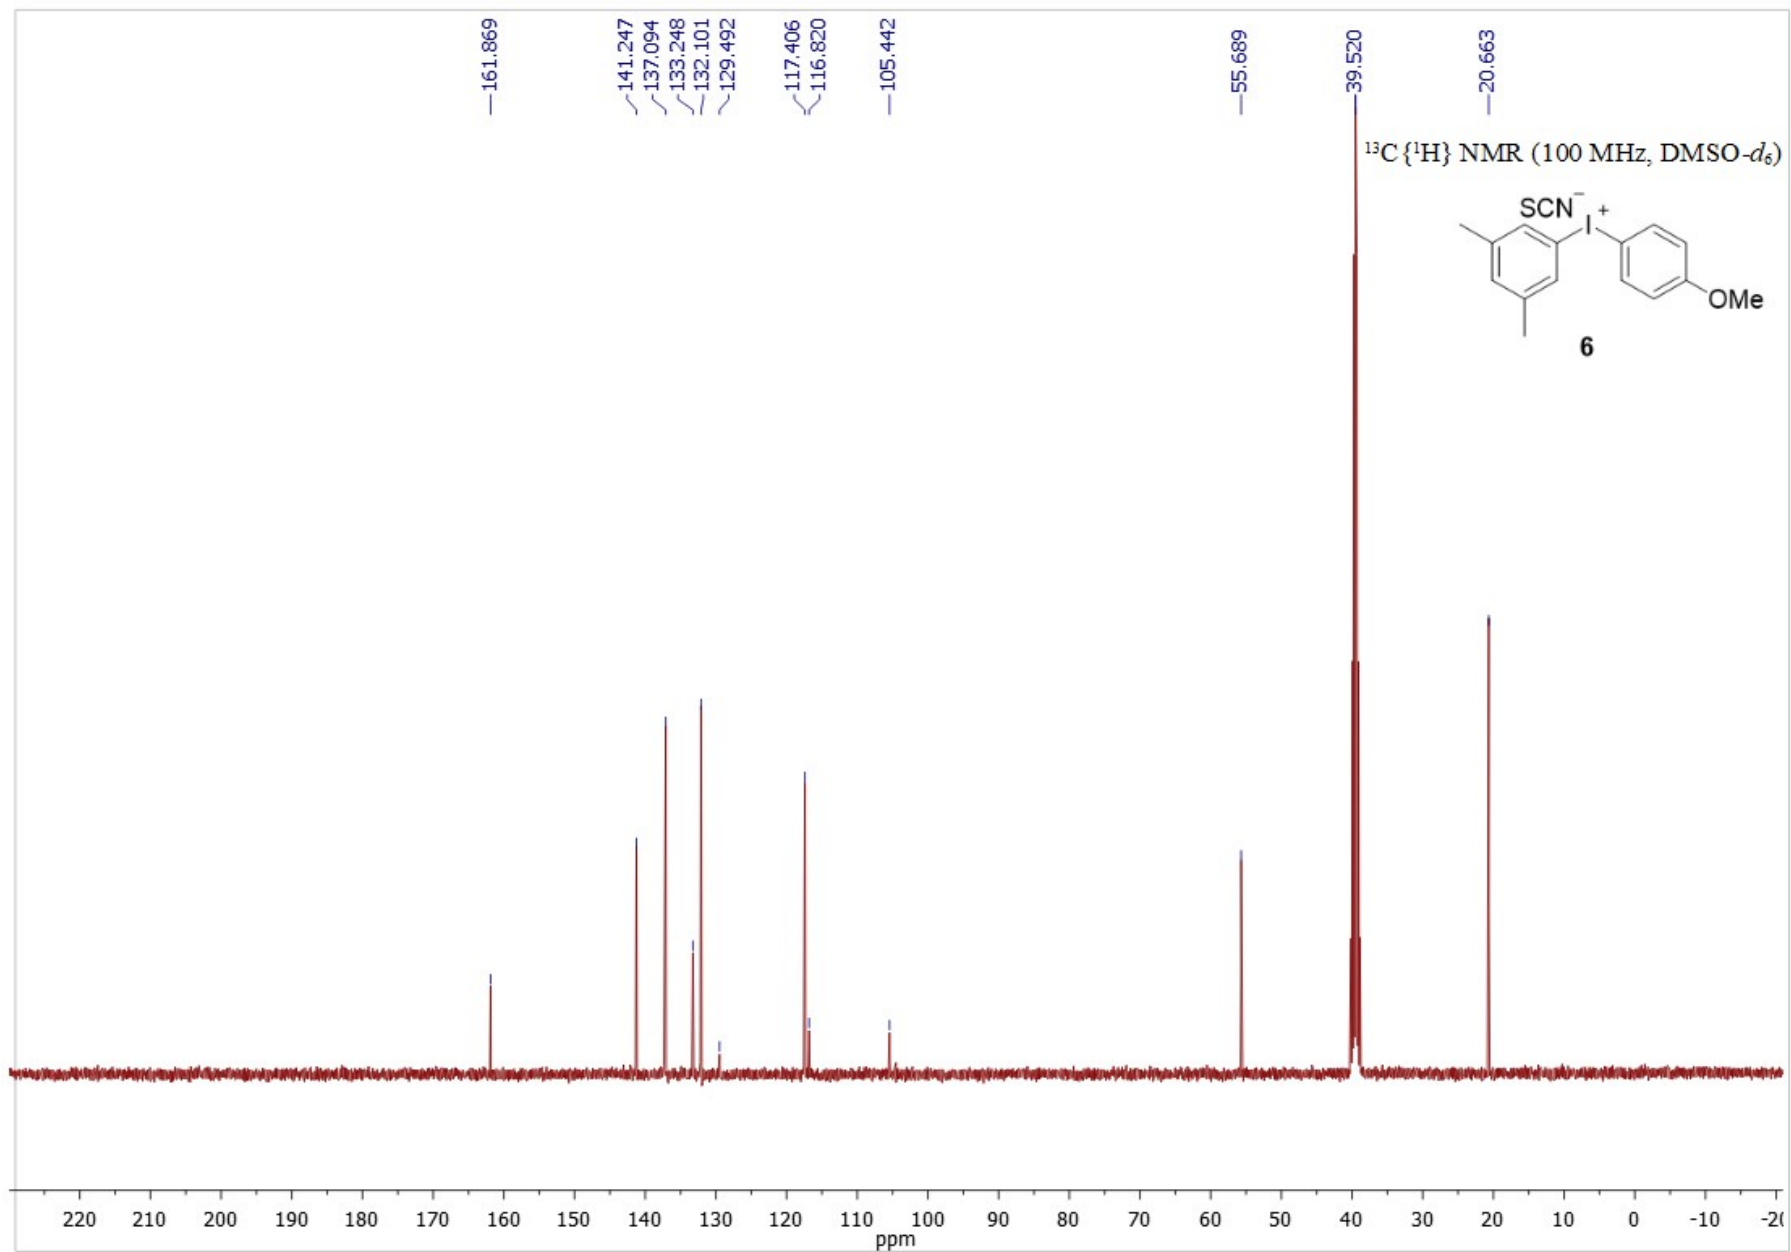

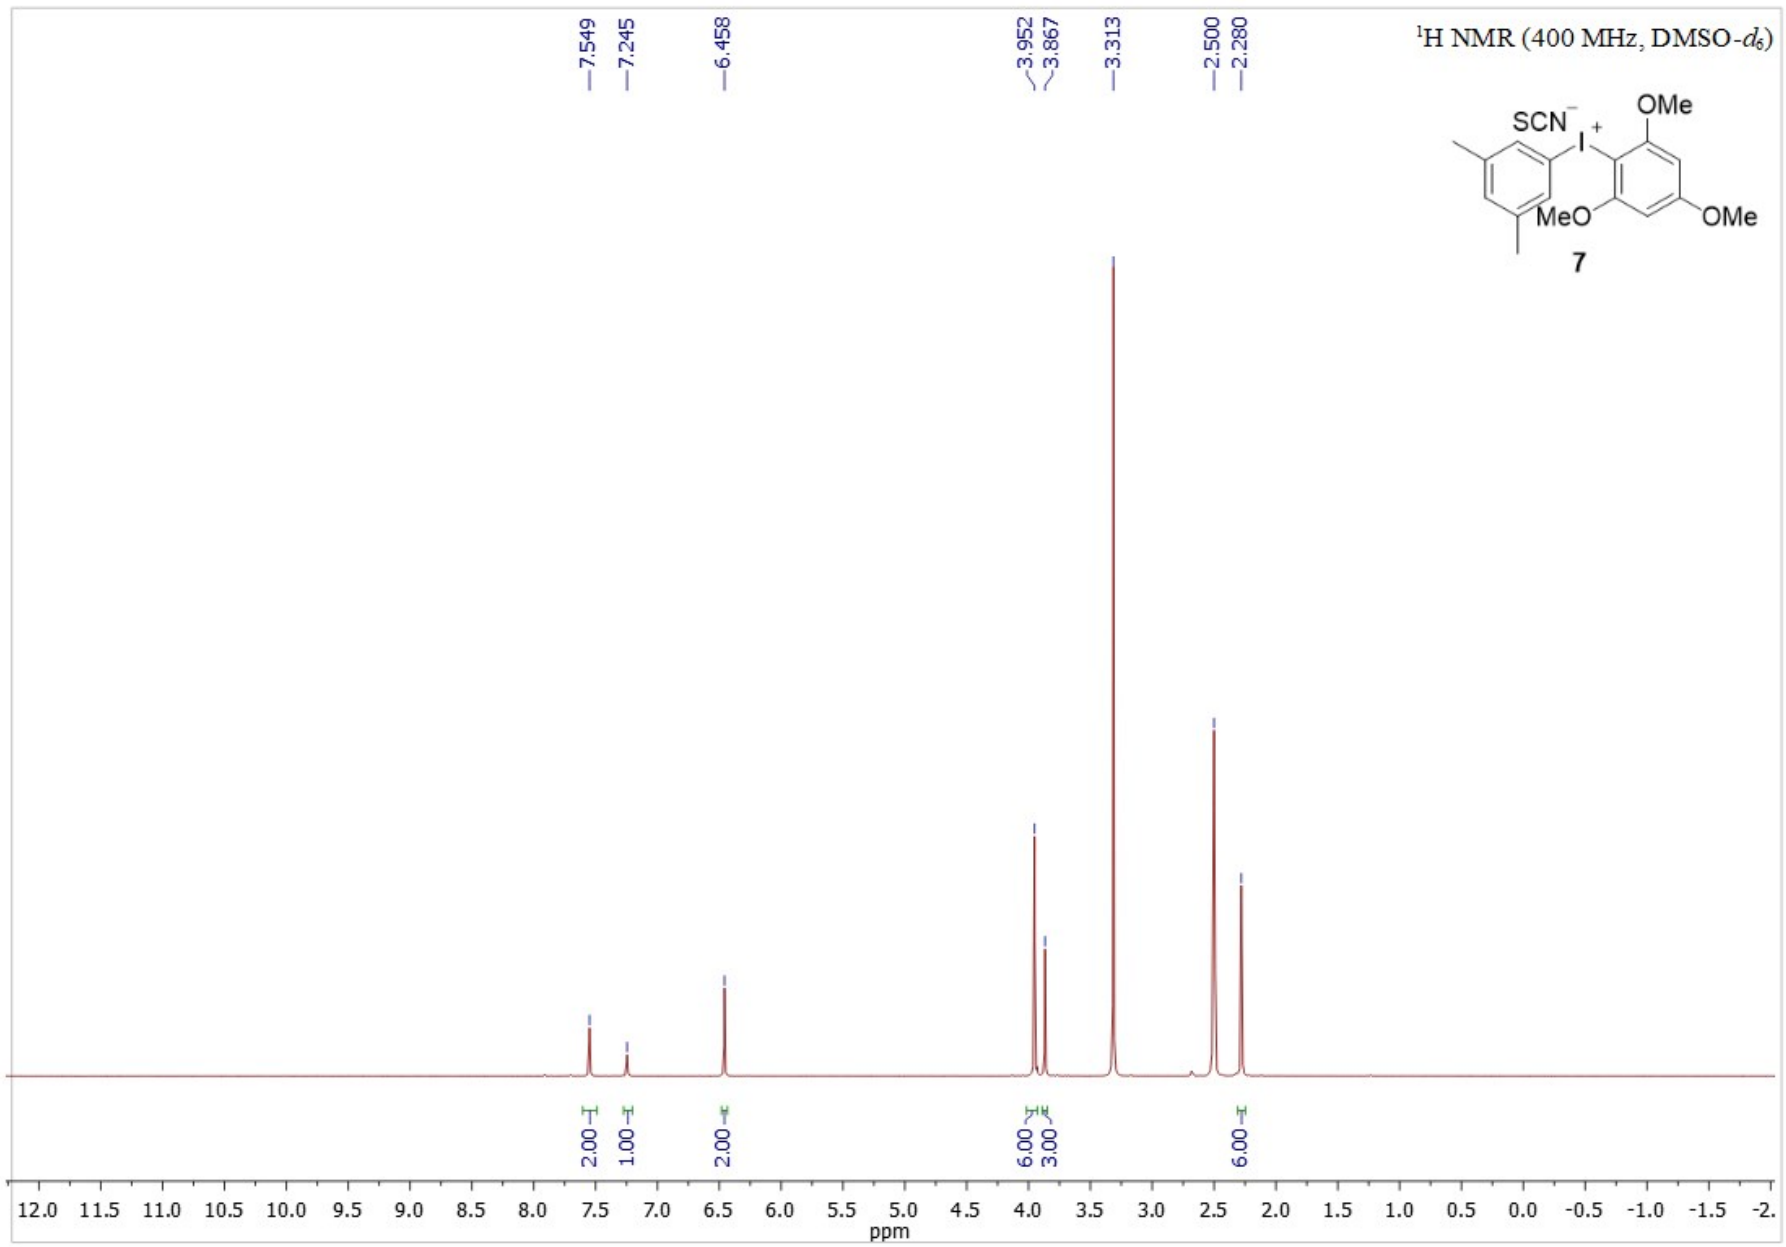

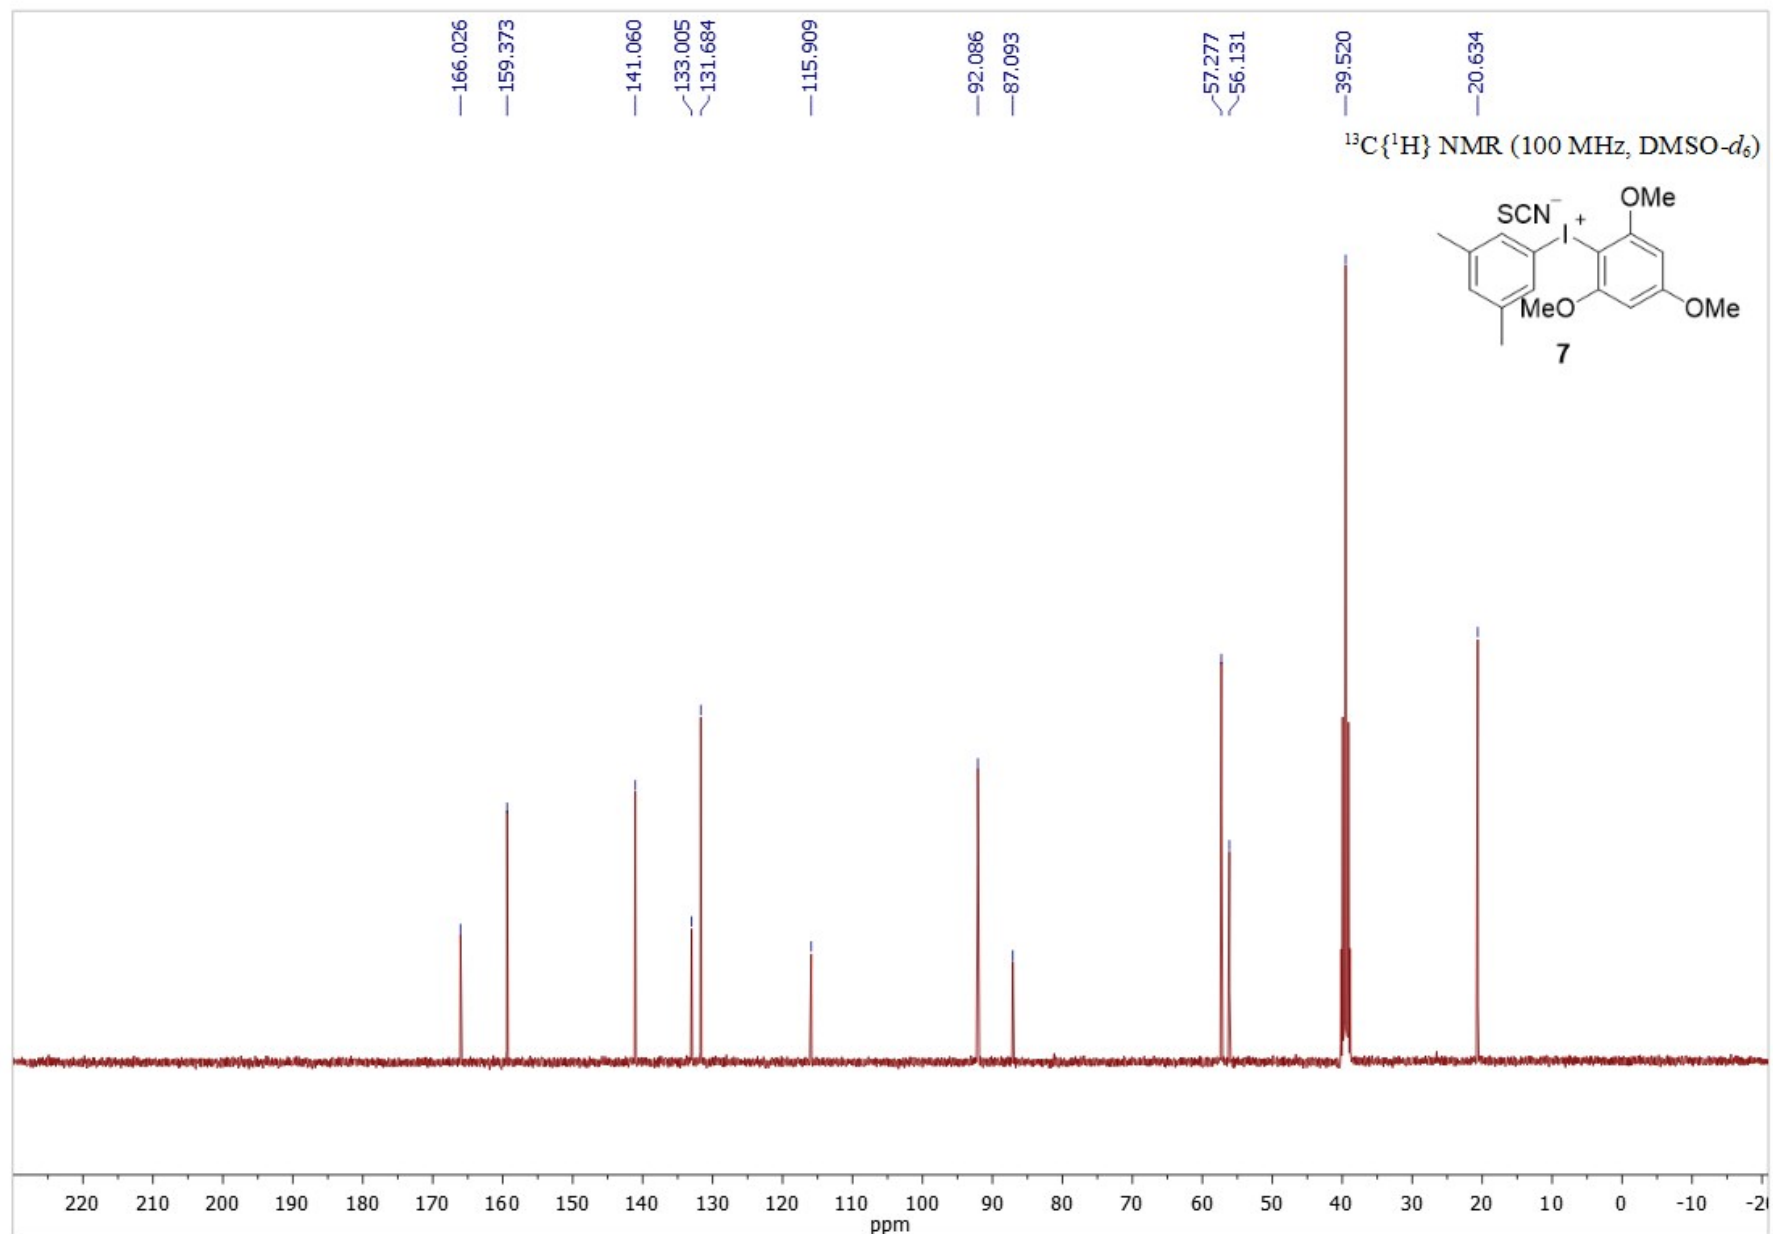

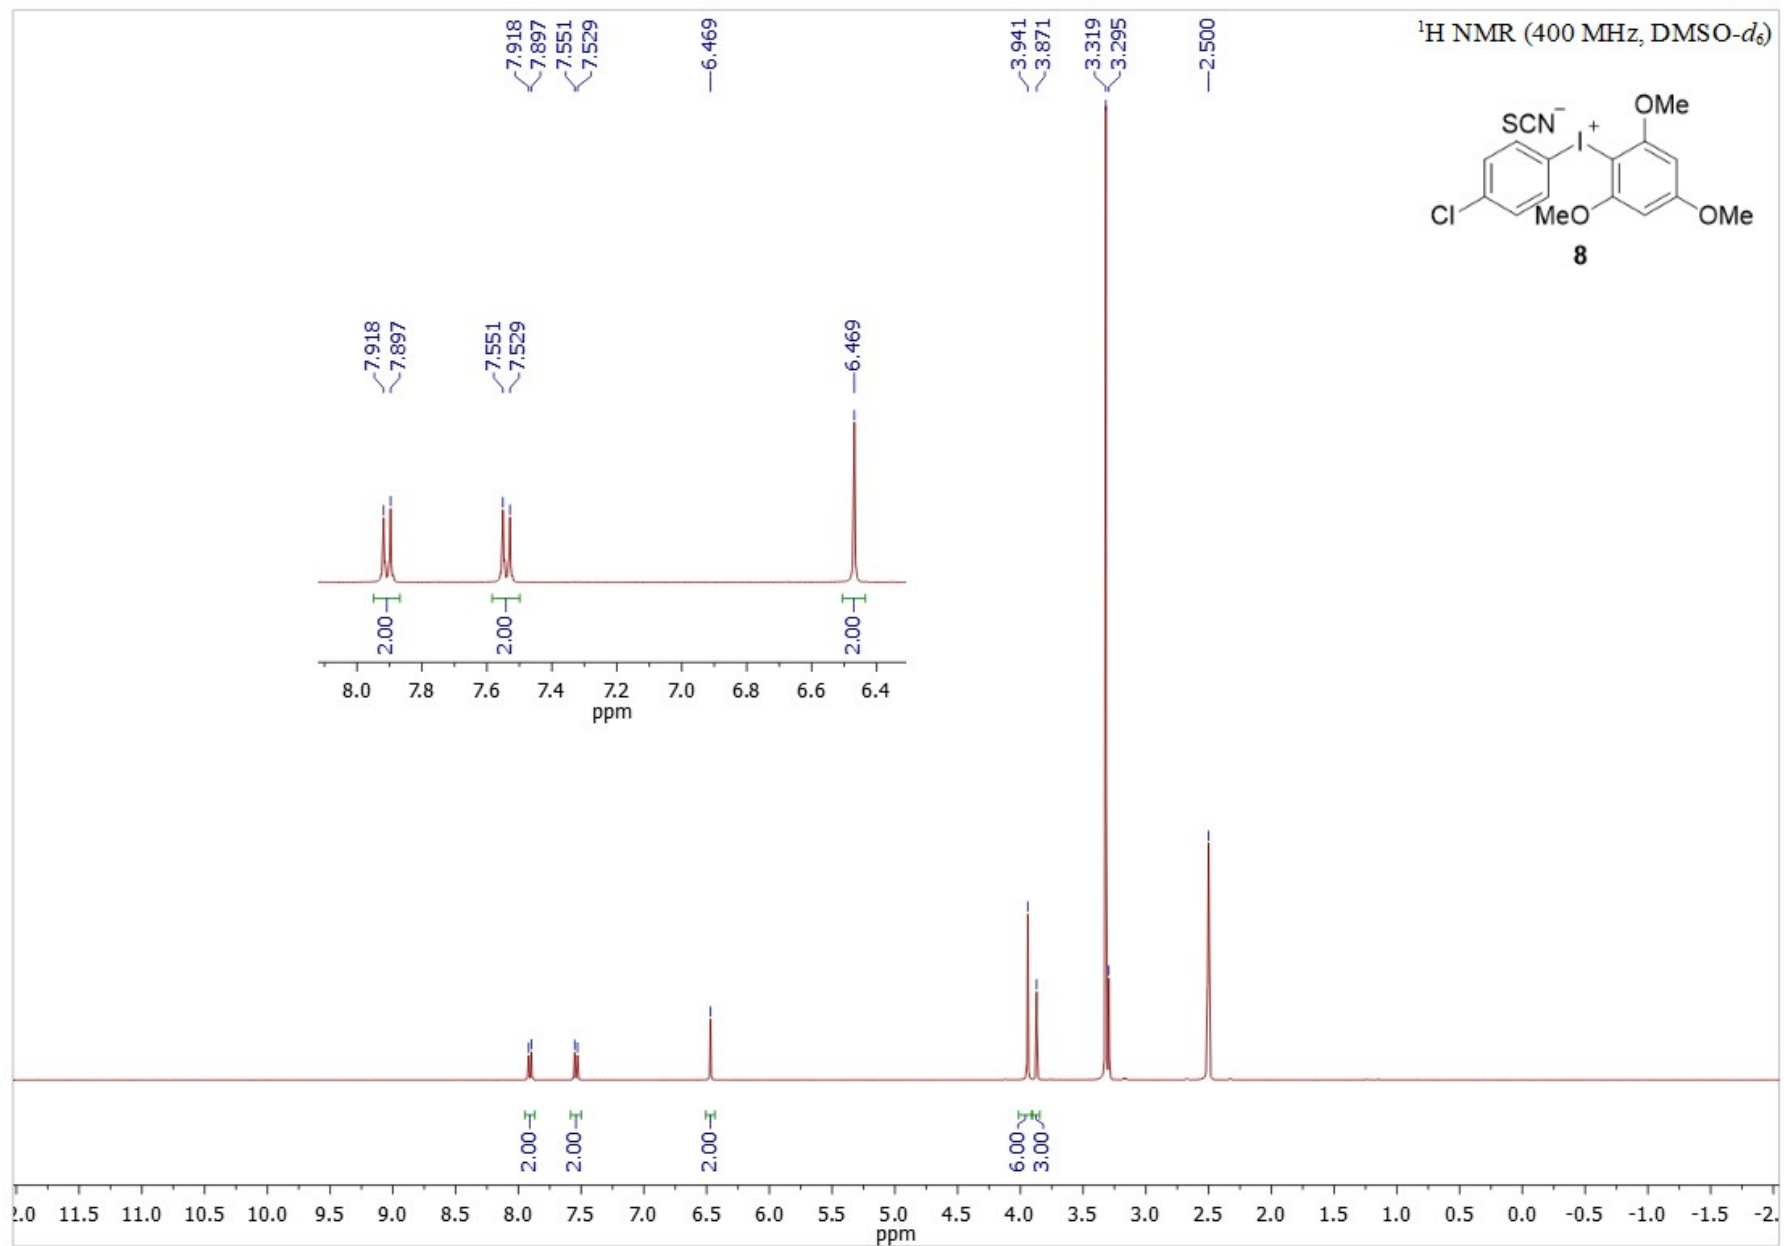

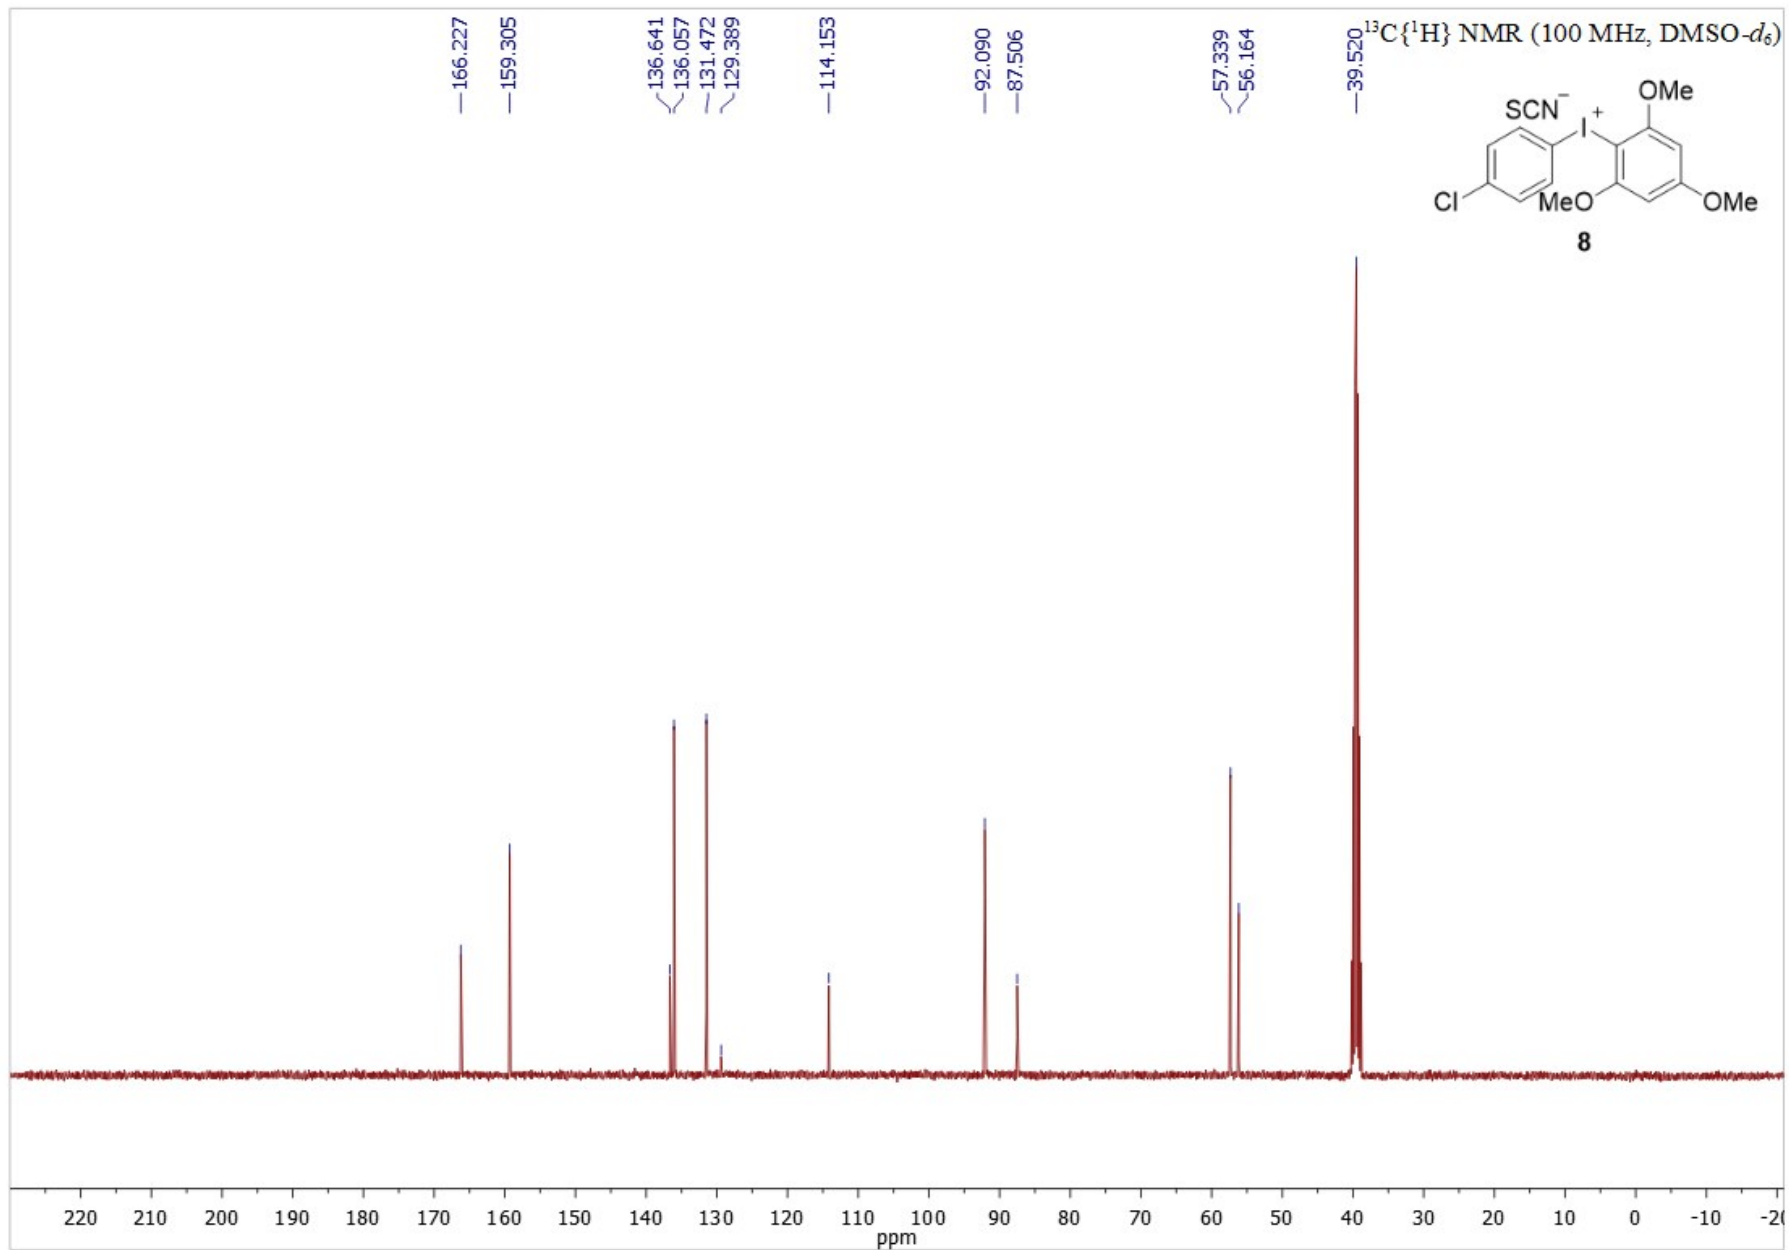

S37

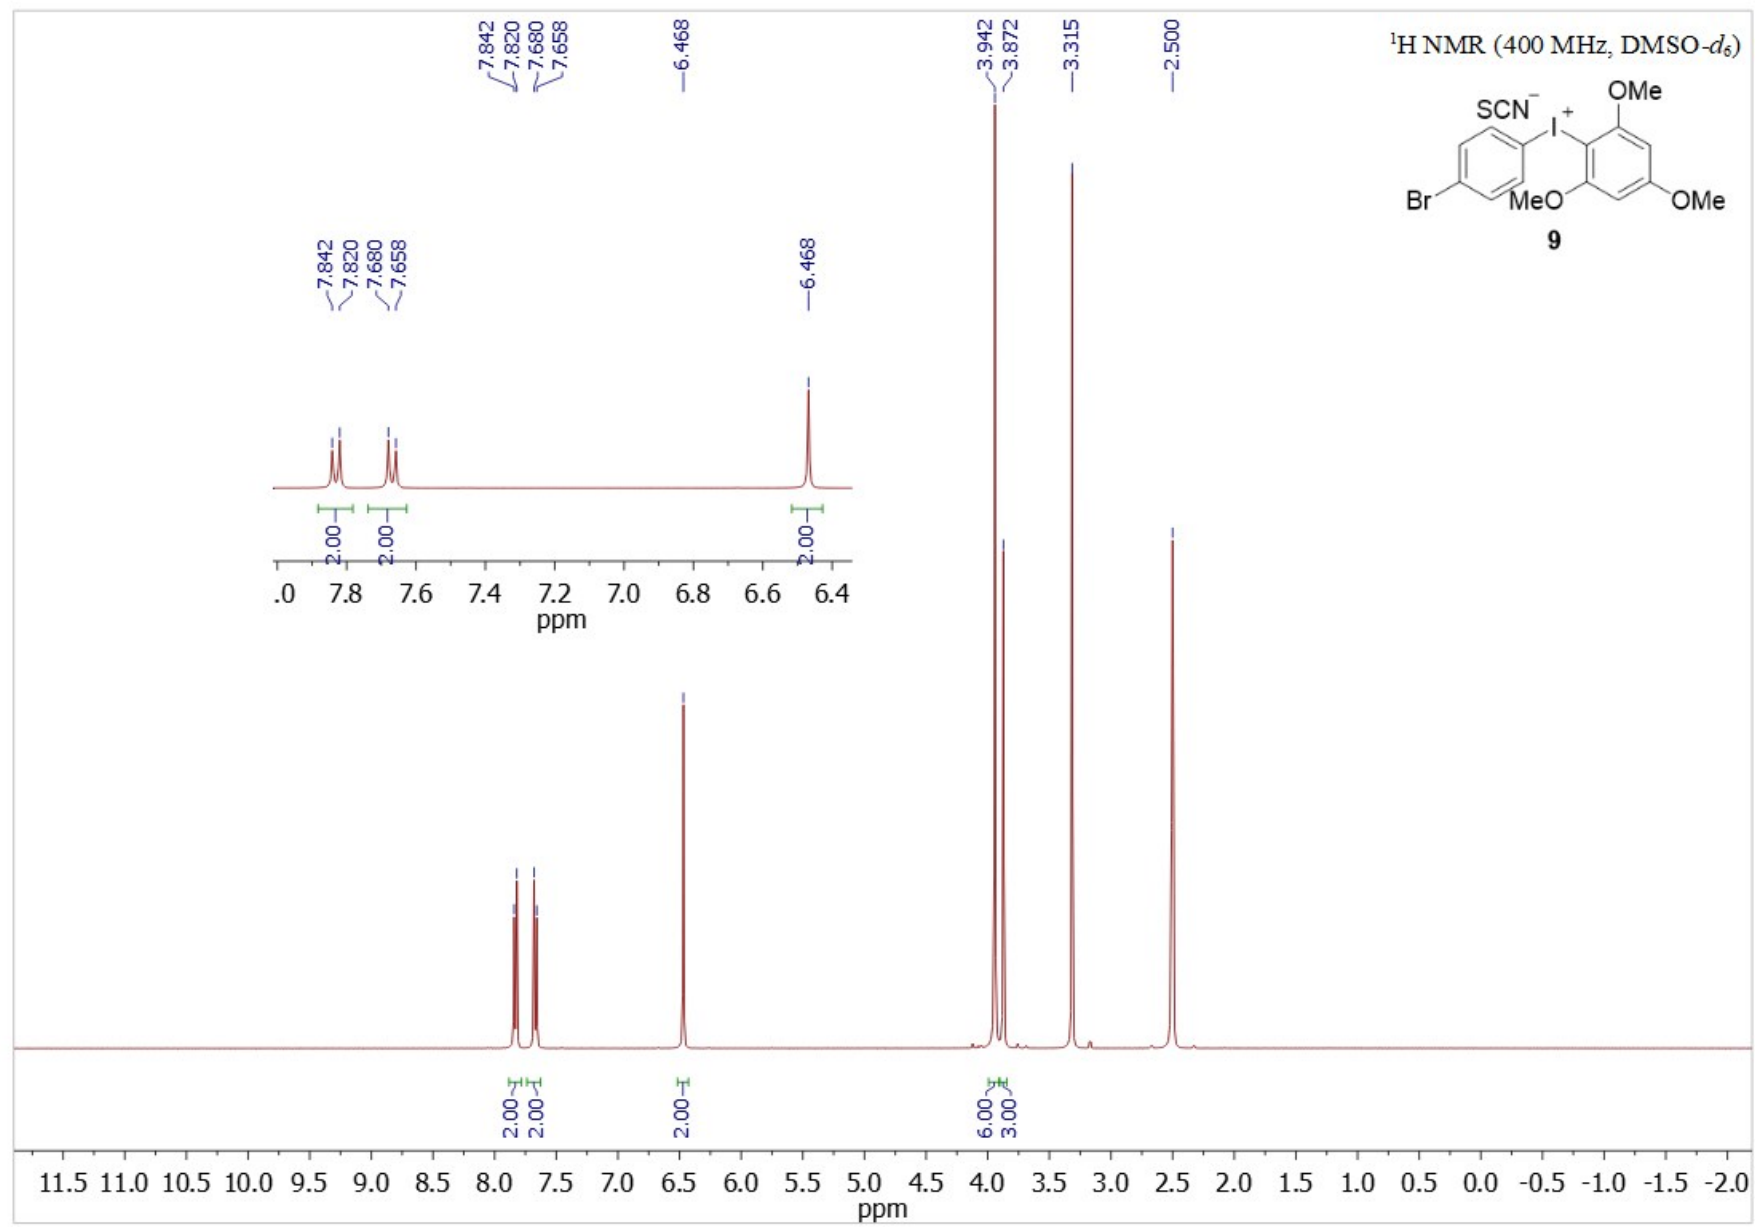

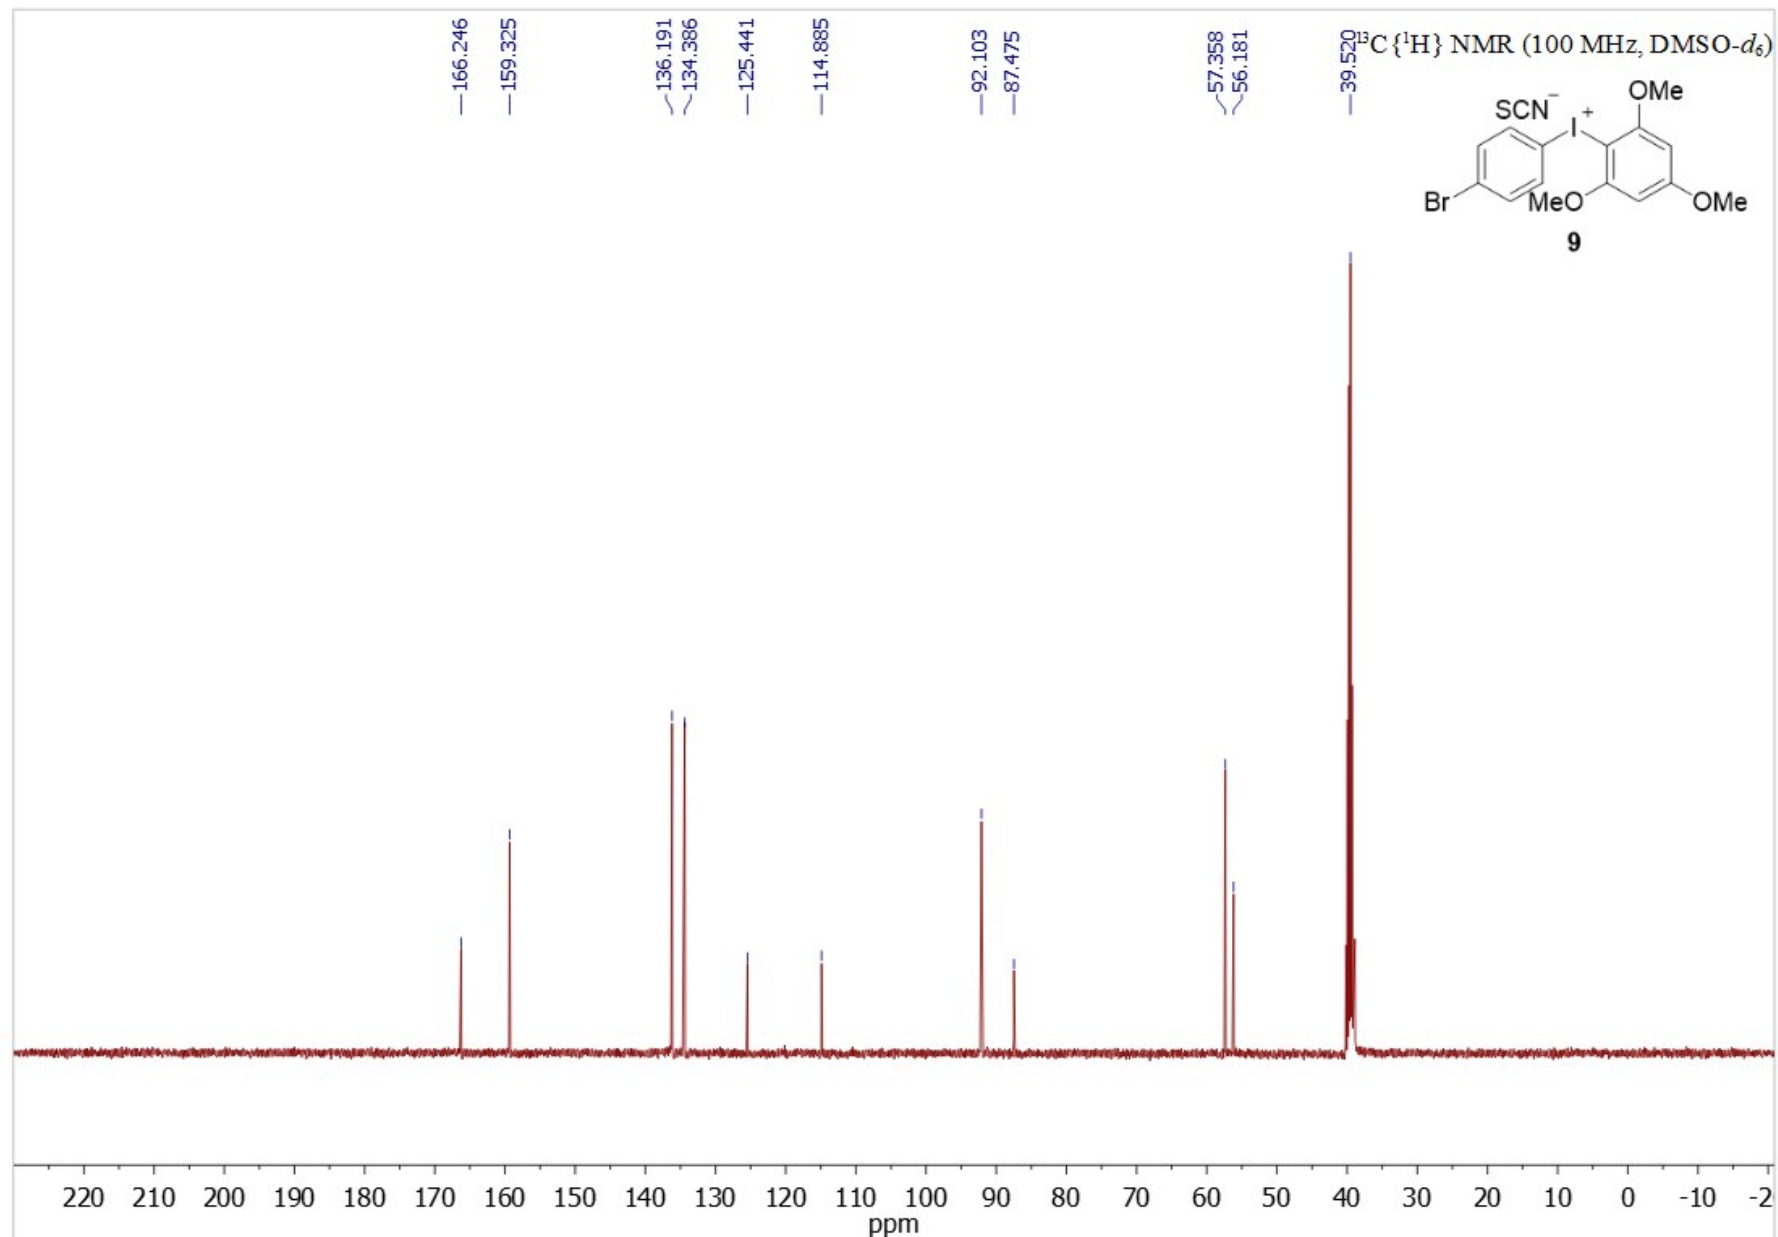

## Cartesian coordinates of the compounds used in the DFT study

### Compound 3 (SCN N-coordinated)

|   |             |             |             |
|---|-------------|-------------|-------------|
| I | 0.12995092  | -0.84995597 | -0.21454707 |
| C | 2.22908085  | -0.68981645 | -0.07535772 |
| C | 2.85560719  | -1.49037896 | 0.86840940  |
| H | 2.36402293  | -2.07146571 | 1.40286438  |
| C | 4.23231373  | -1.40161143 | 0.99548536  |
| H | 4.67816386  | -1.94115654 | 1.60850908  |
| C | -0.27467829 | 1.20512520  | 0.02099817  |
| C | -0.60937033 | 1.64949859  | 1.28514619  |
| H | -0.59666122 | 1.06994278  | 2.01245845  |
| C | 2.91966875  | 0.18401423  | -0.88738958 |
| H | 2.47778101  | 0.69281730  | -1.52705530 |
| C | 4.94388297  | -0.51138057 | 0.21421513  |
| H | 5.86555007  | -0.44265129 | 0.31571236  |
| C | 4.29338902  | 0.28078925  | -0.72086311 |
| H | 4.78065373  | 0.87967229  | -1.23847250 |
| C | -0.25769987 | 2.04625314  | -1.08400366 |
| H | -0.02851566 | 1.72335532  | -1.92521838 |
| C | -0.96284647 | 2.97287355  | 1.44169243  |
| H | -1.20796864 | 3.28897154  | 2.28180995  |
| C | -0.59192749 | 3.37695641  | -0.89909757 |
| H | -0.57250860 | 3.96359570  | -1.62110642 |
| C | -0.95544473 | 3.83983386  | 0.35710325  |
| H | -1.19477625 | 4.73021485  | 0.47335909  |
| S | -5.50208653 | -1.38841976 | -0.06014399 |
| N | -2.73450917 | -0.95283912 | 0.15153165  |
| C | -3.86834064 | -1.12233012 | 0.06528111  |

### Compound 3 (SCN S-coordinated)

|   |             |             |             |
|---|-------------|-------------|-------------|
| I | 0.18902575  | -0.70092656 | -0.03034262 |
| C | 0.50303855  | 1.38539783  | -0.02698270 |
| C | 1.34943092  | 1.88832041  | 0.95016663  |
| H | 1.75902858  | 1.32213586  | 1.56386349  |
| C | 1.56835465  | 3.25575484  | 0.98946465  |
| H | 2.14598684  | 3.61586476  | 1.62377629  |
| C | -1.91607206 | -0.61784982 | 0.03466854  |
| C | -2.52264721 | -0.74684150 | 1.26876109  |
| H | -2.01422702 | -0.80778923 | 2.04517841  |
| C | -0.12338947 | 2.18890088  | -0.95534589 |
| H | -0.66820272 | 1.82373939  | -1.61348964 |
| C | 0.92840917  | 4.08566878  | 0.08894393  |
| H | 1.06466300  | 5.00446493  | 0.13070707  |
| C | 0.08399755  | 3.55825146  | -0.87741353 |
| H | -0.34517339 | 4.12550108  | -1.47578418 |
| C | -2.64199010 | -0.49877017 | -1.14332829 |
| H | -2.21048397 | -0.41271257 | -1.96236868 |
| C | -3.89986960 | -0.78326319 | 1.32077414  |
| H | -4.32833848 | -0.88640957 | 2.14027123  |
| C | -4.02413598 | -0.51267215 | -1.06491236 |
| H | -4.53249313 | -0.41851565 | -1.83855769 |
| C | -4.65464022 | -0.66616141 | 0.16119786  |
| H | -5.58244987 | -0.69129243 | 0.20714302  |
| S | 3.40631982  | -0.73057969 | -0.12312644 |
| N | 3.21231222  | -3.53339370 | -0.13450290 |
| C | 3.30051758  | -2.38721059 | -0.12950028 |

### Compound 4 (SCN N-coordinated)

|   |             |             |             |
|---|-------------|-------------|-------------|
| I | 0.78543024  | -0.41572762 | -0.78435751 |
| O | -5.26454186 | -0.64514369 | 0.44951404  |
| O | -0.84765200 | -2.25114848 | 1.01881763  |
| O | -1.51240448 | 1.46165766  | -1.73847142 |
| C | 1.17956782  | 0.99938166  | 0.73588459  |
| C | -1.25227912 | -0.44589026 | -0.40254503 |
| C | 1.00326414  | 0.60906482  | 2.05557876  |
| H | 0.72664094  | -0.25457452 | 2.26106706  |
| C | -3.47029230 | 0.45383850  | -0.72930507 |
| H | -4.04821771 | 1.06337892  | -1.12971025 |
| C | -2.10257096 | 0.50363270  | -0.97805238 |
| C | -1.76211620 | -1.41334322 | 0.47758806  |
| C | -3.11683618 | -1.45644157 | 0.74735870  |
| H | -3.46320691 | -2.09310820 | 1.33022578  |
| C | 1.24759588  | 1.53492855  | 3.06169311  |
| H | 1.12875820  | 1.29352610  | 3.95090331  |
| C | -3.95576796 | -0.52671321 | 0.13100318  |
| C | -6.19221933 | 0.24593987  | -0.18963169 |
| H | -5.99182351 | 1.15014598  | 0.06082405  |
| H | -7.08606490 | 0.02704418  | 0.08509207  |



|   |             |             |             |
|---|-------------|-------------|-------------|
| H | -6.11941423 | 0.15298844  | -1.14248550 |
| C | 1.59487492  | 2.27428548  | 0.39804165  |
| H | 1.71400285  | 2.51520299  | -0.49256161 |
| C | 1.82815836  | 3.18649057  | 1.41744833  |
| H | 2.09570535  | 4.05238052  | 1.20945059  |
| C | -1.29088200 | -3.17725904 | 2.02141874  |
| H | -0.53683575 | -3.65813486 | 2.36884235  |
| H | -1.91394480 | -3.79625732 | 1.63234765  |
| H | -1.72014521 | -2.69676516 | 2.73271808  |
| C | 1.66612955  | 2.81579609  | 2.74478586  |
| H | 1.83950177  | 3.42794478  | 3.42245358  |
| C | -2.36478124 | 2.53112653  | -2.19299379 |
| H | -1.82946884 | 3.21703639  | -2.59836531 |
| H | -2.84296011 | 2.89783388  | -1.44520463 |
| H | -2.98971288 | 2.19009279  | -2.83667836 |
| S | 6.19288895  | -1.24628377 | -0.64205662 |
| N | 3.60586571  | -0.17236857 | -0.91299322 |
| C | 4.66796914  | -0.60666655 | -0.80043868 |

**Compound 4 (SCN S-coordinated)**

|   |             |             |             |
|---|-------------|-------------|-------------|
| I | -1.34776399 | 0.47177243  | -0.42590222 |
| O | 4.62414094  | -0.49213100 | 0.83285703  |
| O | 0.30000511  | 0.96953431  | 2.08890553  |
| O | 0.86913301  | -0.83964314 | -2.18104044 |
| C | -1.92177040 | -1.48298879 | 0.13840264  |
| C | 0.66240193  | 0.12427197  | -0.05519155 |
| C | -1.79481879 | -1.84346199 | 1.47218122  |
| H | -1.47288436 | -1.23606398 | 2.09831588  |
| C | 2.82988980  | -0.66829749 | -0.76912177 |
| H | 3.38733236  | -1.03289880 | -1.41887965 |
| C | 1.47824252  | -0.46413928 | -1.02677537 |
| C | 1.18533249  | 0.45327252  | 1.20529867  |
| C | 2.52238555  | 0.23372442  | 1.47730532  |
| H | 2.87712285  | 0.44740866  | 2.31010277  |
| C | -2.15753658 | -3.12947274 | 1.85139081  |
| H | -2.07340381 | -3.39079128 | 2.73893046  |
| C | 3.33055899  | -0.31581315 | 0.48083170  |
| C | 5.52460688  | -1.00468467 | -0.16191554 |
| H | 5.24999957  | -1.88765741 | -0.41769906 |
| H | 6.41410685  | -1.03671676 | 0.19879511  |
| H | 5.51241300  | -0.42931423 | -0.93046683 |
| C | -2.40198073 | -2.36129313 | -0.81552457 |
| H | -2.48629096 | -2.09881956 | -1.70400996 |
| C | -2.75352946 | -3.64343879 | -0.41772402 |
| H | -3.06643171 | -4.25225619 | -1.04704383 |
| C | 0.74685716  | 1.20609617  | 3.43192613  |
| H | 0.00833590  | 1.50342279  | 3.96738267  |
| H | 1.43119097  | 1.88019573  | 3.42751491  |
| H | 1.10178984  | 0.39317621  | 3.79835747  |
| C | -2.64255006 | -4.02334621 | 0.91225589  |
| H | -2.89485634 | -4.87898789 | 1.17347678  |
| C | 1.67212187  | -1.59277890 | -3.11103818 |
| H | 1.11579151  | -1.92329919 | -3.81998856 |
| H | 2.08135728  | -2.33159546 | -2.65387911 |
| H | 2.35408600  | -1.02520042 | -3.47703402 |
| S | -0.19256144 | 3.43697218  | -0.79993030 |
| N | -2.71275299 | 4.43893917  | -0.04887345 |
| C | -1.67756885 | 4.03389144  | -0.35494058 |

**Compound 5 (SCN N-coordinated)**

|   |             |             |             |
|---|-------------|-------------|-------------|
| I | 0.67615512  | -0.98759744 | 0.49404655  |
| O | -1.31814379 | 0.35322699  | 2.46759310  |
| F | 1.99844052  | 4.76727170  | -1.32718409 |
| O | -1.23374499 | -1.52059758 | -1.81845151 |
| O | -5.40056922 | 0.12707491  | 0.06767812  |
| C | 1.19234641  | 0.95385211  | -0.15669177 |
| C | -1.36195895 | -0.61014094 | 0.33013375  |
| C | -2.05872621 | 0.00612712  | 1.37790588  |
| C | 0.82416116  | 1.35623167  | -1.43356956 |
| H | 0.39215181  | 0.76668402  | -2.00823886 |
| C | -3.41759654 | 0.24586090  | 1.25502376  |
| H | -3.89132653 | 0.65509444  | 1.94378556  |
| C | -2.01386718 | -0.97118397 | -0.85300634 |
| C | 1.86424498  | 1.79967708  | 0.71412459  |
| H | 2.11768732  | 1.50074087  | 1.55795233  |
| C | 1.11173642  | 2.65176576  | -1.83933794 |
| H | 0.87719494  | 2.94785702  | -2.68892104 |
| C | -3.37807735 | -0.73248129 | -0.98385043 |
| H | -3.82632301 | -0.96454074 | -1.76441923 |
| C | -2.01415114 | 1.03124454  | 3.53084791  |
| H | -2.74949168 | 0.48989464  | 3.82671715  |

|   |             |             |             |
|---|-------------|-------------|-------------|
| H | -2.34515703 | 1.87335810  | 3.20966694  |
| H | -1.41234271 | 1.18145909  | 4.26244516  |
| C | -1.85708134 | -1.91487936 | -3.05332335 |
| H | -2.52520763 | -2.58053380 | -2.87631955 |
| H | -1.19472113 | -2.27731967 | -3.64434211 |
| H | -2.26718220 | -1.14987087 | -3.46326539 |
| C | -4.06199002 | -0.13708063 | 0.07966341  |
| C | 1.75159926  | 3.48465534  | -0.95640106 |
| C | 2.15484875  | 3.09182097  | 0.31303644  |
| H | 2.60623923  | 3.67833764  | 0.87585984  |
| C | -6.13024299 | -0.19274036 | -1.11770442 |
| H | -6.10298782 | -1.14079282 | -1.26393886 |
| H | -5.73570061 | 0.25867400  | -1.86691640 |
| H | -7.04163560 | 0.09024785  | -1.01843516 |
| S | 5.99480944  | -1.99456747 | -0.23942754 |
| N | 3.46862226  | -1.05848894 | 0.58549992  |
| C | 4.51125024  | -1.43726283 | 0.23920625  |

**Compound 5 (SCN S-coordinated)**

|   |             |             |             |
|---|-------------|-------------|-------------|
| I | -0.54783434 | 1.36835772  | 0.14725557  |
| O | 0.27552189  | -0.52533300 | 2.47232421  |
| F | -5.32926983 | -2.46528656 | -0.64324093 |
| O | 1.10854249  | 0.12315590  | -2.08553262 |
| O | 3.40875614  | -3.39080877 | 0.36310027  |
| C | -2.21742814 | 0.11247006  | -0.15989729 |
| C | 0.77551888  | -0.23452106 | 0.19984507  |
| C | 0.99368286  | -0.93926066 | 1.39099743  |
| C | -2.27313344 | -0.66471717 | -1.30914204 |
| H | -1.60536075 | -0.60377864 | -1.95319906 |
| C | 1.88263386  | -2.00156333 | 1.41049142  |
| H | 2.03555802  | -2.47785469 | 2.19537725  |
| C | 1.42780645  | -0.59964789 | -0.98183178 |
| C | -3.21258846 | 0.06675461  | 0.80589499  |
| H | -3.16270909 | 0.61157312  | 1.55844131  |
| C | -3.34145283 | -1.53332623 | -1.48225501 |
| H | -3.40450579 | -2.06515230 | -2.24229220 |
| C | 2.32099804  | -1.66606074 | -0.96995973 |
| H | 2.76147095  | -1.92303526 | -1.74714125 |
| C | 0.45508824  | -1.27305281 | 3.69023876  |
| H | 1.38473279  | -1.27496342 | 3.92915586  |
| H | 0.15656253  | -2.17590872 | 3.55753243  |
| H | -0.05542542 | -0.86681034 | 4.39331430  |
| C | 1.75633589  | -0.20874779 | -3.32614474 |
| H | 2.70475598  | -0.09731844 | -3.23179562 |
| H | 1.43477800  | 0.37014361  | -4.01959444 |
| H | 1.56167383  | -1.12049353 | -3.55483570 |
| C | 2.54348948  | -2.34401134 | 0.23178097  |
| C | -4.30289768 | -1.58727209 | -0.50479880 |
| C | -4.28078834 | -0.79650544 | 0.63651617  |
| H | -4.96239513 | -0.84516320 | 1.26704765  |
| C | 4.09484245  | -3.83648965 | -0.80757969 |
| H | 4.66351974  | -3.13465836 | -1.13157011 |
| H | 3.45476427  | -4.06837515 | -1.48380914 |
| H | 4.62594394  | -4.60633698 | -0.59347813 |
| S | 2.14374010  | 2.99046147  | 0.49260410  |
| N | 0.73078203  | 5.13403731  | -0.66800015 |
| C | 1.31912687  | 4.25611722  | -0.18471063 |

**Compound 6 (SCN N-coordinated)**

|   |             |             |             |
|---|-------------|-------------|-------------|
| I | 0.42676010  | -1.42341509 | -0.03851391 |
| O | -5.61491172 | -0.17858698 | 0.42759110  |
| C | -1.65771473 | -1.21203447 | -0.00504374 |
| C | 0.71926786  | 0.66964561  | 0.04150943  |
| C | -3.66368920 | -0.39967583 | -1.01754280 |
| H | -4.12114428 | -0.07240910 | -1.75763406 |
| C | -4.32538843 | -0.55889073 | 0.19923337  |
| C | -3.66547220 | -1.10767394 | 1.29215555  |
| H | -4.12538353 | -1.25736514 | 2.08652218  |
| C | -2.32276581 | -0.72937699 | -1.11686647 |
| H | -1.87316896 | -0.62723270 | -1.92463289 |
| C | -2.32284521 | -1.42998419 | 1.19641129  |
| H | -1.87154824 | -1.78862438 | 1.92736120  |
| C | 0.95712073  | 1.24736877  | 1.27159390  |
| H | 1.00752167  | 0.72512777  | 2.04111922  |
| C | -6.26218889 | 0.57192147  | -0.60058998 |
| H | -5.73307081 | 1.34300177  | -0.81595355 |
| H | -7.12820731 | 0.85274803  | -0.29590039 |
| H | -6.36044108 | 0.02361428  | -1.38335586 |
| C | 0.61202837  | 1.39347226  | -1.13029248 |
| H | 0.45653873  | 0.96602802  | -1.94142550 |
| C | 0.74241873  | 2.78219911  | -1.06776561 |

|   |             |             |             |
|---|-------------|-------------|-------------|
| C | 1.12089008  | 2.63594391  | 1.33612576  |
| C | 1.00291860  | 3.37610641  | 0.16954154  |
| H | 1.10102937  | 4.30026918  | 0.21199909  |
| C | 1.42195239  | 3.29534680  | 2.65643707  |
| H | 1.23795206  | 2.68038528  | 3.37044648  |
| H | 0.87192146  | 4.07603982  | 2.75678376  |
| H | 2.34712145  | 3.54978366  | 2.68358635  |
| C | 0.58804918  | 3.61982776  | -2.31305444 |
| H | 0.53699565  | 3.04560842  | -3.08071543 |
| H | 1.34352470  | 4.20481203  | -2.40135340 |
| H | -0.21536479 | 4.14137708  | -2.25017698 |
| S | 6.08139162  | -1.19642539 | -0.37296640 |
| N | 3.30936652  | -1.16185742 | 0.07705601  |
| C | 4.44856872  | -1.15713931 | -0.10820100 |

**Compound 6 (SCN S-coordinated)**

|   |             |             |             |
|---|-------------|-------------|-------------|
| I | -0.82617667 | -1.13539780 | -0.05504455 |
| O | -0.09297163 | 4.97456204  | 0.57697608  |
| C | -0.79342598 | 0.95760942  | 0.04027340  |
| C | 1.28554384  | -1.24833713 | -0.02768016 |
| C | -0.17976696 | 3.05559515  | -0.92455453 |
| H | 0.08973760  | 3.56151167  | -1.65634652 |
| C | -0.36663167 | 3.66441794  | 0.31566960  |
| C | -0.83119515 | 2.92721589  | 1.39818761  |
| H | -1.00114894 | 3.34853988  | 2.20969610  |
| C | -0.39560822 | 1.69477967  | -1.05960024 |
| H | -0.27421001 | 1.28002175  | -1.88318735 |
| C | -1.03944517 | 1.56523518  | 1.26651167  |
| H | -1.34094026 | 1.06301507  | 1.99001371  |
| C | 1.91008138  | -1.47206626 | 1.18200739  |
| H | 1.41218770  | -1.59034711 | 1.96018260  |
| C | 0.57511461  | 5.71466232  | -0.44542276 |
| H | 1.38345030  | 5.26077621  | -0.69340062 |
| H | 0.78775411  | 6.59220245  | -0.11924027 |
| H | 0.00228023  | 5.78854795  | -1.21315866 |
| C | 1.96996535  | -1.04402762 | -1.21020706 |
| H | 1.51195070  | -0.90185980 | -2.00697131 |
| C | 3.36583708  | -1.05582423 | -1.18060176 |
| C | 3.30870839  | -1.51717524 | 1.21255859  |
| C | 4.00860363  | -1.30092394 | 0.03524871  |
| H | 4.93851235  | -1.32009144 | 0.05543680  |
| C | 4.02212475  | -1.79949250 | 2.50870931  |
| H | 3.41049953  | -1.69070015 | 3.24077627  |
| H | 4.75495587  | -1.18734822 | 2.61031146  |
| H | 4.35544945  | -2.69963184 | 2.50117259  |
| C | 4.15785769  | -0.79255905 | -2.43741947 |
| H | 3.56360969  | -0.76836352 | -3.19102520 |
| H | 4.80319109  | -1.49172208 | -2.56176750 |
| H | 4.60998667  | 0.05065084  | -2.35984532 |
| S | -4.01300379 | -0.75973594 | 0.03548627  |
| N | -3.82056765 | -3.50962128 | -0.50154140 |
| C | -3.91844611 | -2.38119136 | -0.28002779 |

**Compound 7 (SCN N-coordinated)**

|   |             |             |             |
|---|-------------|-------------|-------------|
| I | -0.53703768 | -0.98832651 | 0.61731895  |
| O | 1.65879600  | -0.10530233 | 2.62672571  |
| O | 5.48689586  | 0.22591393  | -0.14245208 |
| O | 1.15745441  | -0.89222122 | -1.96130802 |
| C | 1.46611248  | -0.48504093 | 0.32432732  |
| C | 3.62331821  | 0.07930686  | 1.22330964  |
| H | 4.16688666  | 0.30889899  | 1.94201134  |
| C | 2.01294777  | -0.56784434 | -0.96309436 |
| C | 3.36749145  | -0.33258114 | -1.16790270 |
| H | 3.73732878  | -0.38526227 | -2.01953933 |
| C | 2.28598757  | -0.16839655 | 1.42037379  |
| C | -1.34462390 | 0.93171993  | 0.09056162  |
| C | -2.22948757 | 1.50123059  | 0.97134442  |
| H | -2.45644958 | 1.07008118  | 1.76318689  |
| C | 4.15954886  | -0.01539668 | -0.06004159 |
| C | 2.47068468  | 0.23790723  | 3.75765683  |
| H | 3.16847611  | -0.41266549 | 3.86103017  |
| H | 1.92810259  | 0.25356916  | 4.54882161  |
| H | 2.86020885  | 1.10474791  | 3.61959866  |
| C | -1.53487251 | 2.74344158  | -1.44219332 |
| C | -2.78177328 | 2.74585898  | 0.65305071  |
| C | -2.41854312 | 3.34403817  | -0.55355417 |
| H | -2.77985654 | 4.17405853  | -0.77025749 |
| C | 1.66694065  | -0.94088059 | -3.30899682 |
| H | 2.37048335  | -1.59231085 | -3.36237142 |
| H | 2.01069833  | -0.07831007 | -3.55215687 |
| H | 0.95934083  | -1.18443465 | -3.90991320 |

|   |             |             |             |
|---|-------------|-------------|-------------|
| C | -0.98476740 | 1.50599369  | -1.11132002 |
| H | -0.39028303 | 1.07968452  | -1.68563250 |
| C | 6.12158692  | 0.12280816  | -1.42230287 |
| H | 5.94593066  | -0.74426199 | -1.79728893 |
| H | 7.06849119  | 0.24168821  | -1.32089447 |
| H | 5.77449173  | 0.79970463  | -2.00716599 |
| C | -1.20857284 | 3.39525869  | -2.76240124 |
| H | -1.90740482 | 3.20805420  | -3.39264921 |
| H | -0.37751282 | 3.04887203  | -3.09301441 |
| H | -1.13439245 | 4.34486957  | -2.63997403 |
| C | -3.71366465 | 3.43578660  | 1.60987100  |
| H | -4.21479197 | 2.77927982  | 2.09876302  |
| H | -4.31709532 | 3.99921961  | 1.11957401  |
| H | -3.20418858 | 3.97142627  | 2.22313230  |
| S | -4.82622885 | -2.96558260 | -1.11275469 |
| N | -3.22821329 | -1.68464585 | 0.81162798  |
| C | -3.85056035 | -2.23169102 | 0.00727674  |

**Compound 7 (SCN S-coordinated)**

|   |             |             |             |
|---|-------------|-------------|-------------|
| I | 0.51558023  | 1.26197527  | -0.01918508 |
| O | -0.93040717 | 0.26811698  | 2.54216202  |
| O | -4.05375750 | -2.83591931 | 0.79801757  |
| O | -0.89013138 | -0.57564405 | -2.06295290 |
| C | -0.95321948 | -0.19523189 | 0.24713390  |
| C | -2.52585762 | -1.32993004 | 1.66821221  |
| H | -2.87862078 | -1.50231167 | 2.51115590  |
| C | -1.46386906 | -0.86692886 | -0.87152603 |
| C | -2.51046629 | -1.77086158 | -0.73144151 |
| H | -2.85417785 | -2.22069210 | -1.46924553 |
| C | -1.50039283 | -0.42707305 | 1.52017266  |
| C | 2.18790900  | -0.08674261 | -0.04206968 |
| C | 3.23778912  | 0.20428854  | 0.79229060  |
| H | 3.21266043  | 0.95088953  | 1.34579903  |
| C | -3.03343009 | -1.98559587 | 0.54750931  |
| C | -1.45726526 | 0.03182075  | 3.85461997  |
| H | -2.38905184 | 0.26051935  | 3.87235436  |
| H | -0.98348749 | 0.57027710  | 4.49194385  |
| H | -1.35190449 | -0.89606013 | 4.07853527  |
| C | 3.27538060  | -2.01522587 | -0.91741267 |
| C | 4.34658754  | -0.64776470 | 0.79354628  |
| C | 4.34001804  | -1.74666516 | -0.06553721 |
| H | 5.07343897  | -2.31984173 | -0.06750496 |
| C | -1.35115085 | -1.27943064 | -3.23357433 |
| H | -2.28803716 | -1.11115603 | -3.36050046 |
| H | -1.20835193 | -2.22144014 | -3.11716707 |
| H | -0.86443560 | -0.97455221 | -4.00251775 |
| C | 2.17208639  | -1.16319290 | -0.90509398 |
| H | 1.44450006  | -1.31732191 | -1.46352783 |
| C | -4.65040192 | -3.53006725 | -0.30364284 |
| H | -4.93911805 | -2.89412658 | -0.96356917 |
| H | -5.40565217 | -4.03444047 | 0.00659671  |
| H | -4.00637128 | -4.12478172 | -0.69385820 |
| C | 3.32808684  | -3.18185590 | -1.87160470 |
| H | 3.83594467  | -2.93706109 | -2.64799384 |
| H | 2.43692991  | -3.42077217 | -2.13372660 |
| H | 3.74661192  | -3.92989881 | -1.43856828 |
| C | 5.49802954  | -0.40239623 | 1.72837372  |
| H | 5.59503667  | 0.54085520  | 1.87673653  |
| H | 6.30497706  | -0.75018349 | 1.34126110  |
| H | 5.33036899  | -0.84245010 | 2.56551629  |
| S | -1.71376400 | 3.53748216  | 0.10505728  |
| N | -0.98499157 | 4.59865648  | -2.39303694 |
| C | -1.24441346 | 4.16737345  | -1.35368598 |

**Compound 8 (SCN N-coordinated, A)**

|    |             |             |             |
|----|-------------|-------------|-------------|
| I  | -0.31026437 | -1.54645596 | -0.75367538 |
| Cl | -6.02129535 | 1.30674320  | 0.86882664  |
| O  | 0.90669624  | -0.92306589 | 1.95628421  |
| O  | 0.65489551  | 0.94087084  | -2.31531763 |
| O  | 2.95853716  | 3.29313470  | 1.24253622  |
| C  | 0.79712149  | 0.09317686  | -0.14297611 |
| C  | 1.11236873  | 1.10841591  | -1.04874921 |
| C  | -2.18128459 | -0.66363232 | -0.29919465 |
| C  | 1.24480920  | 0.14043640  | 1.19051237  |
| C  | -2.47816541 | 0.58870404  | -0.81715900 |
| H  | -1.88994157 | 1.01317140  | -1.39996208 |
| C  | 1.85002123  | 2.20942160  | -0.62394617 |
| H  | 2.06955478  | 2.89419231  | -1.21275262 |
| C  | -3.67233171 | 1.19500174  | -0.44664798 |

|   |             |             |             |
|---|-------------|-------------|-------------|
| H | -3.89660217 | 2.03544507  | -0.77755078 |
| C | 2.25214368  | 2.25545248  | 0.71331565  |
| C | -3.02707056 | -1.32746765 | 0.57180623  |
| H | -2.80136270 | -2.16554226 | 0.90576893  |
| C | -4.52331548 | 0.53336534  | 0.41971311  |
| C | 1.96719986  | 1.23166589  | 1.61850326  |
| H | 2.26245424  | 1.28516858  | 2.49846121  |
| C | -4.22099859 | -0.71611360 | 0.93729762  |
| H | -4.80792324 | -1.13992822 | 1.52035770  |
| C | 1.42906801  | -0.96182196 | 3.29520947  |
| H | 1.16549049  | -1.78218840 | 3.71778777  |
| H | 1.08286518  | -0.21892246 | 3.79487536  |
| H | 2.38659496  | -0.90985439 | 3.26642740  |
| C | 1.04734763  | 1.91104234  | -3.30306129 |
| H | 0.68722492  | 1.66196919  | -4.15744508 |
| H | 2.00516949  | 1.94326354  | -3.35664485 |
| H | 0.71198522  | 2.77523367  | -3.05439311 |
| C | 3.38305436  | 4.32974723  | 0.35227571  |
| H | 3.90416457  | 3.94763722  | -0.35851554 |
| H | 3.91649806  | 4.96587350  | 0.83357777  |
| H | 2.61358381  | 4.77055654  | -0.01519172 |
| S | 4.26185519  | -1.62224531 | 0.64808059  |
| N | 2.33166845  | -2.79711446 | -1.00826553 |
| C | 3.14067922  | -2.30745013 | -0.31848421 |

**Compound 8 (SCN N-coordinated B)**

|    |             |             |             |
|----|-------------|-------------|-------------|
| I  | -0.38715975 | -1.34978220 | 0.17519105  |
| Cl | -2.82826864 | 4.76252668  | -0.08900647 |
| O  | 1.47932713  | -0.63236073 | 2.45883341  |
| O  | 1.52193672  | -0.84540816 | -2.20346658 |
| O  | 5.43079735  | 0.70984258  | 0.20490171  |
| C  | 1.57061995  | -0.67721347 | 0.12617318  |
| C  | 2.23416889  | -0.52600034 | -1.09339782 |
| C  | -1.23320877 | 0.58746615  | 0.04133727  |
| C  | 2.21758071  | -0.40833543 | 1.34682697  |
| C  | -0.82871527 | 1.42914499  | -0.98469070 |
| H  | -0.23634037 | 1.13133461  | -1.63756144 |
| C  | 3.54713991  | -0.06502123 | -1.11358944 |
| H  | 4.00455920  | 0.04122278  | -1.91563603 |
| C  | -1.32709080 | 2.72589275  | -1.01592450 |
| H  | -1.07179555 | 3.31266695  | -1.69169019 |
| C  | 4.15857526  | 0.23266414  | 0.10691076  |
| C  | -2.10994696 | 0.99175296  | 1.03257695  |
| H  | -2.36210034 | 0.40688953  | 1.71021816  |
| C  | -2.20752273 | 3.13311462  | -0.03026350 |
| C  | 3.51350130  | 0.05662172  | 1.33230262  |
| H  | 3.95349489  | 0.24943755  | 2.12828715  |
| C  | -2.60615992 | 2.28988212  | 0.99469221  |
| H  | -3.19708274 | 2.58743446  | 1.64763268  |
| C  | 2.13478514  | -0.46649576 | 3.72767491  |
| H  | 1.52916192  | -0.70234203 | 4.43382198  |
| H  | 2.40513211  | 0.44880712  | 3.83041356  |
| H  | 2.90701307  | -1.03450860 | 3.76525597  |
| C  | 2.20250433  | -0.80439357 | -3.47076075 |
| H  | 1.60135013  | -1.08112323 | -4.16626905 |
| H  | 2.95826560  | -1.39566020 | -3.44708041 |
| H  | 2.50232477  | 0.09058433  | -3.64469389 |
| C  | 6.19540741  | 0.81404846  | -1.00002848 |
| H  | 6.23233446  | -0.04376844 | -1.43081226 |
| H  | 7.08539168  | 1.10485613  | -0.78972042 |
| H  | 5.78137474  | 1.45048564  | -1.58735694 |
| S  | -5.66654735 | -2.35679677 | -0.71995870 |
| N  | -3.13004029 | -2.10889927 | 0.44393306  |
| C  | -4.19072167 | -2.20918806 | -0.04103388 |

**Compound 9 (SCN N-coordinated, A)**

|    |             |             |             |
|----|-------------|-------------|-------------|
| I  | -0.33184079 | -1.66505983 | 0.74661831  |
| Br | 5.81256736  | 0.80533240  | -0.52959001 |
| O  | -1.32852896 | -0.82057725 | -1.99980584 |
| O  | -3.07665492 | 3.51779348  | -1.17940127 |
| O  | -1.14435206 | 0.83412413  | 2.36359600  |
| C  | -1.25413428 | 0.08892094  | 0.15148962  |
| C  | -1.52787026 | 1.08954668  | 1.09398679  |
| C  | 3.26675376  | 0.76140513  | 0.73193658  |
| H  | 3.54372847  | 1.56206755  | 1.11481969  |
| C  | -1.62116726 | 0.22974836  | -1.18850002 |
| C  | 4.10228601  | 0.06662793  | -0.13724848 |
| C  | -1.79919094 | -0.75143442 | -3.35806054 |
| H  | -1.60705391 | -1.57849744 | -3.80582092 |
| H  | -1.35792866 | -0.03042428 | -3.81332192 |
| H  | -2.74768421 | -0.59973092 | -3.36000799 |

|   |             |             |             |
|---|-------------|-------------|-------------|
| C | -2.15923898 | 2.27599139  | 0.67563939  |
| H | -2.35311788 | 2.95467674  | 1.28107190  |
| C | -2.48243282 | 2.40110220  | -0.65994923 |
| C | -1.52449982 | 1.80051395  | 3.37958231  |
| H | -1.22082721 | 1.49796914  | 4.23903808  |
| H | -2.48020021 | 1.89155574  | 3.39224667  |
| H | -1.12490978 | 2.65010370  | 3.17973029  |
| C | 3.71491225  | -1.11181449 | -0.73828031 |
| H | 4.29040187  | -1.55238624 | -1.32204485 |
| C | -2.22893888 | 1.39953431  | -1.60782345 |
| H | -2.46448602 | 1.51916493  | -2.50038591 |
| C | 2.44835298  | -1.63659181 | -0.46355390 |
| H | 2.16116517  | -2.42790993 | -0.85887875 |
| C | 1.63257009  | -0.94006543 | 0.41918416  |
| C | -3.50326886 | 4.53574976  | -0.24926185 |
| H | -4.02371113 | 4.13219307  | 0.44888106  |
| H | -4.03579829 | 5.18751960  | -0.70976020 |
| H | -2.73318693 | 4.96337470  | 0.13252500  |
| C | 2.01892387  | 0.24184969  | 1.01512481  |
| H | 1.44688682  | 0.68315499  | 1.60093916  |
| S | -4.79728391 | -1.28110579 | -0.90443909 |
| N | -3.09521172 | -2.67183446 | 0.83587493  |
| C | -3.80410043 | -2.09133142 | 0.11750722  |

**Compound 9 (SCN N-coordinated B)**

|    |             |             |             |
|----|-------------|-------------|-------------|
| I  | 0.24765194  | -1.70303755 | 0.21404771  |
| Br | -3.68679060 | 3.76682455  | -0.07932486 |
| O  | 1.88866823  | -0.49887826 | 2.47379321  |
| O  | 5.39543297  | 1.70308195  | 0.14904785  |
| O  | 1.94560954  | -0.77179877 | -2.18812759 |
| C  | 1.97642288  | -0.56854756 | 0.13964689  |
| C  | 2.57195352  | -0.28195109 | -1.09635064 |
| C  | -1.67945019 | 1.98656207  | -1.01516446 |
| H  | -1.58127767 | 2.60366120  | -1.70358701 |
| C  | 2.54234173  | -0.13316852 | 1.33977137  |
| C  | -2.62146052 | 2.19038954  | -0.01147973 |
| C  | 2.51172060  | -0.16407149 | 3.72713650  |
| H  | 2.00432527  | -0.54359475 | 4.44821300  |
| H  | 2.54223136  | 0.79062411  | 3.82438029  |
| H  | 3.40482489  | -0.51724542 | 3.74416961  |
| C  | 3.74995103  | 0.48770403  | -1.13163402 |
| H  | 4.16552763  | 0.69083248  | -1.93834728 |
| C  | 4.26978122  | 0.93098248  | 0.06719239  |
| C  | 2.60650811  | -0.59275787 | -3.46945785 |
| H  | 2.08148578  | -1.00353022 | -4.16085662 |
| H  | 3.47439896  | -1.00237258 | -3.44128870 |
| H  | 2.70106239  | 0.34458816  | -3.65346244 |
| C  | -2.77842385 | 1.30644335  | 1.03447719  |
| H  | -3.41081464 | 1.47079300  | 1.69715652  |
| C  | 3.69199887  | 0.63561296  | 1.31008713  |
| H  | 4.07378745  | 0.95020618  | 2.09858587  |
| C  | -1.97653427 | 0.16237942  | 1.09041511  |
| H  | -2.05967090 | -0.44779751 | 1.78734794  |
| C  | -1.05255616 | -0.03539216 | 0.07206937  |
| C  | 6.13307721  | 1.93176869  | -1.07036887 |
| H  | 6.29244450  | 1.09310421  | -1.50896394 |
| H  | 6.97165032  | 2.34962881  | -0.86387858 |
| H  | 5.62431642  | 2.50385506  | -1.64961851 |
| C  | -0.89233905 | 0.85268574  | -0.97051683 |
| H  | -0.26284979 | 0.68984959  | -1.63563550 |
| S  | -4.59516768 | -4.02388591 | -0.74497996 |
| N  | -2.21508884 | -3.12657176 | 0.43397532  |
| C  | -3.20610853 | -3.49889523 | -0.05052831 |

**Tetramers (Figure 7, left)**

|   |            |            |            |
|---|------------|------------|------------|
| I | -1.7610133 | -1.7477485 | -1.1921710 |
| C | -3.6970138 | -1.8657695 | -2.0334916 |
| C | -4.6955258 | -1.0322825 | -1.5573385 |
| H | -4.4816220 | -0.3014010 | -0.7877612 |
| C | -5.9665276 | -1.1293024 | -2.1071176 |
| H | -6.7551404 | -0.4808628 | -1.7437292 |
| C | -1.8773228 | -3.8040391 | -0.6352925 |
| C | -3.0221523 | -4.2709658 | -0.0114621 |
| H | -3.8566589 | -3.6093719 | 0.1885852  |
| C | -3.9367171 | -2.7836220 | -3.0440068 |
| H | -3.1452210 | -3.4307116 | -3.4029187 |
| C | -6.2249070 | -2.0468452 | -3.1148940 |
| H | -7.2191127 | -2.1171126 | -3.5405937 |
| C | -5.2117546 | -2.8717142 | -3.5830845 |
| H | -5.4094000 | -3.5848193 | -4.3748926 |

|                          |            |            |            |
|--------------------------|------------|------------|------------|
| C                        | -0.8010190 | -4.6318816 | -0.9018545 |
| H                        | 0.0968662  | -4.2370848 | -1.3588750 |
| C                        | -3.0910453 | -5.6099071 | 0.3456328  |
| H                        | -3.9810960 | -5.9863822 | 0.8364525  |
| C                        | -0.8839968 | -5.9689917 | -0.5371686 |
| H                        | -0.0470999 | -6.6277087 | -0.7380150 |
| C                        | -2.0247073 | -6.4578199 | 0.0822344  |
| H                        | -2.0818226 | -7.5024047 | 0.3652910  |
| S                        | 2.1686577  | -1.2023035 | 2.1267284  |
| N                        | 0.6549386  | -2.0219208 | -0.0894512 |
| C                        | 1.2783766  | -1.6840957 | 0.8402605  |
| S                        | -2.0532868 | 1.1910576  | -2.0450019 |
| N                        | -0.6887988 | 1.9583858  | 0.2840671  |
| C                        | -1.2501465 | 1.6442832  | -0.6929653 |
| I                        | 1.7793968  | 1.7235419  | 1.2724174  |
| C                        | 3.7569950  | 1.8780622  | 2.0061396  |
| C                        | 4.7400122  | 1.0557264  | 1.4809268  |
| H                        | 4.4948996  | 0.3171007  | 0.7281756  |
| C                        | 6.0376299  | 1.1745673  | 1.9595652  |
| H                        | 6.8145228  | 0.5349756  | 1.5573080  |
| C                        | 1.8285571  | 3.7794001  | 0.7063093  |
| C                        | 2.9192315  | 4.2616668  | 0.0024383  |
| H                        | 3.7471436  | 3.6116439  | -0.2553152 |
| C                        | 4.0381195  | 2.8063213  | 2.9961120  |
| H                        | 3.2580849  | 3.4445876  | 3.3938682  |
| C                        | 6.3372021  | 2.1023848  | 2.9462638  |
| H                        | 7.3519976  | 2.1895012  | 3.3166402  |
| C                        | 5.3393026  | 2.9160342  | 3.4640716  |
| H                        | 5.5695105  | 3.6372616  | 4.2395611  |
| C                        | 0.7612924  | 4.5917442  | 1.0467515  |
| H                        | -0.0960131 | 4.1849064  | 1.5668903  |
| C                        | 2.9422917  | 5.6004591  | -0.3611165 |
| H                        | 3.7893308  | 5.9889005  | -0.9147155 |
| C                        | 0.7978105  | 5.9288319  | 0.6749521  |
| H                        | -0.0326679 | 6.5755744  | 0.9331883  |
| C                        | 1.8843396  | 6.4328549  | -0.0245436 |
| H                        | 1.9052794  | 7.4772953  | -0.3130550 |
| tetramer Figure 7, right |            |            |            |
| I                        | 1.4601579  | 0.2467561  | 1.2894465  |
| C                        | 1.9073391  | -0.5899257 | 3.1759885  |
| C                        | 3.1323783  | -1.2089313 | 3.3693434  |
| C                        | 4.6856043  | 2.9730395  | 2.3082102  |
| H                        | 4.9360143  | 3.6074727  | 3.1504441  |
| C                        | 0.9485343  | -0.5242340 | 4.1721381  |
| C                        | 5.5104525  | 2.9329453  | 1.1915494  |
| C                        | 3.4046612  | -1.7683998 | 4.6079129  |
| H                        | 4.3592545  | -2.2530760 | 4.7763509  |
| C                        | 2.4559658  | -1.7178195 | 5.6208274  |
| C                        | 5.1856082  | 2.1257323  | 0.1125996  |
| H                        | 5.8180399  | 2.1000618  | -0.7666938 |
| C                        | 1.2331501  | -1.1029770 | 5.4021283  |
| H                        | 0.4850175  | -1.0708034 | 6.1851862  |
| C                        | 4.0393365  | 1.3420823  | 0.1422703  |
| H                        | 3.7857042  | 0.7231137  | -0.7094916 |
| C                        | 3.2295611  | 1.4010995  | 1.2632878  |
| C                        | 3.5287532  | 2.2103773  | 2.3483757  |
| H                        | 2.8796756  | 2.2422672  | 3.2152883  |
| S                        | 2.6284762  | 1.2856333  | -3.3482773 |
| N                        | 0.8218512  | 1.2687611  | -1.2163998 |
| C                        | 1.5851412  | 1.2852333  | -2.1209629 |
| S                        | -2.7201813 | -1.0035942 | 3.3885931  |
| N                        | -0.8918697 | -1.2213123 | 1.2857699  |
| C                        | -1.6652390 | -1.1377043 | 2.1782615  |
| I                        | -1.5044257 | -0.2246514 | -1.2440832 |
| C                        | -1.8997693 | 0.5819865  | -3.1531492 |
| C                        | -3.1030673 | 1.2313100  | -3.3808991 |
| C                        | -4.6884269 | -2.9716673 | -2.3420174 |
| H                        | -4.9216924 | -3.5959132 | -3.1967182 |
| C                        | -0.9277412 | 0.4655837  | -4.1315406 |
| C                        | -5.5260897 | -2.9584107 | -1.2345063 |
| C                        | -3.3391326 | 1.7680785  | -4.6367590 |
| H                        | -4.2761112 | 2.2762490  | -4.8325472 |
| C                        | -2.3763716 | 1.6657773  | -5.6325240 |
| C                        | -5.2231520 | -2.1632151 | -0.1403033 |
| H                        | -5.8673804 | -2.1561928 | 0.7307990  |
| C                        | -1.1751568 | 1.0224600  | -5.3793784 |
| H                        | -0.4145929 | 0.9530283  | -6.1478216 |
| C                        | -4.0857989 | -1.3660908 | -0.1444200 |
| H                        | -3.8510857 | -0.7551799 | 0.7189858  |

|   |            |            |            |
|---|------------|------------|------------|
| C | -3.2627737 | -1.3987302 | -1.2569594 |
| C | -3.5406222 | -2.1944542 | -2.3575075 |
| H | -2.8823082 | -2.2046786 | -3.2180282 |
| H | 3.8674363  | -1.2493605 | 2.5742802  |
| H | 2.6713250  | -2.1653746 | 6.5840120  |
| H | -0.0141385 | -0.0568694 | 4.0035615  |
| H | 6.4084342  | 3.5389562  | 1.1623594  |
| H | 0.0184715  | -0.0226638 | -3.9339346 |
| H | -2.5634234 | 2.0961797  | -6.6093722 |
| H | -3.8485041 | 1.3130271  | -2.5989072 |
| H | -6.4172894 | -3.5749817 | -1.2247677 |



## References

- 1 N. S. Soldatova, P. S. Postnikov, M. S. Yusubov and T. Wirth, Flow Synthesis of Iodonium Trifluoroacetates through Direct Oxidation of Iodoarenes by Oxone®, *European J. Org. Chem.*, 2019, **2019**, 2081–2088.
- 2 V. Carreras, A. H. Sandtorv and D. R. Stuart, Synthesis of Aryl(2,4,6-trimethoxyphenyl)iodonium Trifluoroacetate Salts, *J. Org. Chem.*, 2017, **82**, 1279–1284.
- 3 J. J. Lubinkowski, M. Gomez, J. L. Calderon and W. E. McEwen, Reactions of Diaryliodonium Fluoroborates with Inorganic Anions, *J. Org. Chem.*, 1978, **43**, 2432–2435.
- 4 SDBSWeb (National Institute of Advanced Industrial Science and Technology, 2020), <https://sdb.sdb.aist.go.jp>.
- 5 Y. Chen, H. Qi, N. Chen, D. Ren, J. Xu and Z. Yang, Fluorine-Initiated Dealkylative Cyanation of Thioethers to Thiocyanates, *J. Org. Chem.*, 2019, **84**, 9044–9050.
- 6 Q. Wen, J. Jin, Y. Mei, P. Lu and Y. Wang, Copper-Mediated Cyanation of Aryl Halides by Activation of Benzyl Cyanide as the Cyanide Source, *European J. Org. Chem.*, 2013, **2013**, 4032–4036.
- 7 X.-K. Guo, D.-Y. Zhao, J.-H. Li, X.-G. Zhang, C.-L. Deng and R.-Y. Tang, Iron-Catalyzed Benzoylation Reaction of Arenes with Benzyl Thiocyanates, *Synlett*, 2012, **23**, 627–631.
